# Supplementary material for: Enhancing activity and selectivity of palladium catalysts in ketone α-arylation by tailoring the imine chelate of pyridinium amidate (PYA) ligands
Source: Royal Society of Chemistry journal article supplement (doi:10.1039/d4cy01337a), 2024-12-18
Supplement: d4cy01337a1.pdf [file d4cy01337a1.pdf]

## Electronic Supporting Information

*belonging to*

### **Enhancing activity and selectivity of palladium catalysts in ketone $\alpha$ -arylation by tailoring the imine chelate of pyridinium amidate (PYA) ligands**

Esaïe Reusser<sup>a</sup>, Michael Aeschlimann<sup>a</sup> and Martin Albrecht<sup>\*a</sup>

<sup>a</sup> Department of Chemistry, Biochemistry and Pharmaceutical Sciences, University of Bern, Freiestrasse 3, 3012 Bern, Switzerland

Email: martin.albrecht@unibe.ch

# Contents

|            |                                                                                                     |           |
|------------|-----------------------------------------------------------------------------------------------------|-----------|
| <b>S.1</b> | <b>Synthetic procedures</b> .....                                                                   | <b>3</b>  |
| S.1.1      | General information .....                                                                           | 3         |
| S.1.2      | Synthesis of precursor esters .....                                                                 | 4         |
| S.1.3      | Synthesis of carboxylic acids <b>1c–1g</b> .....                                                    | 9         |
| S.1.4      | Synthesis of pyridine carboxamides <b>2a–2f</b> .....                                               | 14        |
| S.1.5      | Synthesis of pyridinium iodide salts <b>3a–3g</b> .....                                             | 23        |
| S.1.6      | Synthesis of pyridinium amidate (PYA) <b>4a–4g</b> .....                                            | 33        |
| S.1.7      | Synthesis of PYA palladium complexes <b>5a–5g</b> .....                                             | 43        |
| <b>S.2</b> | <b>Crystal structure determinations</b> .....                                                       | <b>54</b> |
| <b>S.3</b> | <b>Buried volume calculations</b> .....                                                             | <b>58</b> |
| <b>S.4</b> | <b>Catalytic procedures</b> .....                                                                   | <b>62</b> |
| S.4.1      | General procedure for propiophenone $\alpha$ -arylation .....                                       | 62        |
| S.4.2      | Procedure for the acquisition of time-conversion profiles and TOF <sub>max</sub> determination..... | 62        |
| S.4.3      | General procedure for determining the order in palladium complex .....                              | 65        |
| S.4.4      | Procedure for determining the rate order in substrates.....                                         | 69        |
| S.4.5      | Procedures for catalyst poisoning experiments .....                                                 | 71        |
| S.4.6      | General procedure for temperature screening experiments.....                                        | 73        |
| S.4.7      | Procedure for evaluating air and moisture tolerance .....                                           | 75        |
| S.4.8      | Procedure for substrates refilling experiment.....                                                  | 75        |
| S.4.9      | Procedure for catalyst recycling experiments.....                                                   | 75        |
| S.4.10     | Studies on catalyst activation using <b>5d</b> .....                                                | 77        |
| S.4.11     | General procedure for aryl chloride activation and competitive C–Br vs C–Cl conversion...           | 80        |
| <b>S.5</b> | <b>References</b> .....                                                                             | <b>84</b> |

## S.1 Synthetic procedures

### S.1.1 General information

Phenyl azide and complex **5a** were prepared according to previously reported procedures.<sup>S1,S2</sup> MeCN, tetrahydrofuran (THF) and CH<sub>2</sub>Cl<sub>2</sub> were dried by passage through a solvent purification column. All other reagents and solvents were purchased from commercial vendors and used as received. Unless otherwise stated, all the reactions were run under exclusion of air using standard Schlenk techniques under an atmosphere of dry nitrogen and extra dry, stabilized 1,4-dioxane (99.8%) purchased from Thermochemical was used for catalysis.

Unless otherwise specified, NMR spectra were recorded at 25 °C on Bruker spectrometers operating at 300 or 400 MHz (<sup>1</sup>H NMR) and 75 or 101 MHz (<sup>13</sup>C{<sup>1</sup>H} NMR), respectively. Chemical shifts (δ) are expressed in ppm downfield from SiMe<sub>4</sub> using the residual protonated solvent as an internal standard and coupling constants in Hz. Assignments are based on homo- and heteronuclear shift correlation spectroscopy.

High-resolution mass spectrometry was carried out with a Thermo Scientific LTQ Orbitrap XL (ESI-TOF) or a Thermo Scientific Q Exactive GC directly used with a direct injection probe (DIP). Elemental analyses were performed on a Thermo Scientific Flash 2000 CHNS-O elemental analyzer. GC-FID reaction follow-up was achieved using an Agilent technologies 7820A GC System. GC-MS reaction follow-up was carried out on a Thermofisher ISQ7000 GC fitted with a Macherey-Nagel Optima delta-3-0.25 μm capillary column using Helium as a carrier gas, coupled to a quadrupole mass analyzer using EI mode at 70 eV.

## S.1.2 Synthesis of precursor esters

### Synthesis of prec-c

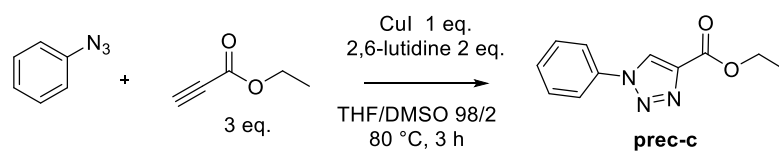

Phenyl azide (1.67 g, 14.0 mmol), copper(I) iodide (2.67 g, 14.0 mmol), THF (15 mL), and DMSO (0.3 mL) were charged in a pressure flask. Then 2,6-lutidine (3.25 mL, 28.0 mmol) was added followed by ethyl propiolate (4.26 mL, 42.0 mmol). The resulting mixture was stirred at 80 °C for 3 h. After cooling to room temperature the reaction mixture was poured into H<sub>2</sub>O (50 mL) and extracted with EtOAc (3 x 30 mL). The combined organic layers were washed with HCl<sub>aq</sub> (1 M, 100 mL) and brine (100 mL), dried over MgSO<sub>4</sub>, concentrated to dryness, triturated with pentane (3 x 10 mL) and dried under vacuum to yield **prec-c** as an off-white solid. (2.46 g, 81%). Spectroscopic data are in agreement with literature values.<sup>S3</sup> <sup>1</sup>H NMR (300 MHz, DMSO-*d*<sub>6</sub>, 298K)  $\delta$  = 9.48 (s, 1H, CH<sub>trz</sub>), 7.99 (dd,  $J_{HH}$  = 7.6, 1.8 Hz, 2H, CH<sub>Ph</sub>), 7.57 (m, 3H, CH<sub>Ph</sub>), 4.36 (q,  $^3J_{HH}$  = 7.1 Hz, 2H, CH<sub>2</sub>), 1.34 (t,  $^3J_{HH}$  = 7.1 Hz, 3H, CH<sub>3</sub>) ppm.

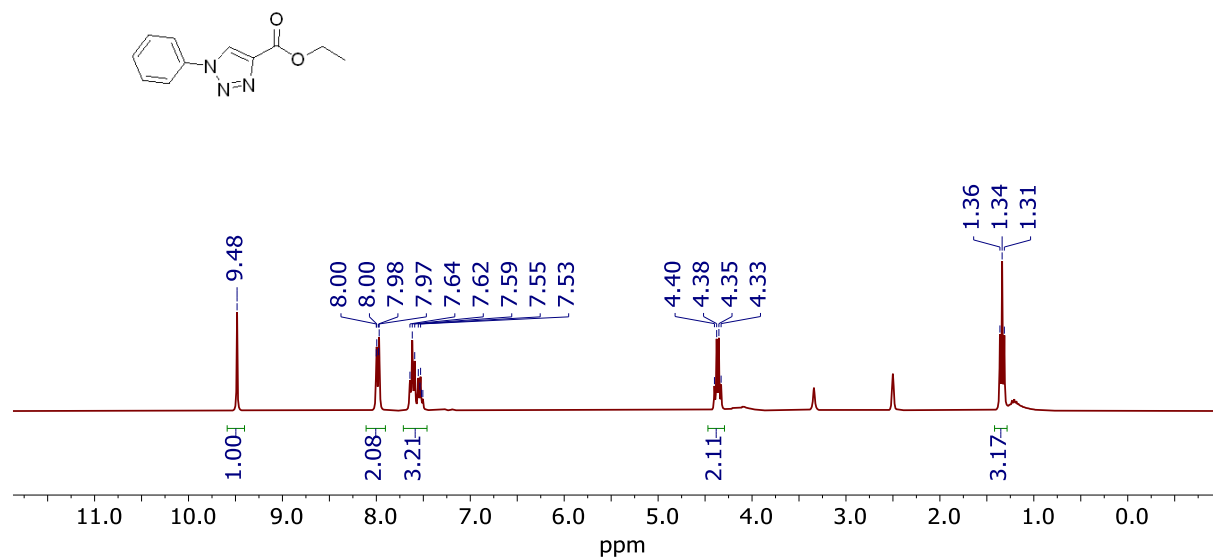

Figure S1: <sup>1</sup>H NMR spectrum (DMSO-*d*<sub>6</sub>, 298 K, 300 MHz) of **prec-c**.

## Synthesis of prec-e

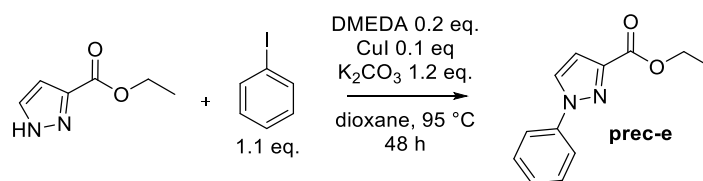

Ethyl 1H-pyrazole-3-carboxylate (3.00 g, 21.4 mmol), potassium carbonate (3.55 g, 25.7 mmol), and copper(I) iodide (408 mg, 2.14 mmol) were charged in a two-neck flask equipped with a condenser. The flask was then placed under a nitrogen atmosphere and 1,4-dioxane (30 mL) was added, followed by N,N'-dimethylethane-1,2-diamine (460  $\mu$ L, 4.28 mmol) and iodobenzene (2.63 mL, 23.5 mmol). The resulting suspension was heated under vigorous stirring to 95 °C for 48 h. After cooling to room temperature, the suspension was washed with NH<sub>4</sub>Cl<sub>aq</sub> (sat., 2 x 100 mL) and brine (50 mL). The organic phase was concentrated under vacuum, and the residue was purified by gradient flash column chromatography (FCC; SiO<sub>2</sub>; EtOAc:pentane, 0 to 100%) to yield **prec-e** as a yellow oil (3.68 g, 79 %). <sup>1</sup>H NMR (300 MHz, DMSO-*d*<sub>6</sub>, 298K)  $\delta$  = 8.63 (d, <sup>3</sup>J<sub>HH</sub> = 2.6 Hz, 1H, CH<sub>prz</sub>), 7.94 – 7.82 (m, 2H, CH<sub>phe</sub>), 7.57 – 7.40 (m, 2H, CH<sub>phe</sub>), 7.46 – 7.34 (m, 1H, CH<sub>phe</sub>), 7.01 (d, <sup>3</sup>J<sub>HH</sub> = 2.6 Hz, 1H, CH<sub>prz</sub>), 4.33 (q, <sup>3</sup>J<sub>HH</sub> = 7.0 Hz, 2H, CH<sub>2</sub>), 1.32 (t, <sup>3</sup>J<sub>HH</sub> = 7.0 Hz, 3H, CH<sub>3</sub>) ppm. <sup>13</sup>C {<sup>1</sup>H} NMR (75 MHz, DMSO-*d*<sub>6</sub>, 298K)  $\delta$  = 161.48 (CO), 144.29 (C<sub>prz</sub>), 139.16 (C<sub>phe</sub>), 129.83 (CH<sub>prz</sub>), 129.67 (CH<sub>phe</sub>), 127.48 (CH<sub>phe</sub>), 119.22 (CH<sub>phe</sub>), 110.20 (CH<sub>prz</sub>), 60.49 (CH<sub>2</sub>), 14.21 (CH<sub>3</sub>) ppm. HR-MS (m/z): calculated for C<sub>12</sub>H<sub>13</sub>N<sub>2</sub>O<sub>2</sub> [M+H]<sup>+</sup> = 217.0977; found: 217.0968.

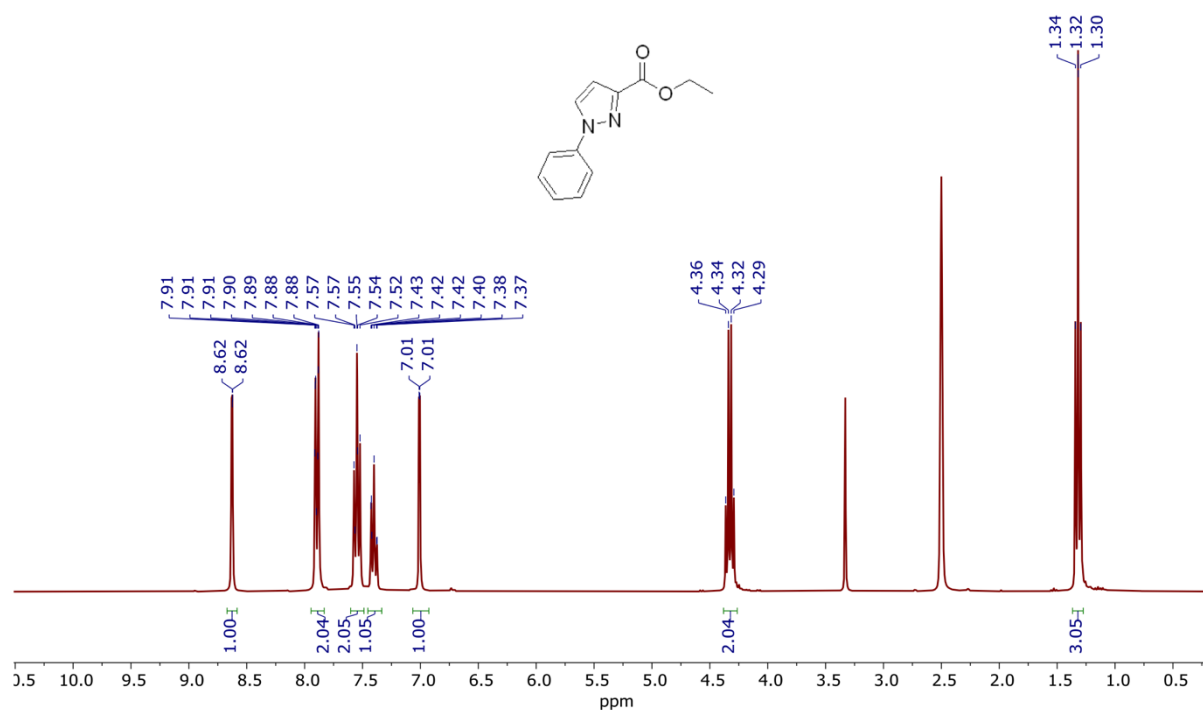

Figure S2: <sup>1</sup>H NMR spectrum (DMSO-*d*<sub>6</sub>, 298 K, 300 MHz) of **prec-e**.

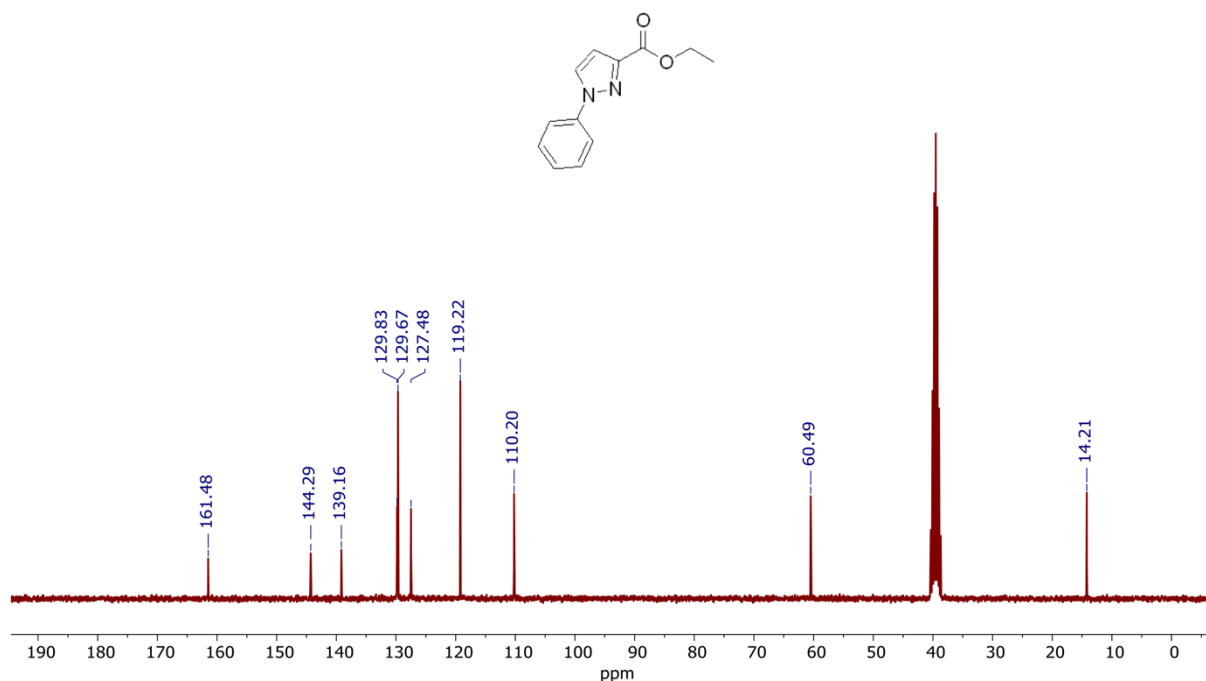

**Figure S3:**  $^{13}\text{C}\{^1\text{H}\}$  NMR spectrum (DMSO- $d_6$ , 298 K, 75 MHz) of **prec-e**.

### Synthesis of **prec-f**

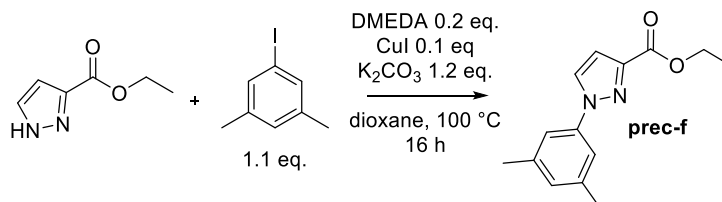

Ethyl 1H-pyrazole-3-carboxylate (2.00 g, 14.3 mmol), potassium carbonate (2.37 g, 17.1 mmol), copper(I) iodide (272 mg, 1.43 mmol) were charged in a 20 mL vial then 1,4-dioxane (10 mL),  $N^1,N^2$ -dimethylethane-1,2-diamine (307  $\mu\text{L}$ , 2.85 mmol) and iodobenzene (2.27 mL, 15.7 mmol) were added under  $\text{N}_2$ . The resulting suspension was heated to  $100^\circ\text{C}$  and was vigorously stirred at that temperature for 16 h. After cooling down to room temperature, the suspension was washed twice with  $\text{NH}_4\text{Cl}_{\text{aq}}$  (sat., 2 x 50ml) and brine (25 mL). The organic phase was then concentrated under vacuo and purified by gradient FCC ( $\text{SiO}_2$ ; EtOAc:pentane, 0 to 100%; rf 0.8 in 25 % EtOAc; 3<sup>rd</sup> fraction) to yield **prec-f** (3.16 g, 90 %) as a white powder.  $^1\text{H}$  NMR (300 MHz,  $\text{CD}_3\text{CN}$ , 298K)  $\delta$  = 8.15 (d,  $^3J_{\text{HH}}$  = 2.6 Hz, 1H,  $\text{CH}_{\text{prz}}$ ), 7.43 (s, 2H,  $\text{CH}_{\text{xyly}}$ ), 7.06 (s, 1H,  $\text{CH}_{\text{xyly}}$ ), 6.95 (d,  $^3J_{\text{HH}}$  = 2.6 Hz, 1H,  $\text{CH}_{\text{prz}}$ ) 4.37 (q,  $^3J_{\text{HH}}$  = 7.1 Hz, 2H,  $\text{CH}_2$ ), 2.39 (s, 6H, xylyl- $\text{CH}_3$ ), 1.38 (t,  $^3J_{\text{HH}}$  = 7.1 Hz 3H,  $\text{CH}_2\text{CH}_3$ ) ppm.  $^{13}\text{C}\{^1\text{H}\}$  NMR (75 MHz,  $\text{CD}_3\text{CN}$ , 298K)  $\delta$  = 162.57 (CO), 145.72 ( $\text{C}_{\text{prz}}$ ), 140.69 ( $\text{C}_{\text{xyly-Me}}$ ), 140.63 ( $\text{C}_{\text{phe}}$ ), 130.01 ( $\text{CH}_{\text{xyly}}$ ), 129.56 ( $\text{CH}_{\text{prz}}$ ), 118.15 ( $\text{CH}_{\text{xyly}}$ ), 110.81 ( $\text{CH}_{\text{prz}}$ ), 61.67 ( $\text{CH}_2$ ), 21.35 (xylyl- $\text{CH}_3$ ), 14.62 ( $\text{CH}_2\text{CH}_3$ ) ppm. HR-MS (m/z): calculated for  $\text{C}_{14}\text{H}_{17}\text{N}_2\text{O}_2$  [ $\text{M}+\text{H}$ ] $^+$  = 245.1290; found: 245.1280.

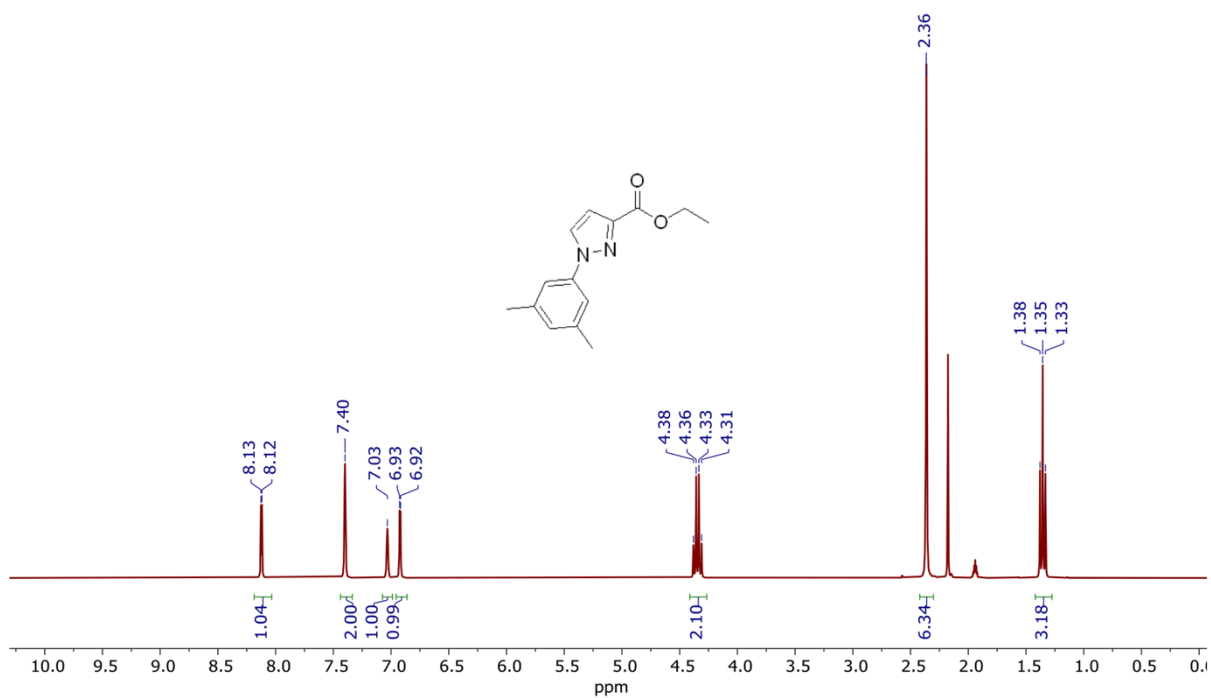

Figure S4:  $^1\text{H}$  NMR spectrum ( $\text{CD}_3\text{CN}$ , 298 K, 300 MHz) of prec-f.

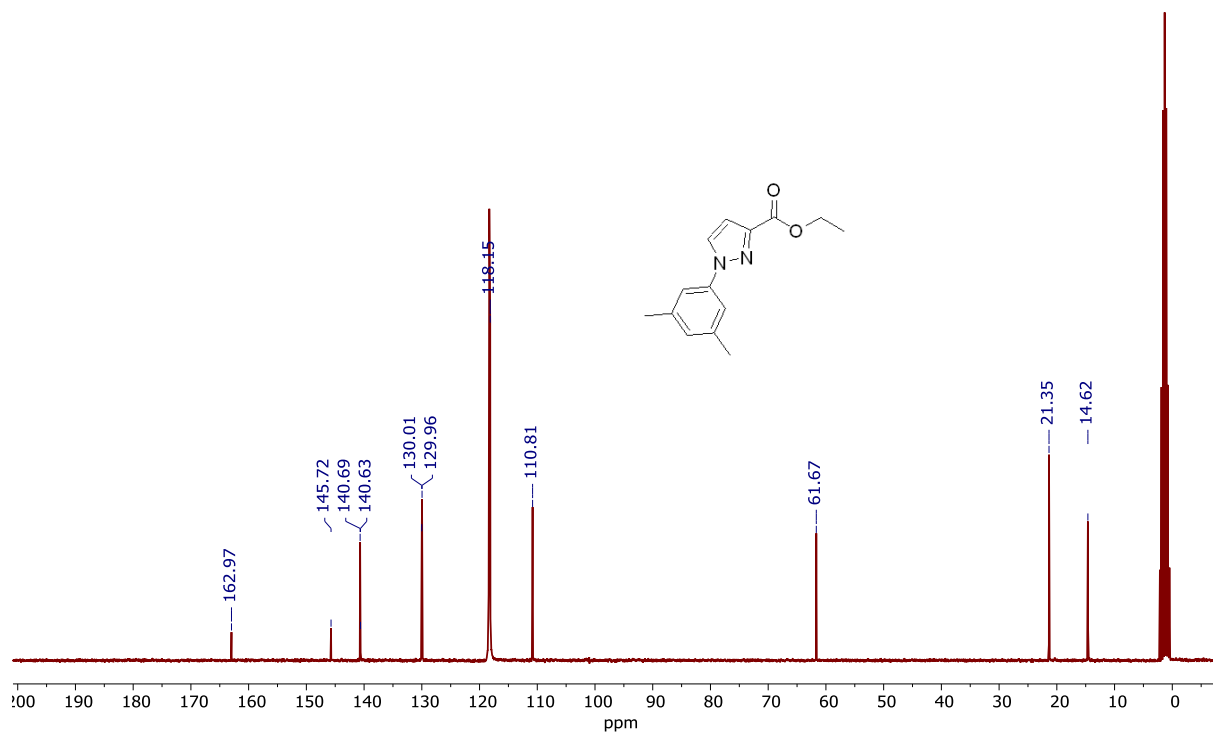

Figure S5:  $^{13}\text{C}\{^1\text{H}\}$  NMR spectrum ( $\text{CD}_3\text{CN}$ , 298 K, 75 MHz) of prec-f.

## Synthesis of prec-g

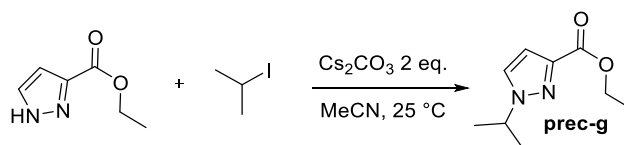

Ethyl 1H-pyrazole-3-carboxylate (1.5 g, 10.7 mmol) and  $\text{Cs}_2\text{CO}_3$  (6.9 g, 21.4 mmol) were dissolved in dry MeCN (40 mL) under constant  $\text{N}_2$  flow. 2-iodopropane (1.1 mL, 10.7 mmol) was added and the mixture stirred at rt for 16 h. The reaction mixture was then concentrated under vacuo followed by gradient FCC ( $\text{SiO}_2$ ; EtOAc:pentane, 0 to 30%; 2<sup>nd</sup> fraction) to yield **prec-g** as a colorless oil (0.80 g, 41%). Note: **prec-g** is also commercially available. The  $^1\text{H}$  NMR data (Figure S6) match those of commercial samples and purity is sufficient for further reactions.<sup>S4</sup>  $^1\text{H}$  NMR (300 MHz,  $\text{CD}_3\text{CN}$ , 298K)  $\delta$  = 7.63 (d,  $^3J_{\text{HH}} = 2.4$  Hz, 1H,  $\text{CH}_{\text{prz}}$ ), 7.64 (d,  $^3J_{\text{HH}} = 2.4$  Hz, 1H,  $\text{CH}_{\text{prz}}$ ), 6.73 (d,  $^3J_{\text{HH}} = 6.7$  Hz, 1H,  $i\text{Pr-CH}$ ), 6.74 (d,  $^3J_{\text{HH}} = 6.7$  Hz, 1H,  $i\text{Pr-CH}$ ), 4.31 (q,  $^3J_{\text{HH}} = 7.1$  Hz, 2H,  $\text{CH}_2$ ), 4.33 (q,  $^3J_{\text{HH}} = 6.7$  Hz, 1H,  $i\text{Pr-CH}$ ), 4.30 (q,  $^3J_{\text{HH}} = 6.7$  Hz, 1H,  $i\text{Pr-CH}$ ), 1.49 (d,  $^3J_{\text{HH}} = 6.7$  Hz, 6H,  $i\text{Pr-CH}_3$ ), 1.34 (t,  $^3J_{\text{HH}} = 7.1$  Hz, 3H,  $\text{CH}_2\text{CH}_3$ ) ppm.

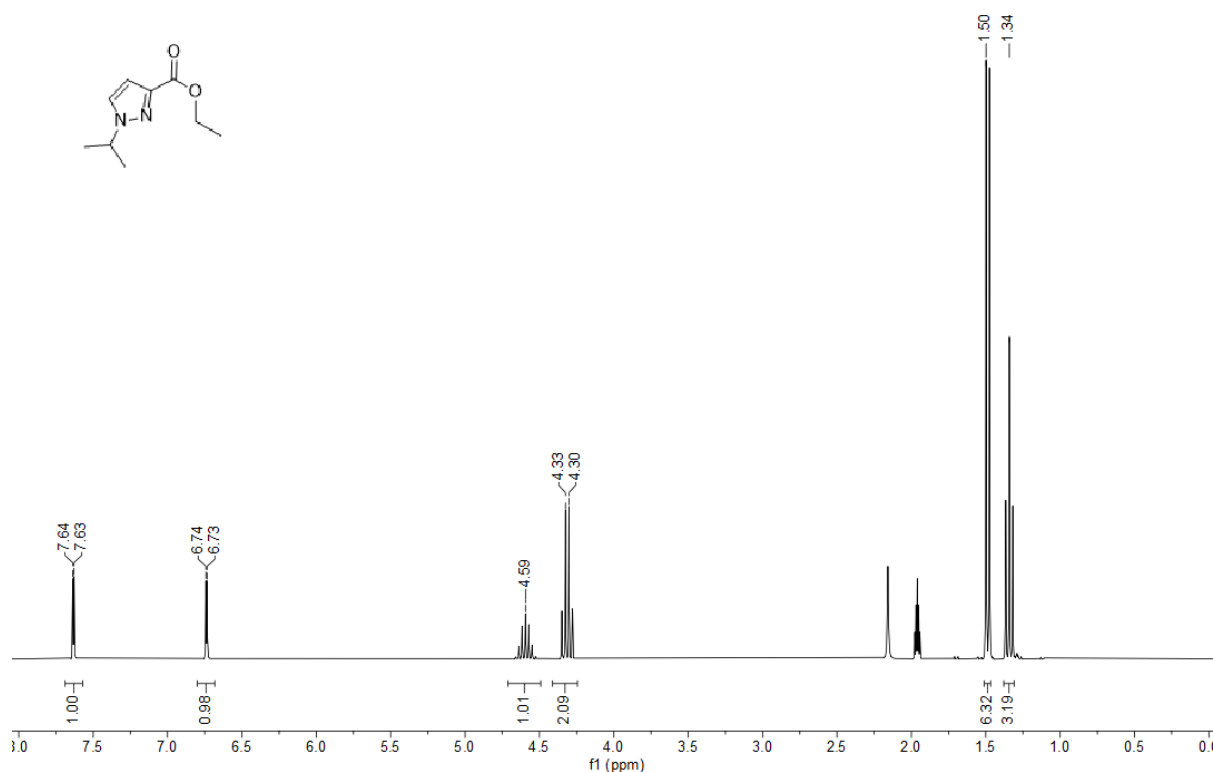

**Figure S6:**  $^1\text{H}$  NMR spectrum ( $\text{CD}_3\text{CN}$ , 298 K, 300 MHz) of **prec-g**.



### S.1.3 Synthesis of carboxylic acids 1c–1g

#### Synthesis of 1c

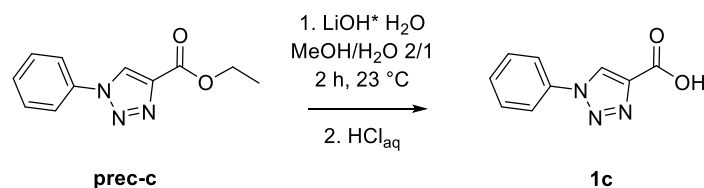

**Prec-c** (1.5 g, 6.9 mmol) and lithium hydroxide monohydrate (0.58 g, 13.8 mmol) were stirred for 1 h at 23 °C in a mixture of MeOH (10 mL) and H<sub>2</sub>O (5 mL). At full conversion (TLC monitoring), HCl<sub>aq</sub> (1.0 M, 15 mL) was added slowly and the resulting mixture was stirred for 20 min. The reaction mixture was then extracted with CH<sub>2</sub>Cl<sub>2</sub> (3 x 30 mL), the organic fractions were combined, dried over MgSO<sub>4</sub>, filtered, and concentrated to dryness to yield **1c** as a off-white solid (1.1 g, 84%). Spectroscopical data are in agreement with literature values.<sup>S5</sup> <sup>1</sup>H NMR (300 MHz, DMSO-*d*<sub>6</sub>, 298K) δ = 13.30 (s, 1H, COOH), 9.39 (s, 1H, CH<sub>trz</sub>), 7.98 (dd, *J*<sub>HH</sub> = 7.7, 1.7 Hz, 2H, CH<sub>Ph</sub>), 7.68 – 7.47 (m, 3H, CH<sub>Ph</sub>) ppm.

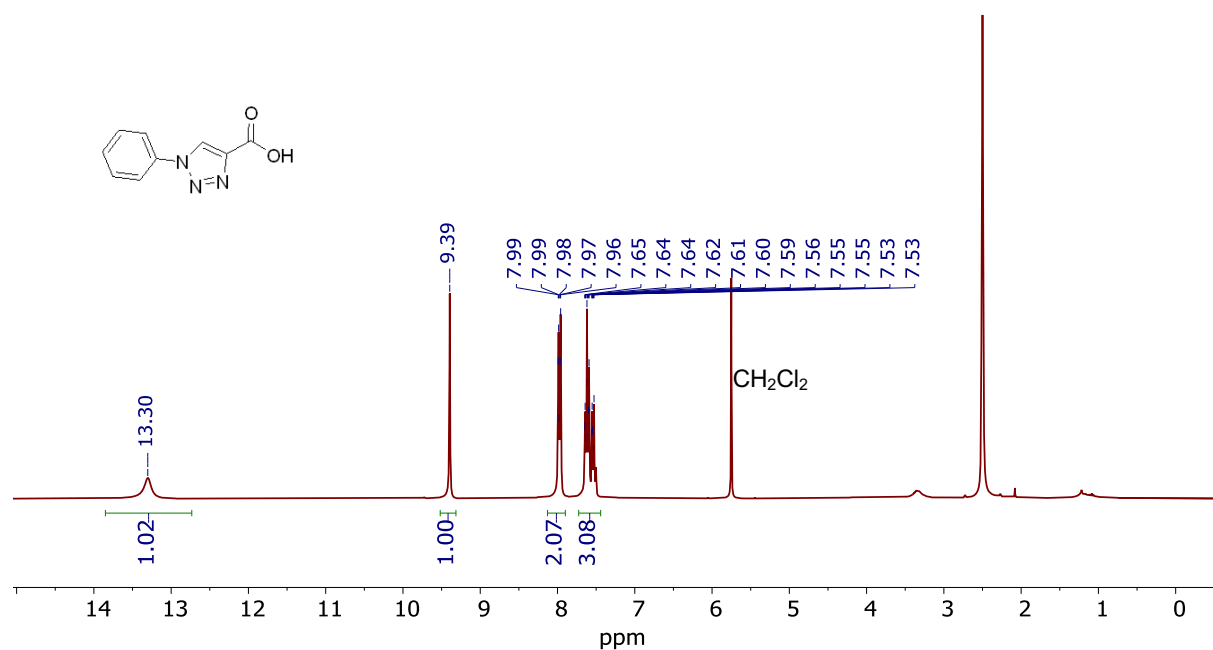

**Figure S7:** <sup>1</sup>H NMR spectrum (DMSO-*d*<sub>6</sub>, 298 K, 300 MHz) of **1c**.

## Synthesis of 1e

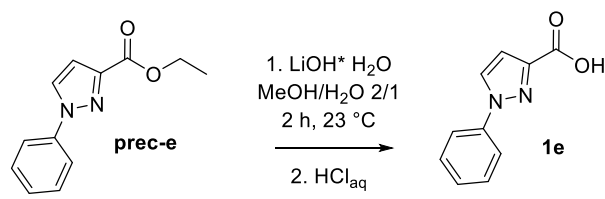

**Prec-e** (3.33 g, 15.4 mmol) and lithium hydroxide monohydrate (1.29 g, 30.8 mmol) were stirred for 1 h at 23 °C in a mixture of MeOH (10 mL) and H<sub>2</sub>O (5 mL). At full conversion (TLC monitoring), HCl<sub>aq</sub> (1.0 M, 35 mL) was added slowly and the resulting mixture was stirred for 20 min. The reaction mixture was then extracted with CH<sub>2</sub>Cl<sub>2</sub> (3 x 30 mL), the organic fractions were combined, dried over MgSO<sub>4</sub>, filtered, and concentrated to dryness to yield **1e** as an off-white solid (2.68 g, 92%). <sup>1</sup>H NMR (300 MHz, DMSO-*d*<sub>6</sub>, 298K) δ = 12.97 (s, 1H, COOH), 8.61 (d, <sup>3</sup>J<sub>HH</sub> = 2.6 Hz, 1H, CH<sub>prz</sub>), 7.95 – 7.84 (m, 2H, CH<sub>phe</sub>), 7.62 – 7.49 (m, 2H, CH<sub>phe</sub>), 7.46 – 7.34 (m, 1H, CH<sub>phe</sub>), 6.96 (d, <sup>3</sup>J<sub>HH</sub> = 2.6 Hz, 1H, CH<sub>prz</sub>), ppm. <sup>13</sup>C{<sup>1</sup>H} NMR (75 MHz, DMSO-*d*<sub>6</sub>, 298K) δ = 163.05 (CO), 145.28 (C<sub>prz</sub>), 139.33 (C<sub>phe</sub>), 129.76 (CH<sub>phe</sub>), 129.71 (CH<sub>prz</sub>), 127.44 (CH<sub>phe</sub>), 119.20 (CH<sub>phe</sub>), 110.32 (CH<sub>prz</sub>). HR-MS (m/z): calculated for C<sub>10</sub>H<sub>9</sub>N<sub>2</sub>O<sub>2</sub> [M+H]<sup>+</sup> = 189.0664; found: 189.0654.

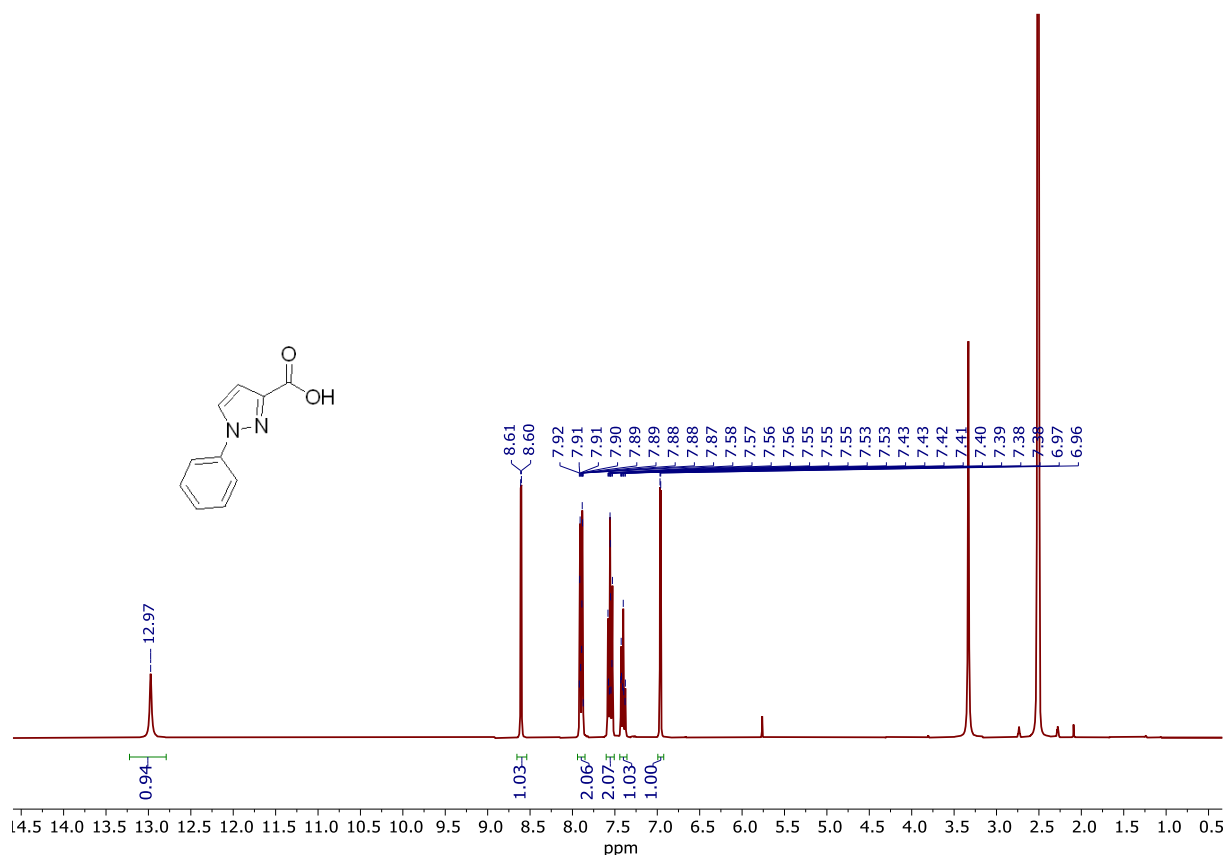

**Figure S8:** <sup>1</sup>H NMR spectrum (DMSO-*d*<sub>6</sub>, 298 K, 300 MHz) of **1e**.

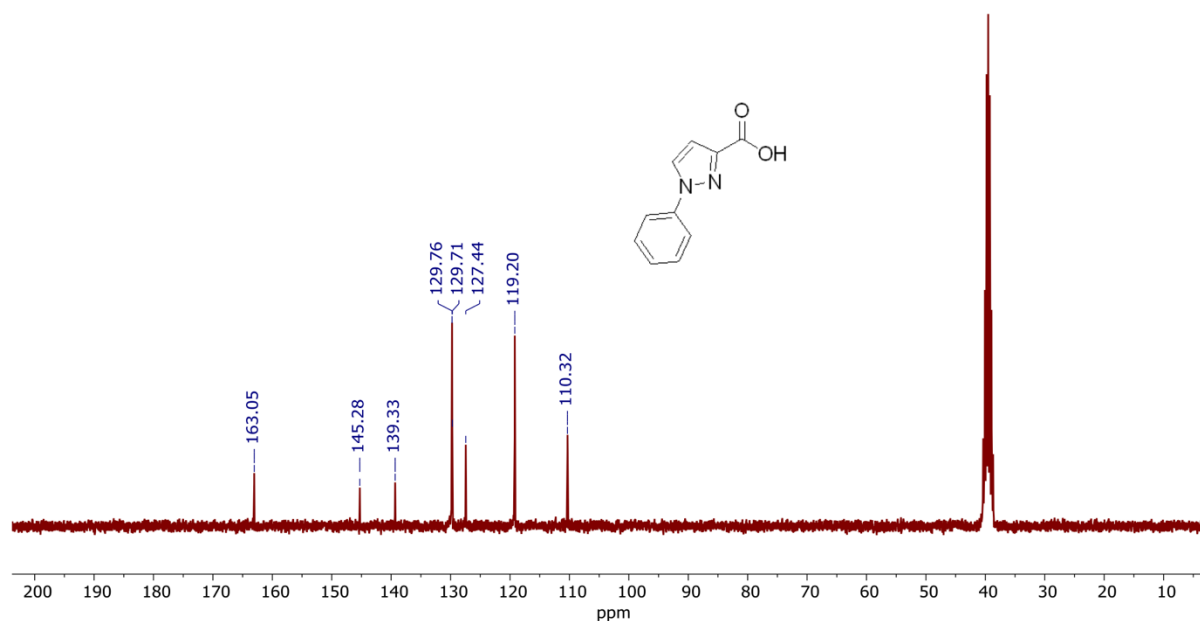

**Figure S9:**  $^{13}\text{C}\{^1\text{H}\}$  NMR spectrum (DMSO- $d_6$ , 298 K, 75 MHz) of **1e**.

### Synthesis of **1f**

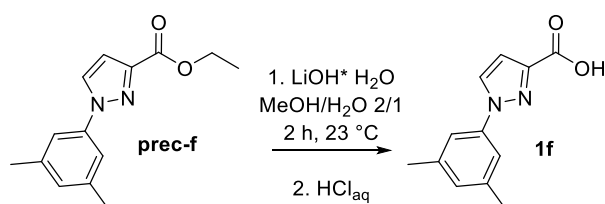

**Prec-f** (2.80 g, 11.5 mmol) and lithium hydroxide monohydrate (0.96 g, 23.0 mmol) were stirred for 1 h at 23 °C in a mixture of MeOH (20 mL) and H<sub>2</sub>O (10 mL). At full conversion (TLC monitoring), HCl<sub>aq</sub> (1.0 M, 25 mL) was added slowly and the resulting mixture was stirred for 20 more min. The reaction mixture was then extracted in CH<sub>2</sub>Cl<sub>2</sub> (3 x 30 mL), the organic fractions were combined, dried over MgSO<sub>4</sub>, filtered, and concentrated to dryness to yield **1f** as a white solid (2.43 g, 98%).  $^1\text{H}$  NMR (300 MHz, DMSO- $d_6$ , 298K)  $\delta$  = 12.94 (s, 1H, COOH), 8.53 (d,  $^3J_{\text{HH}} = 2.6$  Hz, 1H, CH<sub>prz</sub>), 7.51 (s, 2H, CH<sub>xylyl</sub>), 7.01 (s, 1H, CH<sub>xylyl</sub>), 6.92 (d,  $^3J_{\text{HH}} = 2.6$  Hz, 1H, CH<sub>prz</sub>), 2.35 (s, 6H, xylyl-CH<sub>3</sub>) ppm.  $^{13}\text{C}\{^1\text{H}\}$  NMR (75 MHz, DMSO- $d_6$ , 298K)  $\delta$  = 163.01 (COOH), 144.98 (C<sub>prz</sub>), 139.23 (C<sub>xylyl</sub>), 139.07 (C<sub>xylyl</sub>-Me), 129.49 (CH<sub>phe</sub>), 128.69 (CH<sub>prz</sub>), 116.78 (CH<sub>xylyl</sub>), 110.07 (CH<sub>prz</sub>), 20.92 (xylyl-CH<sub>3</sub>) ppm. HR-MS (m/z): calculated for C<sub>12</sub>H<sub>13</sub>N<sub>2</sub>O<sub>2</sub> [M+H]<sup>+</sup> = 217.0977; found: 217.0968.

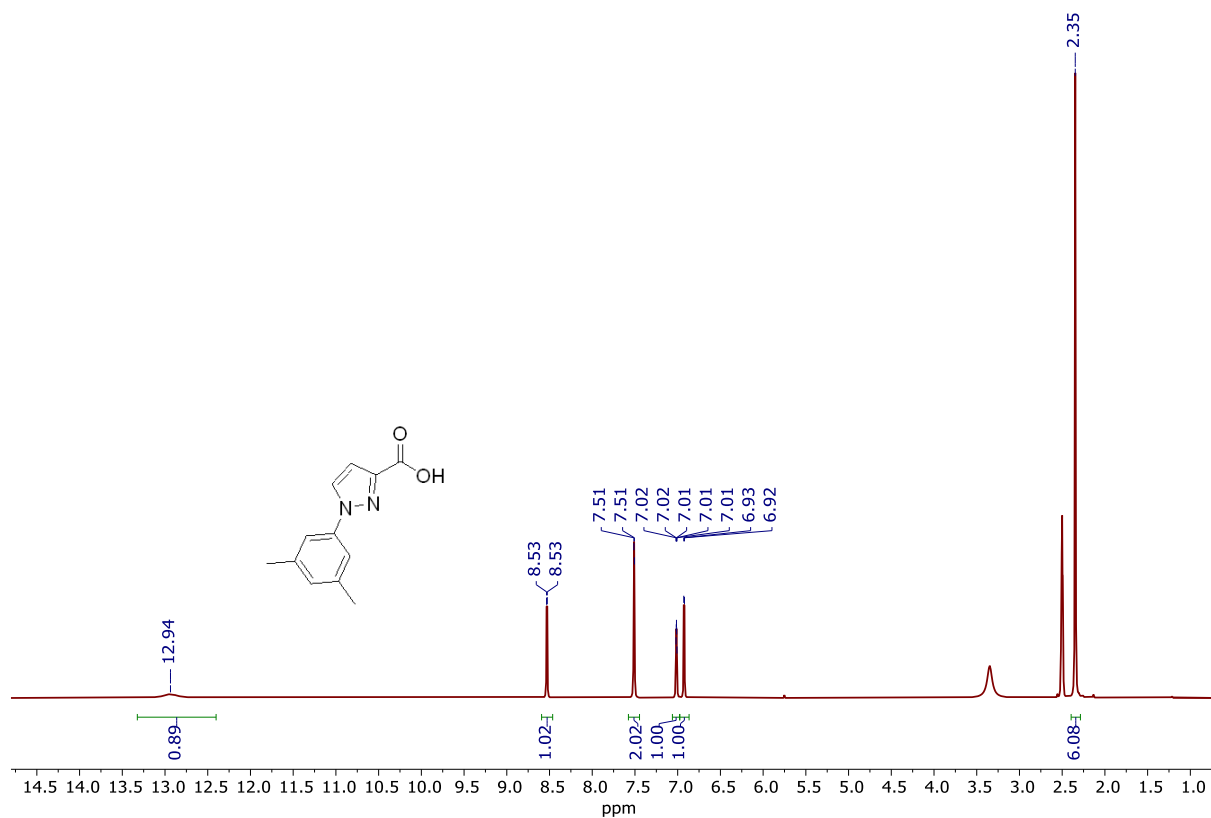

**Figure S10:**  $^1\text{H}$  NMR spectrum (DMSO- $d_6$ , 298 K, 300 MHz) of **1f**.

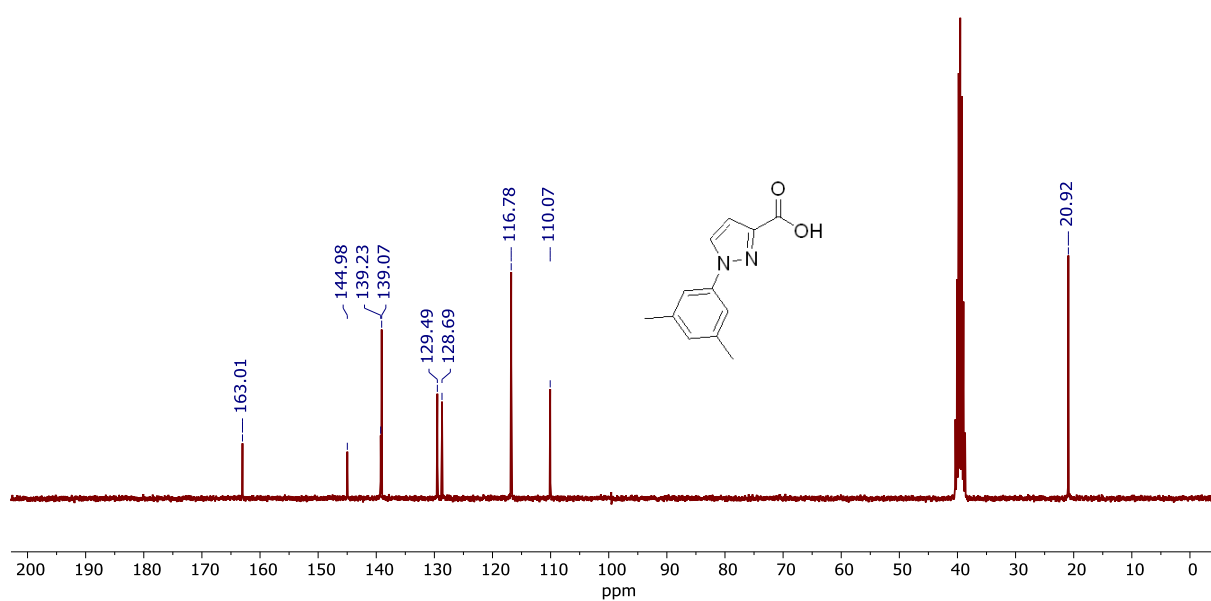

**Figure S11:**  $^{13}\text{C}\{^1\text{H}\}$  NMR spectrum (DMSO- $d_6$ , 298 K, 75 MHz) of **1f**.

## Synthesis of carboxylic acid **1g**

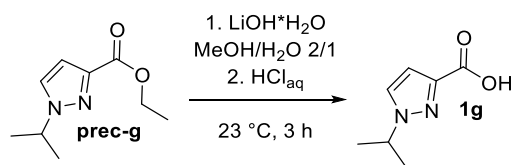

**Prec-g** (500 mg, 2.75 mmol) was dissolved in a mixture of MeOH/H<sub>2</sub>O (2:1 v/v, 5 mL) and lithium hydroxide monohydrate (230 mg, 5.00 mmol) was added. After stirring the mixture for 3 h at rt, it was extracted with CH<sub>2</sub>Cl<sub>2</sub> (3 x 20 mL). The organic fractions were combined, dried over MgSO<sub>4</sub>, filtered, and dried under vacuo to yield **1g** as a colorless solid (405 mg, 95%). The carboxylic acid **1g** was used for the next step without any further purification. NMR data in agreement with those in the literature.<sup>S6</sup> <sup>1</sup>H NMR (300 MHz, DMSO-*d*<sub>6</sub>, 298K)  $\delta$  = 7.85 (d, <sup>3</sup>*J*<sub>HH</sub> = 2.4 Hz, 1H, CH<sub>prz</sub>), 6.66 (d, <sup>3</sup>*J*<sub>HH</sub> = 2.3 Hz, 1H, CH<sub>prz</sub>), 4.56 (hept, <sup>3</sup>*J*<sub>HH</sub> = 6.7 Hz, 1H, *i*Pr-CH), 1.49 (d, <sup>3</sup>*J*<sub>HH</sub> = 6.7 Hz, 6H, *i*Pr-CH<sub>3</sub>) ppm.

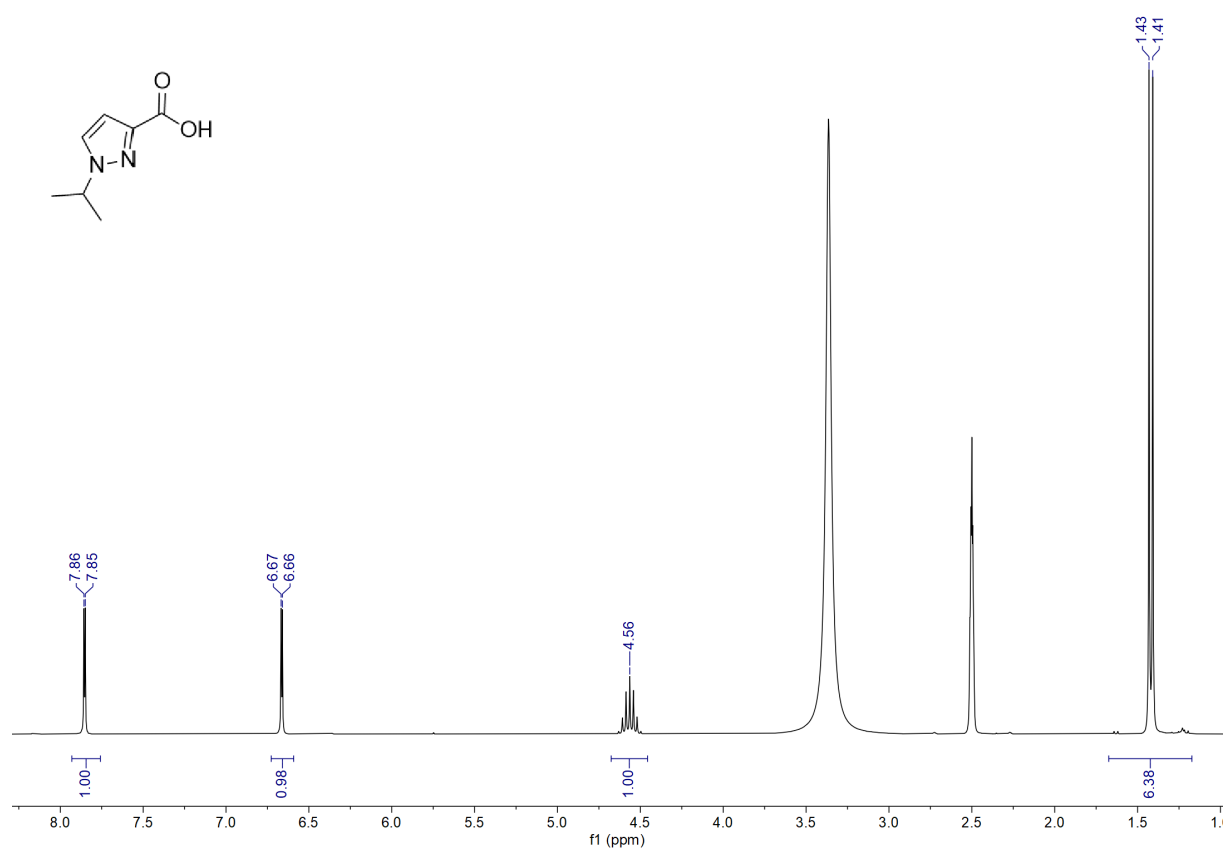

**Figure S12:** <sup>1</sup>H NMR spectrum (DMSO-*d*<sub>6</sub>, 298 K, 300 MHz) of **1g**.

### S.1.4 Synthesis of pyridine carboxamides 2a–f

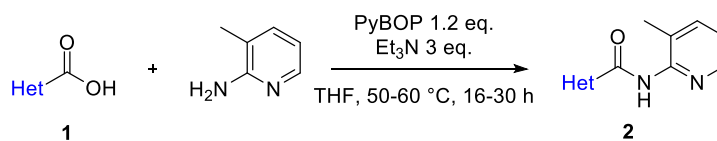

**Scheme S1:** General procedure for the preparation of pyridine carboxamides **2a–f**.

**General procedure I:** To a solution of the carboxylic acid (10 mmol, 1 eq.), benzotriazol-1-yloxytripyrrolidinophosphonium hexafluorophosphate (PyBOP; 6.24 g, 12.5 mmol, 1.2 eq.) and the appropriate aminopyridine (10 to 11 mmol, 1 to 1.1 eq.) in dry THF (20 mL) was added Et<sub>3</sub>N (4.18 mL, 30 mmol, 3 eq.). The resulting mixture was stirred under the conditions (temperature, time) as specified. After cooling to room temperature, H<sub>2</sub>O (40 mL) was added and the mixture was extracted with EtOAc (3 x 20 mL). The combined organic layers were washed with brine (20 mL), dried over MgSO<sub>4</sub>, filtered, and concentrated under vacuo. The resulting brownish residue was purified by flash column chromatography (SiO<sub>2</sub>) to yield **2**.

#### Synthesis of pyridine carboxamide **2a**

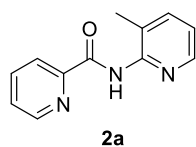

**2a** was prepared based on the previously reported procedure<sup>S7</sup> from picolinic acid (2.0 g, 16.3 mmol) and 3-methylpyridin-2-amine (1.65 mL, 16.3 mmol) at 50°C for 16 h. The resulting waxy solid was purified by gradient FCC (0 to 100% EtOAc in n-hexane) to yield compound **2a** as an off-white solid (2.77 g, 80%). Analytical data are in accordance with literature.<sup>S7</sup> <sup>1</sup>H NMR (300 MHz, DMSO-*d*<sub>6</sub>, 298K)  $\delta$  = 10.53 (s, 1H, NH), 8.74 (ddd,  $J_{HH}$  = 4.8, 1.7, 1.0 Hz, 1H, CH<sub>py</sub>), 8.31 (dd,  $J_{HH}$  = 5.0, 1.8 Hz, 1H, CH<sub>pyr</sub>), 8.14 (d,  $^3J_{HH}$  = 7.7 Hz, 1H, CH<sub>py</sub>), 8.07 (td,  $J_{HH}$  = 7.6, 1.7 Hz, 1H, CH<sub>py</sub>), 7.74 (dd,  $J_{HH}$  = 7.6, 1.8 Hz, 1H, CH<sub>pyr</sub>), 7.69 (ddd,  $J_{HH}$  = 7.4, 4.8, 1.4 Hz, 1H, CH<sub>py</sub>), 7.26 (dd,  $^3J_{HH}$  = 7.5, 4.8 Hz, 1H, CH<sub>pyr</sub>), 2.25 (s, 3H, CH<sub>3</sub>) ppm.

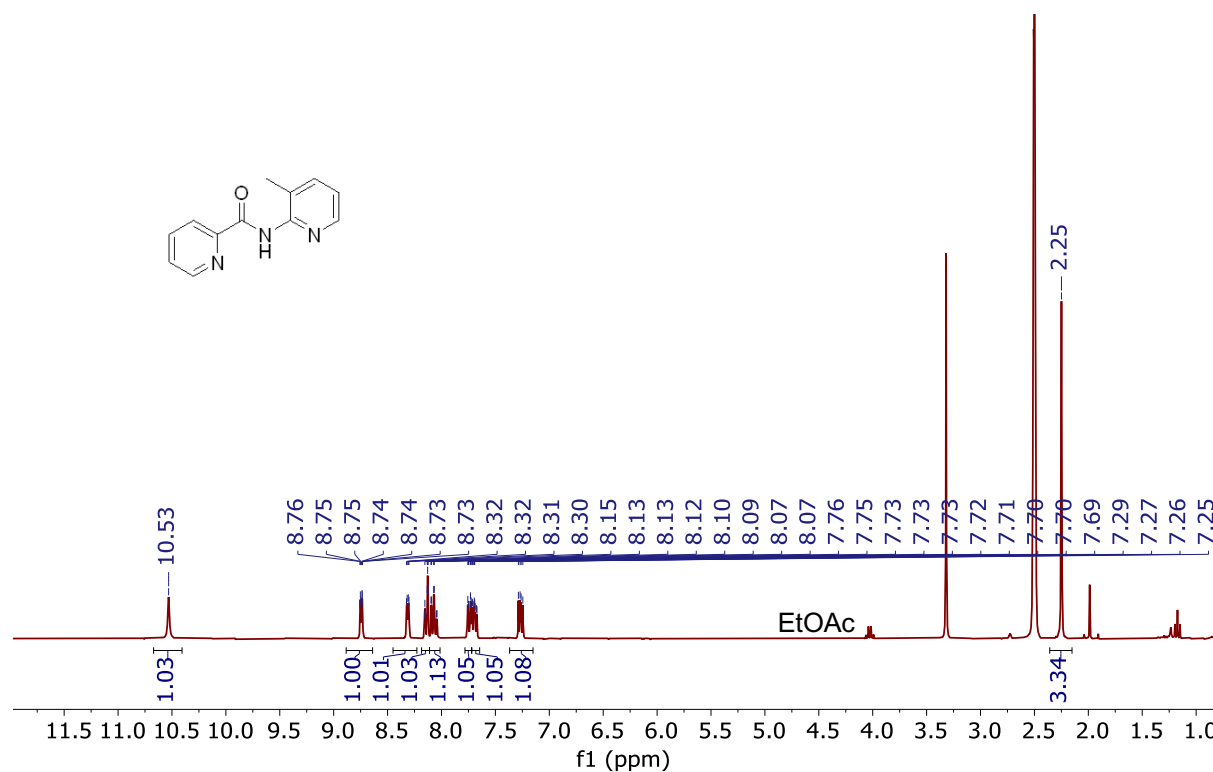

**Figure S13:**  $^1\text{H}$  NMR spectrum ( $\text{DMSO-}d_6$ , 298 K, 300 MHz) of **2a**.

#### Synthesis of pyridine carboxamide **2b**

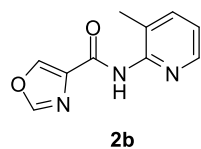

**2b** was prepared according to the general procedure I from oxazol-4-carboxylic acid (1.13 g, 10 mmol) and 2-amino-3-methylpyridine (1.01 mL, 10 mmol) at 60 °C for 30 h. The residue was purified by gradient FCC (0 to 100% EtOAc in pentane; rf 0.5 in EtOAc) to yield **2b** as an off-white solid (1.36 g, 67%).  $^1\text{H}$  NMR (400 MHz,  $\text{DMSO-}d_6$ , 298K)  $\delta$  = 10.20 (s, 1H, NH), 8.81 (d,  $^4J_{\text{HH}} = 1.0$  Hz, 1H,  $\text{CH}_{\text{oxa}}$ ), 8.60 (d,  $^4J_{\text{HH}} = 1.0$  Hz, 1H,  $\text{CH}_{\text{oxa}}$ ), 8.31 (dd,  $J_{\text{HH}} = 4.8, 1.8$  Hz, 1H,  $\text{CH}_{\text{pyr}}$ ), 7.73 (dd,  $J_{\text{HH}} = 7.5, 1.8$  Hz, 1H,  $\text{CH}_{\text{pyr}}$ ), 7.27 (dd,  $J_{\text{HH}} = 7.5, 4.8$  Hz, 1H,  $\text{CH}_{\text{pyr}}$ ), 2.22 (s, 3H,  $\text{CH}_3$ ) ppm.  $^{13}\text{C}\{^1\text{H}\}$  NMR (101 MHz,  $\text{DMSO-}d_6$ , 298K)  $\delta$  = 159.13 (CO), 152.90 ( $\text{CH}_{\text{oxa}}$ ), 149.74 ( $\text{C}_{\text{pyr}}$ ), 146.48 ( $\text{CH}_{\text{pyr}}$ ), 143.32 ( $\text{CH}_{\text{oxa}}$ ), 139.78 ( $\text{CH}_{\text{pyr}}$ ), 135.67 ( $\text{C}_{\text{oxa}}$ ), 130.16 ( $\text{C}_{\text{pyr-Me}}$ ), 122.84 ( $\text{CH}_{\text{pyr}}$ ), 17.92 (pyr- $\text{CH}_3$ ) ppm. HR-MS (m/z): calculated for  $\text{C}_{10}\text{H}_{10}\text{N}_3\text{O}_2$   $[\text{M}+\text{H}]^+$  = 204.0768; found: 204.0759.

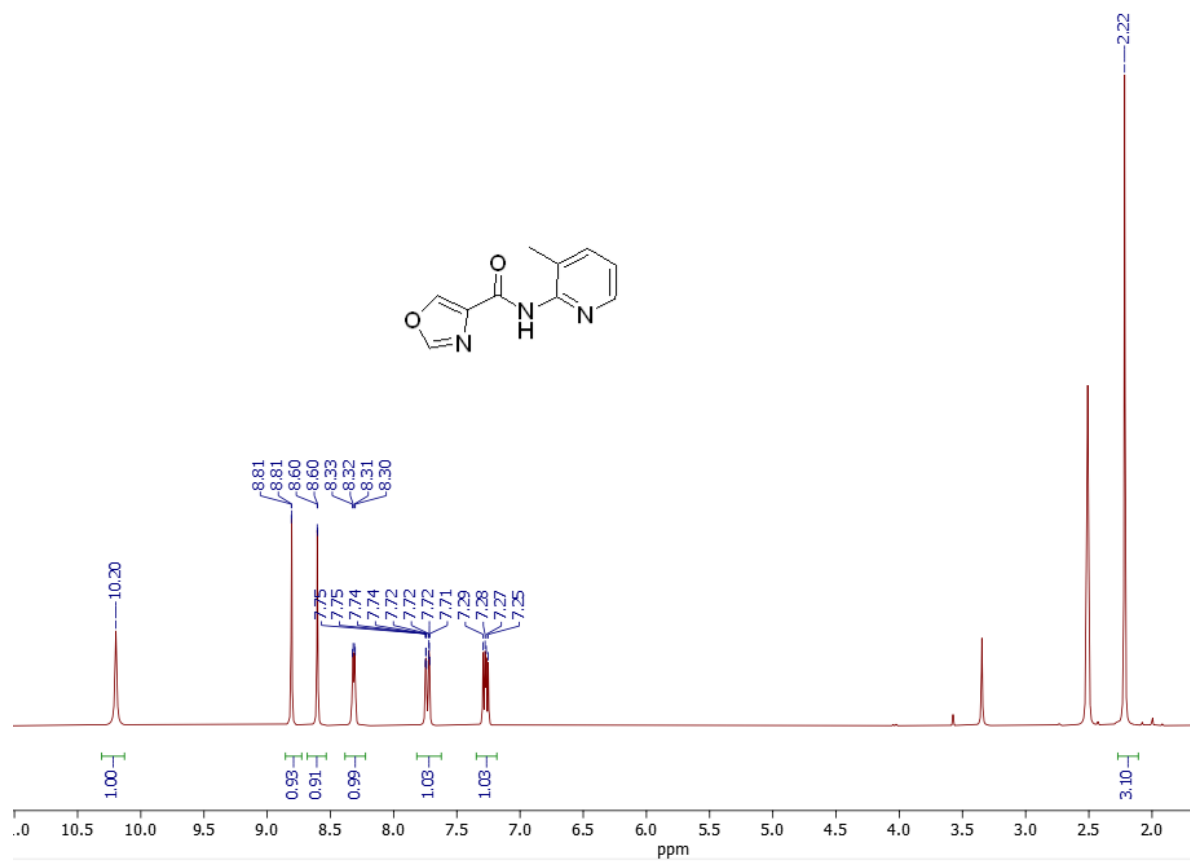

**Figure S14:**  $^1\text{H}$  NMR spectrum (DMSO- $d_6$ , 298 K, 400 MHz) of 2b.

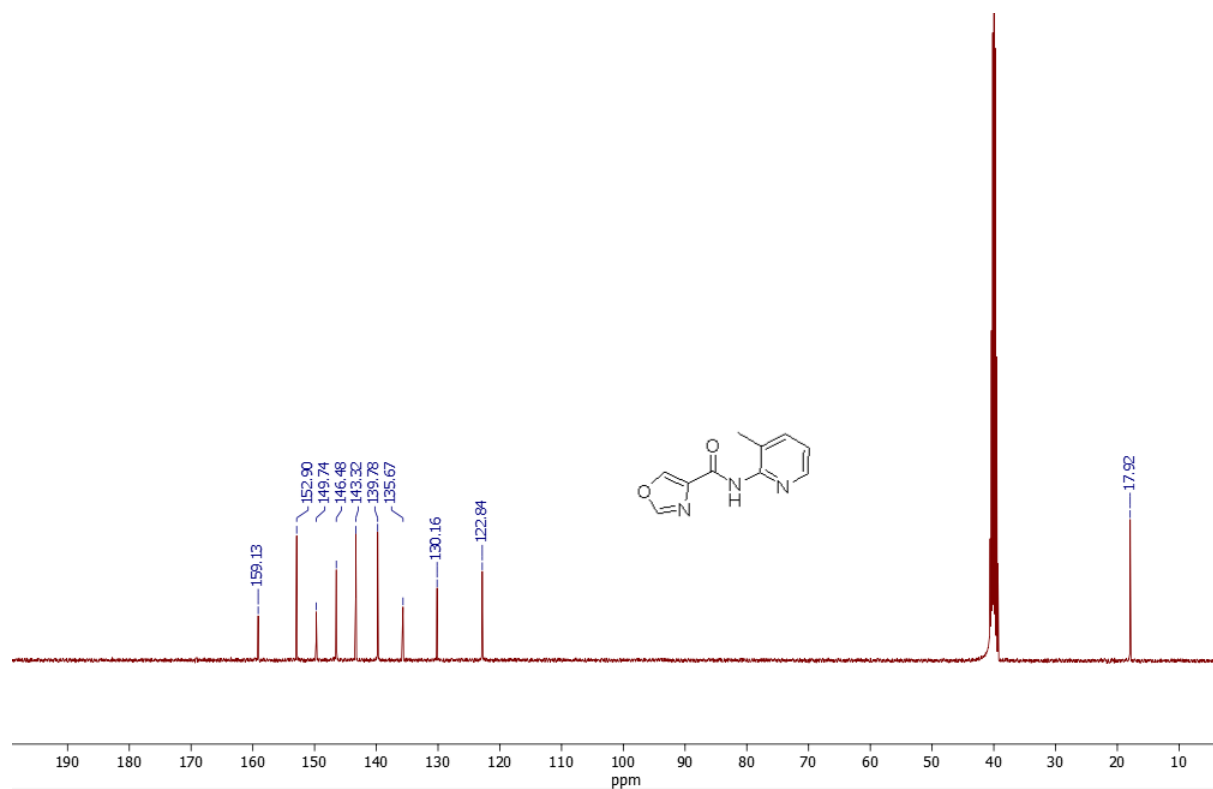

**Figure S15:**  $^{13}\text{C}\{^1\text{H}\}$  NMR spectrum (DMSO- $d_6$ , 298 K, 101 MHz) of 2b.



### Synthesis of pyridine carboxamide **2c**

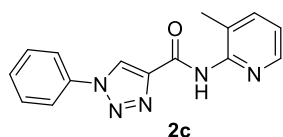

**2c** was prepared according to the general procedure I from 1-phenyl-1H-1,2,3-triazole-4-carboxylic acid (1.10 g, 5.81 mmol) and 2-amino-3-methylpyridine (650  $\mu$ L, 6.40 mmol) at 23  $^{\circ}$ C for 18 h. The residue was purified by gradient FCC (50 to 100% EtOAc in pentane, rf 0.2 in pentane/EtOAc 1:1) to yield **2c** as a white solid (1.25 g, 77%).  $^1\text{H}$  NMR (400 MHz, DMSO- $d_6$ , 298K)  $\delta$  = 10.58 (s, 1H, NH), 9.45 (s, 1H,  $\text{CH}_{\text{trz}}$ ), 8.34 (d,  $^3J_{\text{HH}}$  = 4.8 Hz, 1H,  $\text{CH}_{\text{pyr}}$ ), 8.01 (d,  $^3J_{\text{HH}}$  = 7.8 Hz, 2H,  $\text{CH}_{\text{phe}}$ ), 7.75 (d,  $^3J_{\text{HH}}$  = 7.6 Hz, 1H,  $\text{CH}_{\text{pyr}}$ ), 7.65 (t,  $^3J_{\text{HH}}$  = 7.8 Hz, 2H,  $\text{CH}_{\text{phe}}$ ), 7.56 (t,  $^3J_{\text{HH}}$  = 7.8 Hz, 1H,  $\text{CH}_{\text{phe}}$ ), 7.29 (dd,  $^3J_{\text{HH}}$  = 7.6, 4.8 Hz, 1H,  $\text{CH}_{\text{pyr}}$ ), 2.27 (s, 3H,  $\text{CH}_3$ ) ppm.  $^{13}\text{C}\{^1\text{H}\}$  NMR (101 MHz, DMSO- $d_6$ , 298K)  $\delta$  = 158.73 (CO), 149.88 ( $\text{C}_{\text{pyr}}$ ), 146.54 ( $\text{CH}_{\text{pyr}}$ ), 143.69 ( $\text{C}_{\text{trz}}$ ), 139.80 ( $\text{CH}_{\text{pyr}}$ ), 136.77 ( $\text{C}_{\text{phe}}$ ), 130.44 ( $\text{CH}_{\text{phe}}$ ), 130.25 ( $\text{C}_{\text{pyr-Me}}$ ), 129.73 ( $\text{CH}_{\text{phe}}$ ), 126.03 ( $\text{CH}_{\text{trz}}$ ), 122.87 ( $\text{CH}_{\text{pyr}}$ ), 121.05 ( $\text{CH}_{\text{phe}}$ ), 17.98 ( $\text{CH}_3$ ) ppm. HR-MS (m/z): calcd. for  $\text{C}_{15}\text{H}_{14}\text{N}_5\text{O}$   $[\text{M}+\text{H}]^+$  = 280.1193; found: 280.1182.

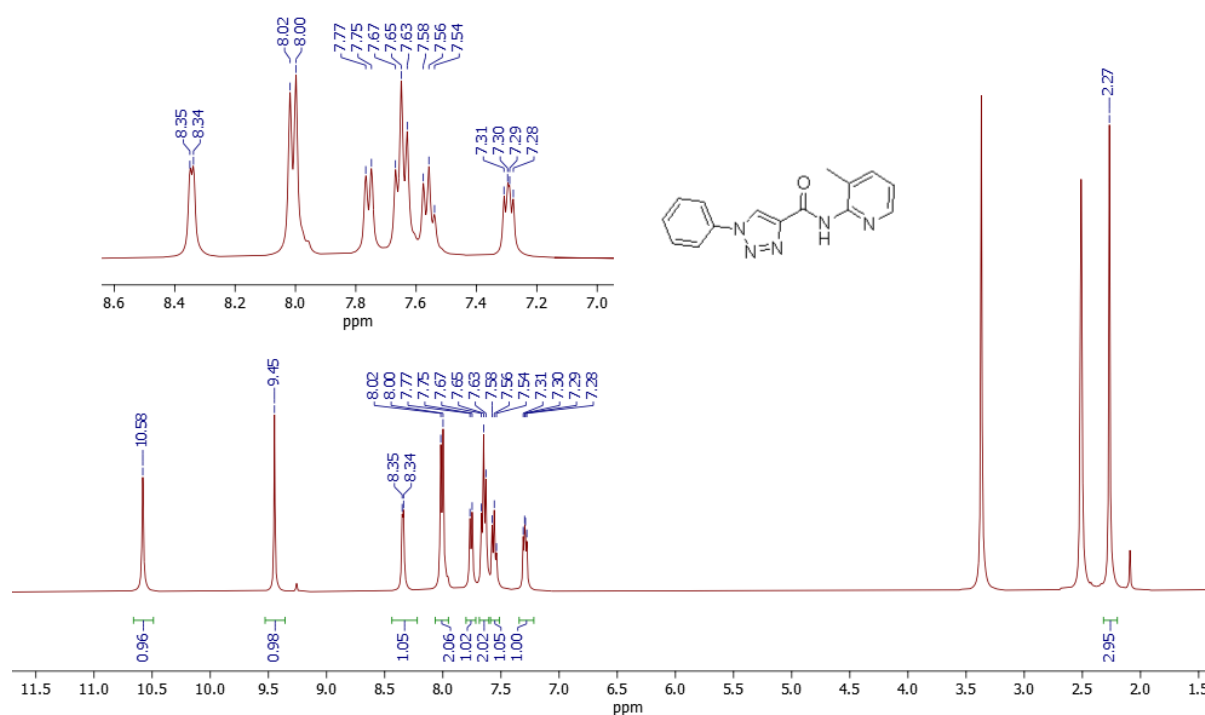

Figure S16:  $^1\text{H}$  NMR spectrum (DMSO- $d_6$ , 298 K, 400 MHz) of **2c**

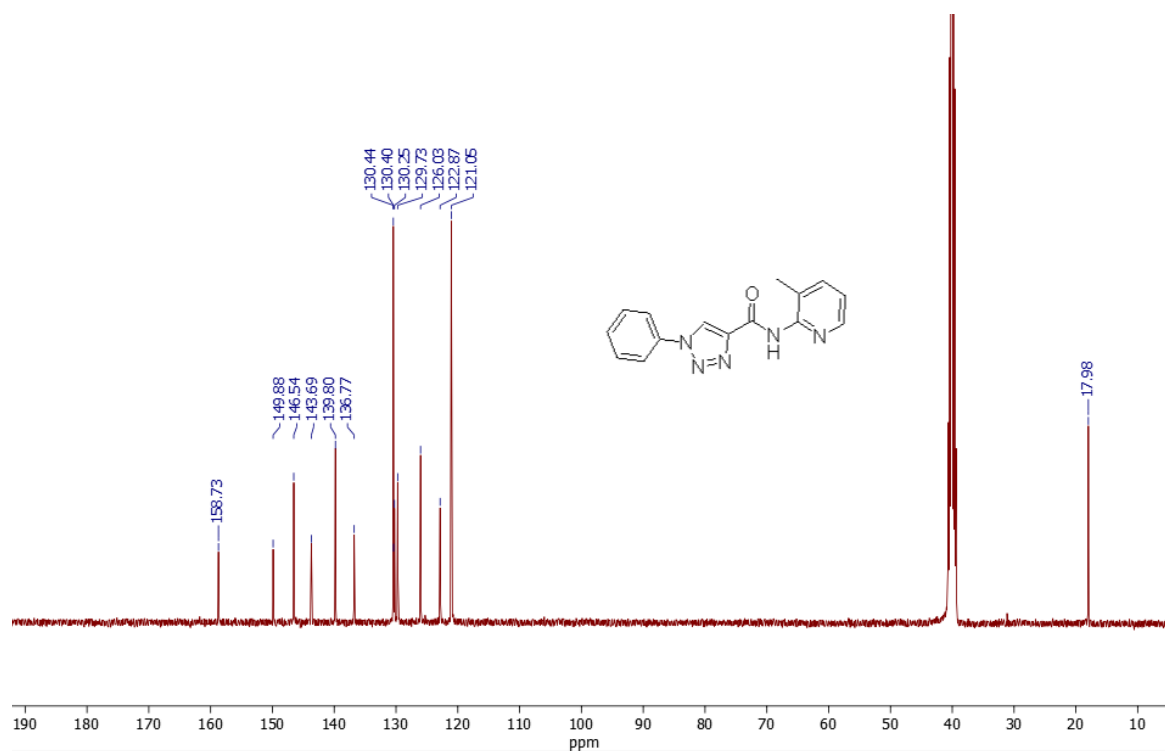

**Figure S17:**  $^{13}\text{C}\{^1\text{H}\}$  NMR spectrum (DMSO- $d_6$ , 298 K, 101 MHz) of **2c**

### Synthesis of pyridine carboxamide **2d**

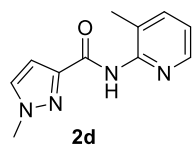

**2d** was prepared according to the general procedure I from 1-methyl-1H-pyrazole-3-carboxylic acid (950 mg, 10 mmol) and 2-amino-3-methylpyridine (1 mL, 10 mmol) at 60 °C for 30 h. The resulting waxy solid was purified by gradient FCC (0 to 8% MeOH in EtOAc; 3rd fraction) to yield compound **2d** as a pale-yellow waxy solid (1.59 g, 62%).  $^1\text{H}$  NMR (400 MHz, DMSO- $d_6$ , 298 K):  $\delta$  = 9.91 (s, 1H, NH), 8.29 (dd,  $J_{\text{HH}}$  = 4.8, 1.8 Hz, 1H,  $\text{CH}_{\text{pyr}}$ ), 7.85 (d,  $^3J_{\text{HH}}$  = 2.3 Hz, 1H, CH), 7.71 (dd,  $J_{\text{HH}}$  = 7.5, 1.8 Hz, 1H,  $\text{CH}_{\text{pyr}}$ ), 7.24 (dd,  $^3J_{\text{HH}}$  = 7.5, 4.8 Hz, 1H,  $\text{CH}_{\text{pyr}}$ ), 6.78 (d,  $^3J_{\text{HH}}$  = 2.3 Hz, 1H,  $\text{CH}_{\text{prz}}$ ), 3.96 (s, 3H,  $\text{NCH}_3$ ), 2.21 (s, 3H,  $\text{pyr-CH}_3$ ) ppm.  $^{13}\text{C}\{^1\text{H}\}$  NMR (101 MHz, DMSO- $d_6$ , 298K)  $\delta$  = 159.85 (CO), 149.77 ( $\text{C}_{\text{pyr}}$ ), 145.86 ( $\text{CH}_{\text{pyr}}$ ), 145.62 ( $\text{C}_{\text{prz}}$ ), 139.11 ( $\text{CH}_{\text{pyr}}$ ), 132.79 ( $\text{CH}_{\text{prz}}$ ), 129.50 ( $\text{C}_{\text{pyr-Me}}$ ), 121.97 ( $\text{CH}_{\text{pyr}}$ ), 106.55 ( $\text{CH}_{\text{prz}}$ ), 39.02 (N- $\text{CH}_3$ ), 17.56 ( $\text{pyr-CH}_3$ ) ppm. HR-MS (m/z): calculated for  $\text{C}_{11}\text{H}_{13}\text{N}_4\text{O}$   $[\text{M}+\text{H}]^+$  = 217.1084; found: 217.1078.

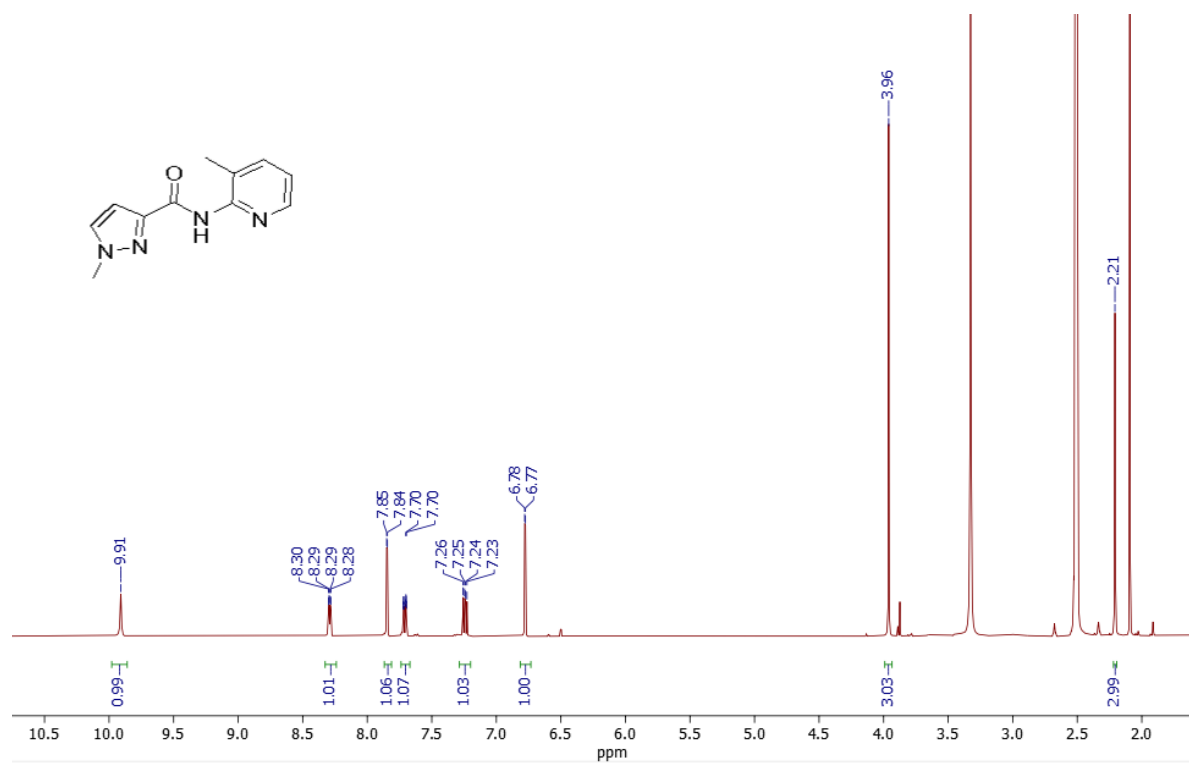

Figure S18:  $^1\text{H}$  NMR spectrum (DMSO- $d_6$ , 298 K, 400 MHz) of **2d**

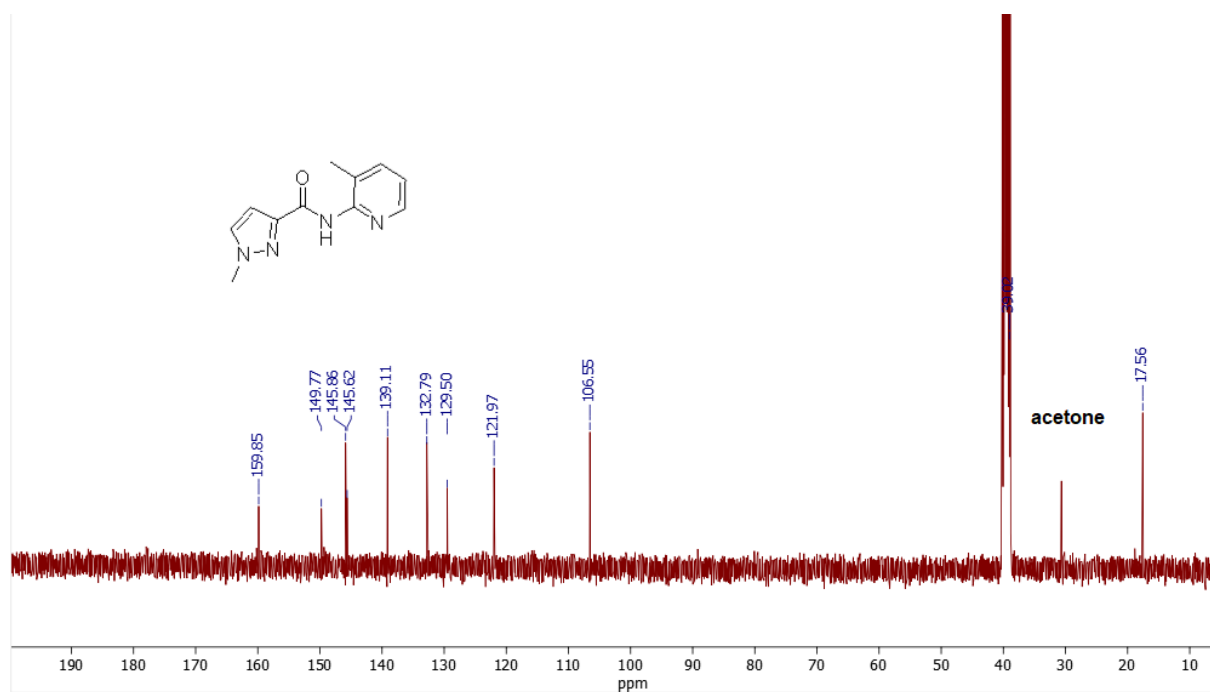

Figure S19:  $^{13}\text{C}\{^1\text{H}\}$  NMR spectrum (DMSO- $d_6$ , 298 K, 101 MHz) of **2d**

### Synthesis of pyridine carboxamide **2e**

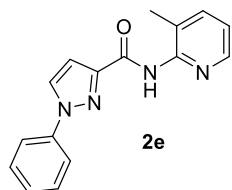

**2e** was prepared according to the general procedure I from **1e** (1.50 g, 8.0 mmol) and 2-amino-3-methylpyridine (890  $\mu$ L, 8.8 mmol) at 45 °C for 30 h. The residue was purified by FCC (0 to 100% EtOAc in pentane) to yield **2e** as a yellow solid (1.69 g, 76%).  $^1\text{H}$  NMR (400 MHz,  $\text{DMSO-}d_6$ , 298K)  $\delta$  = 10.29 (s, 1H, NH), 8.67 (d,  $^3J_{\text{HH}}$  = 2.6 Hz, 1H,  $\text{CH}_{\text{prz}}$ ), 8.34 (dd,  $J_{\text{HH}}$  = 4.8, 1.9 Hz, 1H,  $\text{CH}_{\text{pyr}}$ ), 8.08 – 7.97 (m, 2H,  $\text{CH}_{\text{phe}}$ ), 7.75 (dd,  $J_{\text{HH}}$  = 7.5, 1.9 Hz, 1H,  $\text{CH}_{\text{pyr}}$ ), 7.63 – 7.49 (m, 2H,  $\text{CH}_{\text{phe}}$ ), 7.46 – 7.35 (m, 1H,  $\text{CH}_{\text{phe}}$ ), 7.28 (dd,  $^3J_{\text{HH}}$  = 7.5, 4.8 Hz, 1H,  $\text{CH}_{\text{pyr}}$ ), 7.06 (d,  $^3J_{\text{HH}}$  = 2.6 Hz, 1H,  $\text{CH}_{\text{prz}}$ ), 2.25 (s, 3H, pyridine- $\text{CH}_3$ ) ppm.  $^{13}\text{C}\{^1\text{H}\}$  NMR (101 MHz,  $\text{DMSO-}d_6$ , 298K)  $\delta$  = 159.65 (CO), 149.65 ( $\text{C}_{\text{pyr}}$ ), 147.21 ( $\text{C}_{\text{prz}}$ ), 145.94 ( $\text{CH}_{\text{pyr}}$ ), 139.26 ( $\text{CH}_{\text{pyr}}$ ), 139.23 ( $\text{C}_{\text{phe}}$ ), 129.74 ( $\text{CH}_{\text{prz}}$ ), 129.67 ( $\text{C}_{\text{pyr-Me}}$ ), 129.55 ( $\text{CH}_{\text{phe}}$ ), 127.16 ( $\text{CH}_{\text{phe}}$ ), 122.16 ( $\text{CH}_{\text{pyr}}$ ), 119.00 ( $\text{CH}_{\text{phe}}$ ), 108.45 ( $\text{CH}_{\text{prz}}$ ), 17.61 ( $\text{CH}_3$ ) ppm. HR-MS (m/z): calculated for  $\text{C}_{16}\text{H}_{15}\text{N}_4\text{O}$   $[\text{M}+\text{H}]^+ = 279.1241$ ; found: 279.1228.

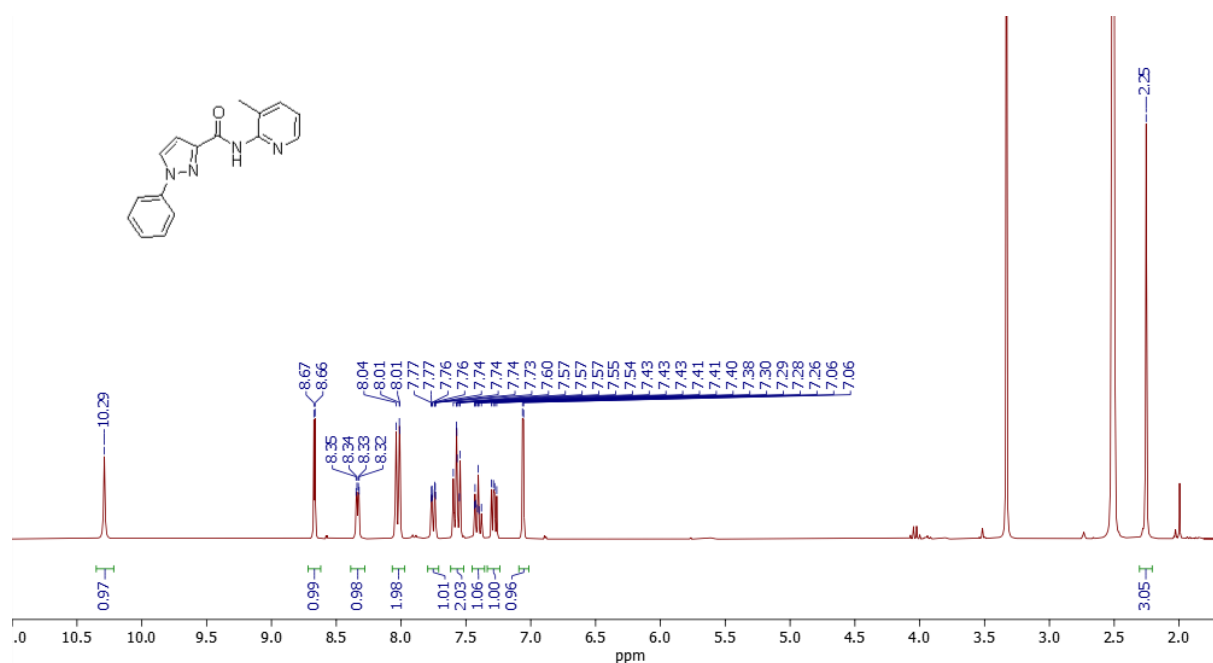

**Figure S20:**  $^1\text{H}$  NMR spectrum ( $\text{DMSO-}d_6$ , 298 K, 400 MHz) of **2e**

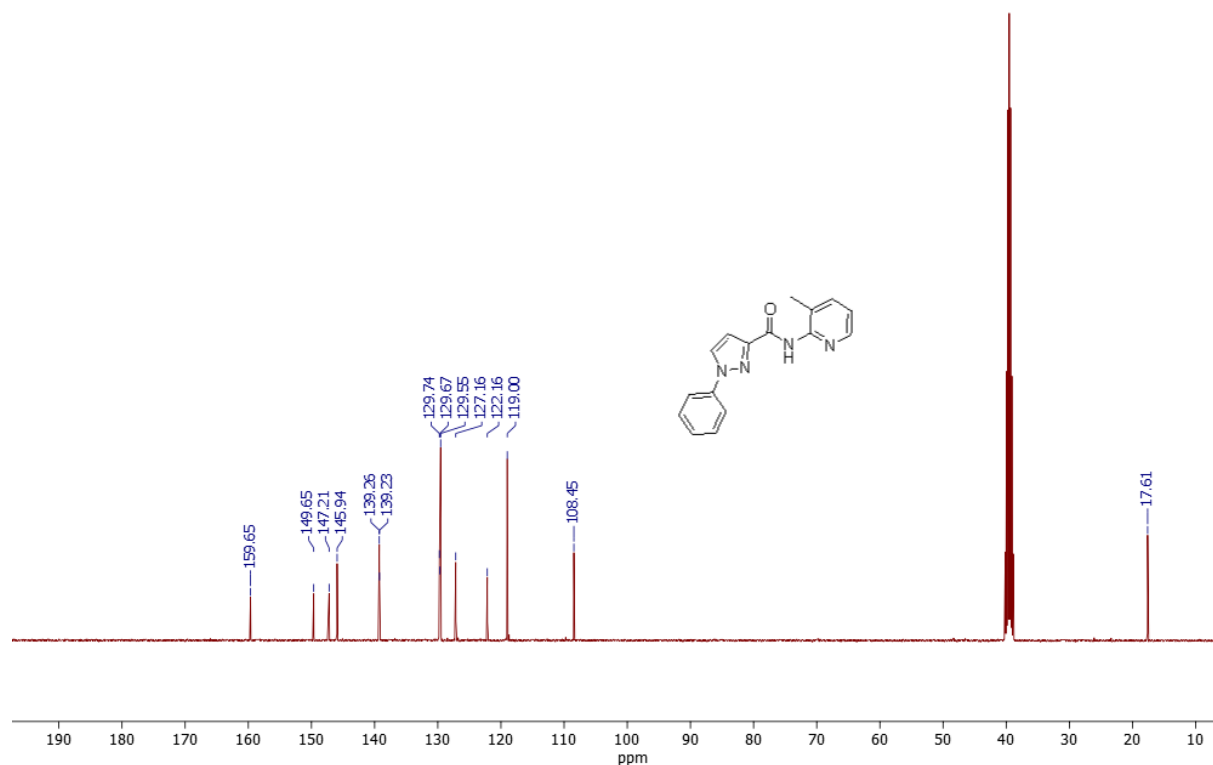

**Figure S21:**  $^{13}\text{C}\{^1\text{H}\}$  NMR spectrum (DMSO- $d_6$ , 298 K, 101 MHz) of **2e**

### Synthesis of pyridine carboxamide **2f**

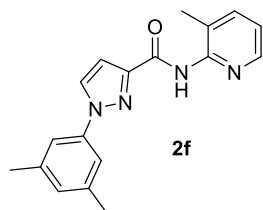

**2f** was prepared according to the general procedure I from **1f** (2.00 g, 9.25 mmol) and 2-amino-3-methylpyridine (1.00 mL, 9.88 mmol) at 45 °C for 18 h. The residue was purified by gradient FCC (20 to 50% EtOAc in pentane, rf 0.7 in EtOAc/pentane 1:1) to yield **2f** as a whitish solid (1.90 g, 67%).  $^1\text{H}$  NMR (400 MHz, DMSO- $d_6$ , 298K)  $\delta$  = 10.28 (s, 1H, NH), 8.60 (d,  $^3J_{\text{HH}} = 2.6$  Hz, 1H,  $\text{CH}_{\text{prz}}$ ), 8.33 (dd,  $J_{\text{HH}} = 4.8, 1.8$  Hz, 1H,  $\text{CH}_{\text{pyr}}$ ), 7.75 (dd,  $J_{\text{HH}} = 7.5, 1.8$ , 1H,  $\text{CH}_{\text{pyr}}$ ), 7.66 (s, 2H,  $\text{CH}_{\text{phe}}$ ), 7.28 (dd,  $^3J_{\text{HH}} = 7.5, 4.8$  Hz, 1H,  $\text{CH}_{\text{pyr}}$ ), 7.04 (m, 1H,  $\text{CH}_{\text{phe}}$ ), 7.02 (d,  $^3J_{\text{HH}} = 2.6$  Hz, 1H,  $\text{CH}_{\text{prz}}$ ), 2.37 (s, 6H, phe- $\text{CH}_3$ ), 2.25 (s, 3H, pyr- $\text{CH}_3$ ) ppm.  $^{13}\text{C}\{^1\text{H}\}$  NMR (101 MHz, DMSO- $d_6$ , 298K)  $\delta$  = 159.69 (CO), 149.67 ( $\text{C}_{\text{pyr}}$ ), 146.94 ( $\text{C}_{\text{prz}}$ ), 145.90 ( $\text{CH}_{\text{pyr}}$ ), 139.24 ( $\text{CH}_{\text{pyr}}$ ), 139.16 ( $\text{C}_{\text{phe}}$ ), 138.90 ( $\text{C}_{\text{phe-Me}}$ ), 129.71 ( $\text{C}_{\text{pyr-Me}}$ ), 129.56 ( $\text{CH}_{\text{prz}}$ ), 128.47 ( $\text{CH}_{\text{phe}}$ ), 122.14 ( $\text{CH}_{\text{pyr}}$ ), 116.66 ( $\text{CH}_{\text{phe}}$ ), 108.24 ( $\text{CH}_{\text{prz}}$ ), 20.89 (phe- $\text{CH}_3$ ), 17.62 (pyr- $\text{CH}_3$ ) ppm. HR-MS (m/z): calculated for  $\text{C}_{18}\text{H}_{19}\text{N}_4\text{O}$   $[\text{M}+\text{H}]^+ = 307.1554$ ; found: 307.1541.

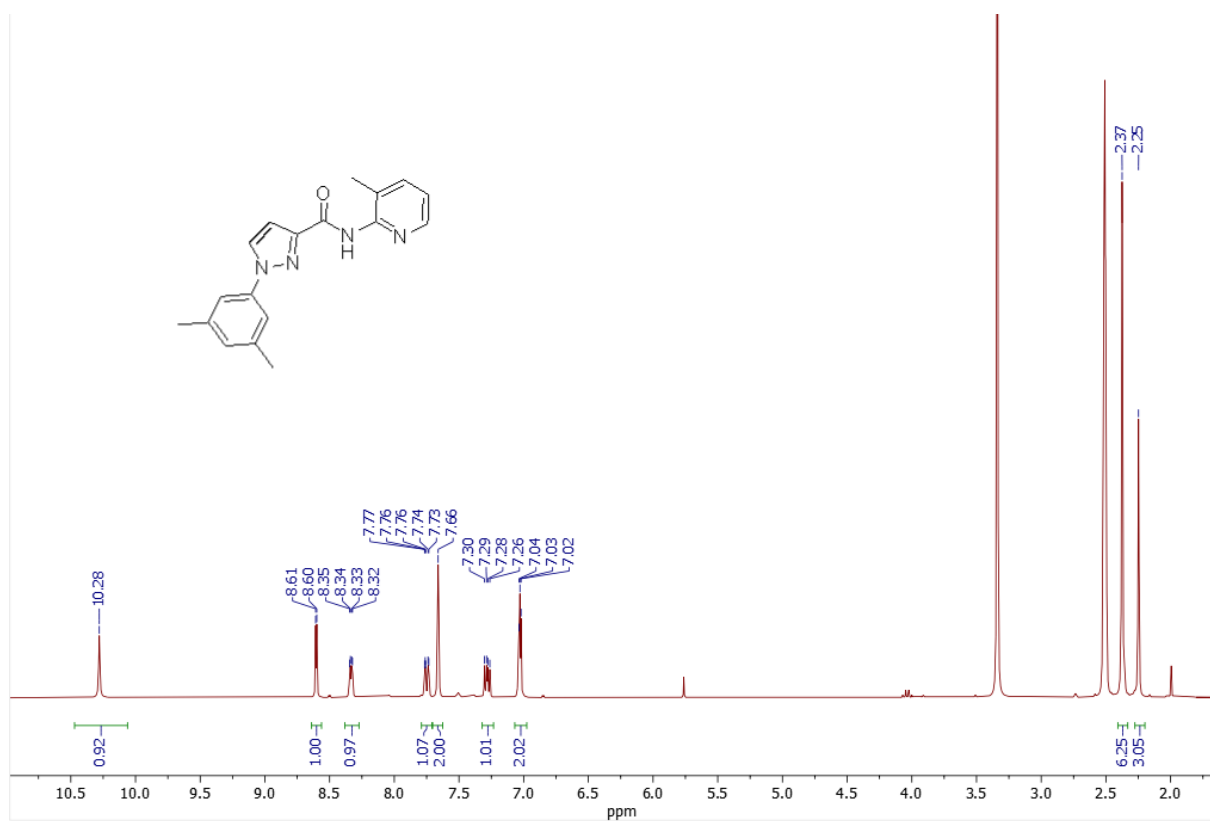

**Figure S22:**  $^1\text{H}$  NMR spectrum (DMSO- $d_6$ , 298 K, 400 MHz) of **2f**

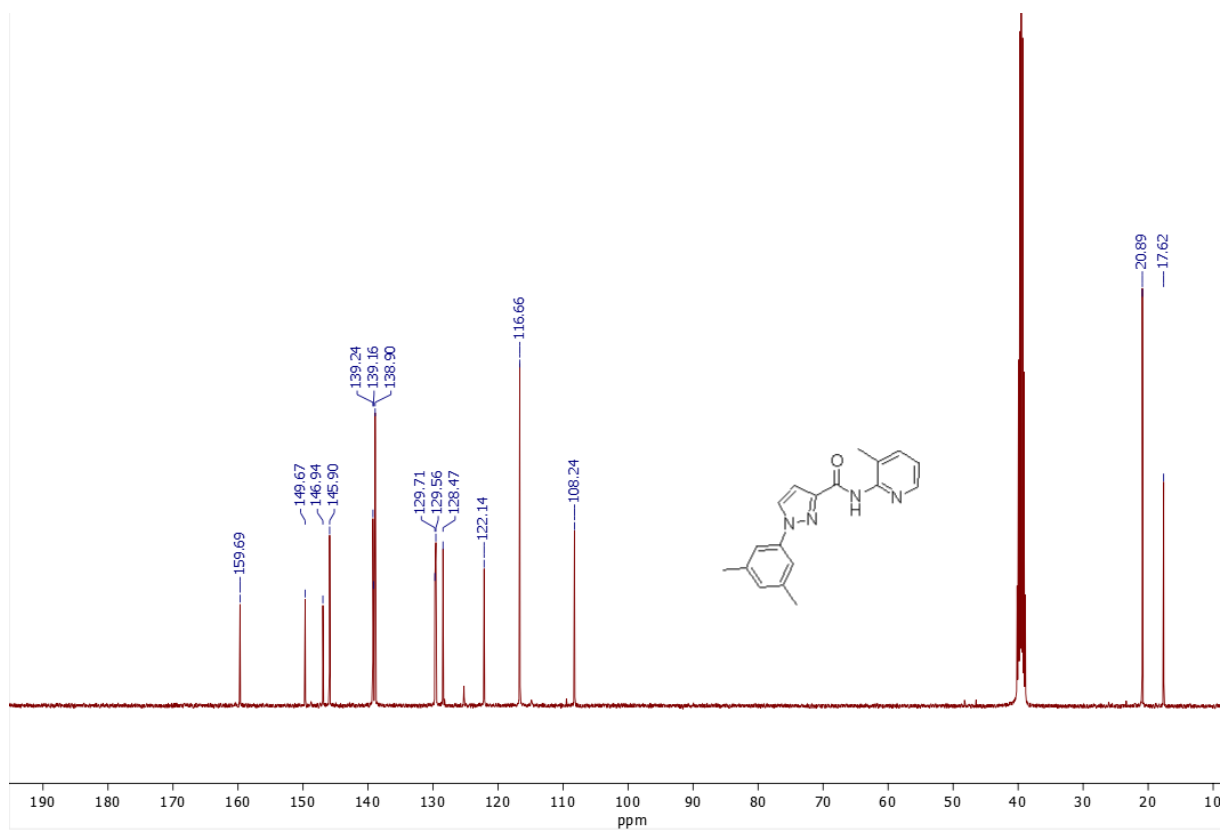

**Figure S23:**  $^{13}\text{C}\{^1\text{H}\}$  NMR spectrum (DMSO- $d_6$ , 298 K, 101 MHz) of **2f**

### S.1.5 Synthesis of pyridinium iodide salts 3a–3g

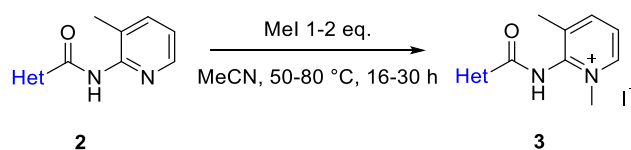

**Scheme S2:** General procedure for the preparation of pyridinium iodide salts **3a–g**.

**General procedure II:** To a solution of the pyridine carboxamide **2** (5.0 mmol, 1 eq.) in MeCN (15 mL) was added MeI (620  $\mu$ L, 10.0 mmol, 2 eq.). The resulting mixture was stirred under the conditions (temperature, time) specified, then concentrated to 5 mL, and the product was precipitated by addition of Et<sub>2</sub>O. The precipitate was collected by filtration, washed with cold Et<sub>2</sub>O, and dried in vacuo to give the title product **3**.

#### Synthesis of **3a**

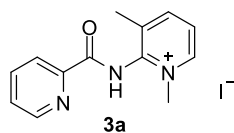

**3a** has been reported previously.<sup>S7</sup> According to the general procedure II from **2a** (2.0 g, 9.4 mmol) and MeI (1.2 mL, 18.8 mmol) at 60 °C for 16 h, salt **3a** was obtained as a yellow solid (3.1 g, 93%). Analytical data are in agreement with literature values.<sup>S7</sup> <sup>1</sup>H NMR (300 MHz, CD<sub>3</sub>CN, 298K)  $\delta$  = 10.43 (s, 1H, NH), 8.79 – 8.71 (m, 1H, CH<sub>py</sub>), 8.59 (d, <sup>3</sup>J<sub>HH</sub> = 6.1 Hz, 1H, CH<sub>pyr</sub>), 8.44 (d, <sup>3</sup>J<sub>HH</sub> = 7.9 Hz, 1H, CH<sub>pyr</sub>), 8.26 – 8.17 (m, 1H, CH<sub>py</sub>), 8.08 (td, J<sub>HH</sub> = 7.9, 1.7 Hz, 1H, CH<sub>py</sub>), 7.86 (dd, <sup>3</sup>J<sub>HH</sub> = 8.0, 6.2 Hz, 1H, CH<sub>pyr</sub>), 7.72 (ddd, J<sub>HH</sub> = 7.6, 4.8, 1.3 Hz, 1H, CH<sub>py</sub>), 4.22 (s, 3H NCH<sub>3</sub>), 2.46 (s, 3H, pyrCH<sub>3</sub>) ppm.

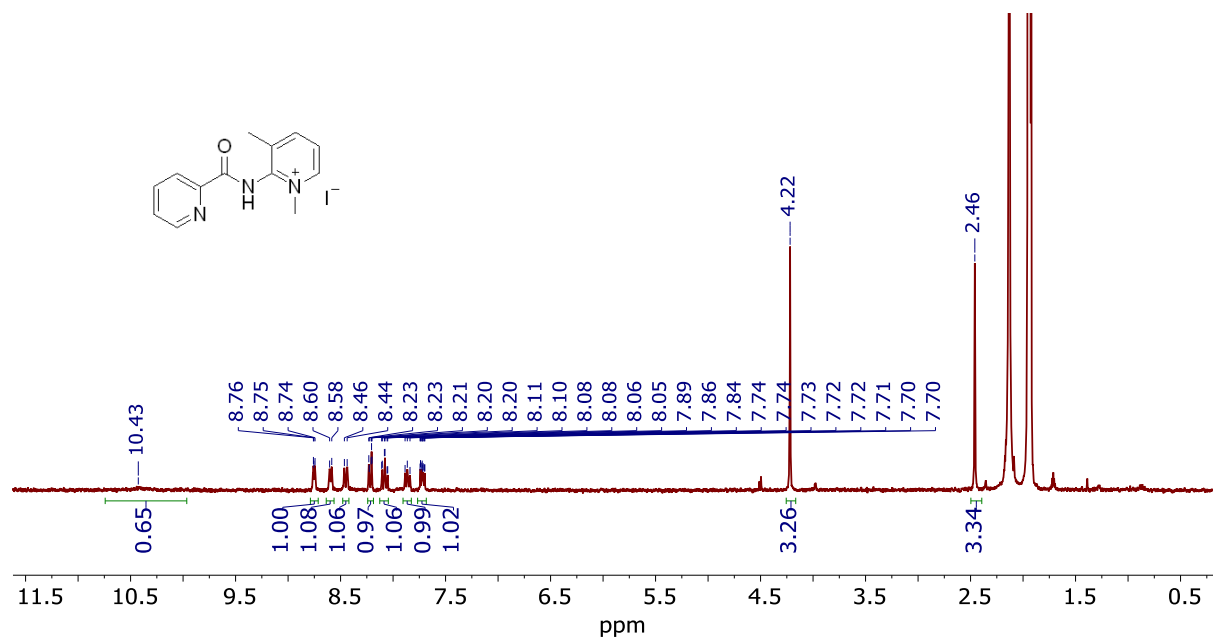

**Figure S24:** <sup>1</sup>H NMR spectrum (CD<sub>3</sub>CN, 298 K, 300 MHz) of **3a**

### Synthesis of 3b

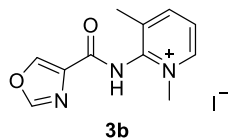

According to the general procedure II from **2b** (1.02 g, 5.0 mmol) at 70°C for 16 h, salt **3b** was obtained as a yellow solid (1.35 g, 78%). <sup>1</sup>H NMR (400 MHz, CD<sub>3</sub>CN, 298K) δ = 9.66 (s, 1H, NH), 8.66 (d, <sup>3</sup>J<sub>HH</sub> = 6.2 Hz, 1H, CH<sub>pyr</sub>), 8.64 (d, <sup>4</sup>J<sub>HH</sub> = 1.0 Hz, 1H, CH<sub>oxa</sub>), 8.46 (d, <sup>3</sup>J<sub>HH</sub> = 8.0 Hz, 1H, CH<sub>pyr</sub>), 8.25 (d, <sup>4</sup>J<sub>HH</sub> = 1.0 Hz, 1H, CH<sub>oxa</sub>), 7.88 (dd, <sup>3</sup>J<sub>HH</sub> = 8.0, 6.2 Hz, 1H, CH<sub>pyr</sub>), 4.24 (s, 3H NCH<sub>3</sub>), 2.46 (s, 3H, pyrCH<sub>3</sub>) ppm. <sup>13</sup>C{<sup>1</sup>H} NMR (101 MHz, CD<sub>3</sub>CN, 298K) δ = 159.94 (CO), 153.22 (CH<sub>oxa</sub>), 149.40 (CH<sub>pyr</sub>), 146.55 (C<sub>pyr</sub>), 145.48 (CH<sub>pyr</sub>), 145.01 (CH<sub>oxa</sub>), 139.55 (C<sub>pyr</sub>-Me), 134.89 (C<sub>oxa</sub>), 126.74 (CH<sub>pyr</sub>), 46.53 (NCH<sub>3</sub>), 18.29 (pyrCH<sub>3</sub>) ppm. HR-MS (m/z): calculated for C<sub>11</sub>H<sub>12</sub>N<sub>3</sub>O<sub>2</sub> [M-I]<sup>+</sup> = 218.0925 ; found: 218.0929.

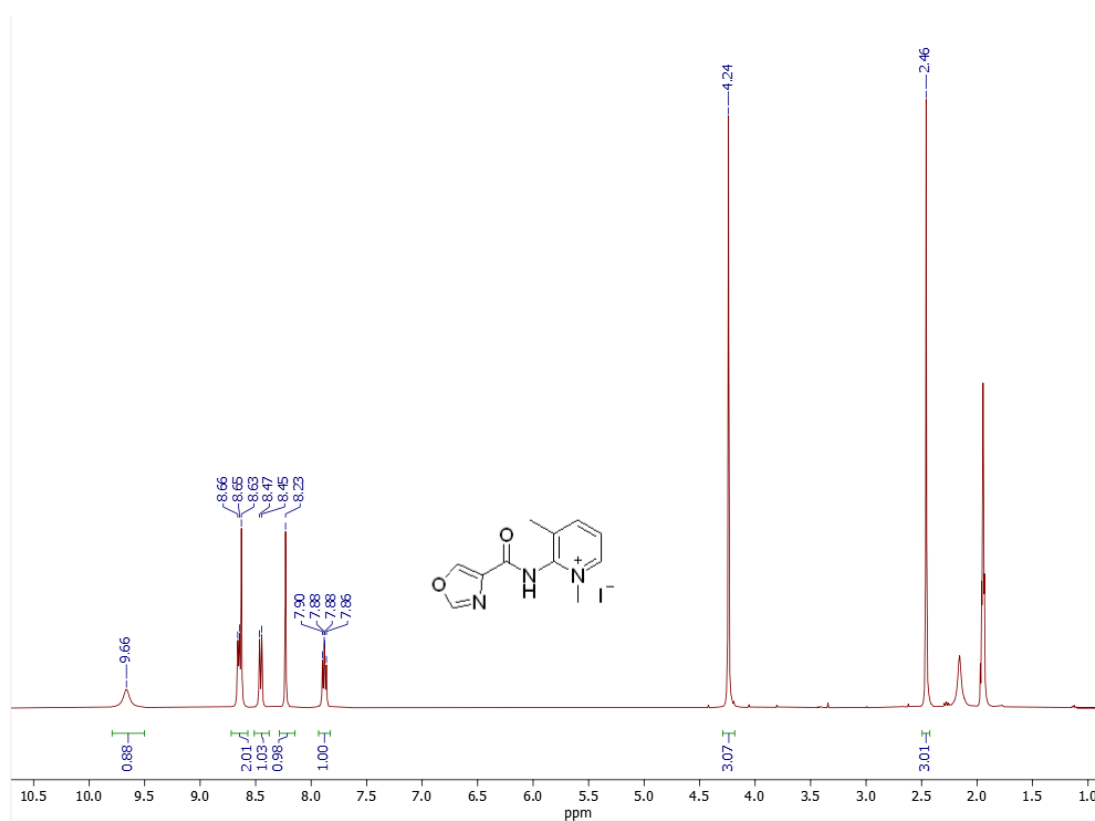

Figure S25: <sup>1</sup>H NMR spectrum (CD<sub>3</sub>CN, 298 K, 400 MHz) of **3b**



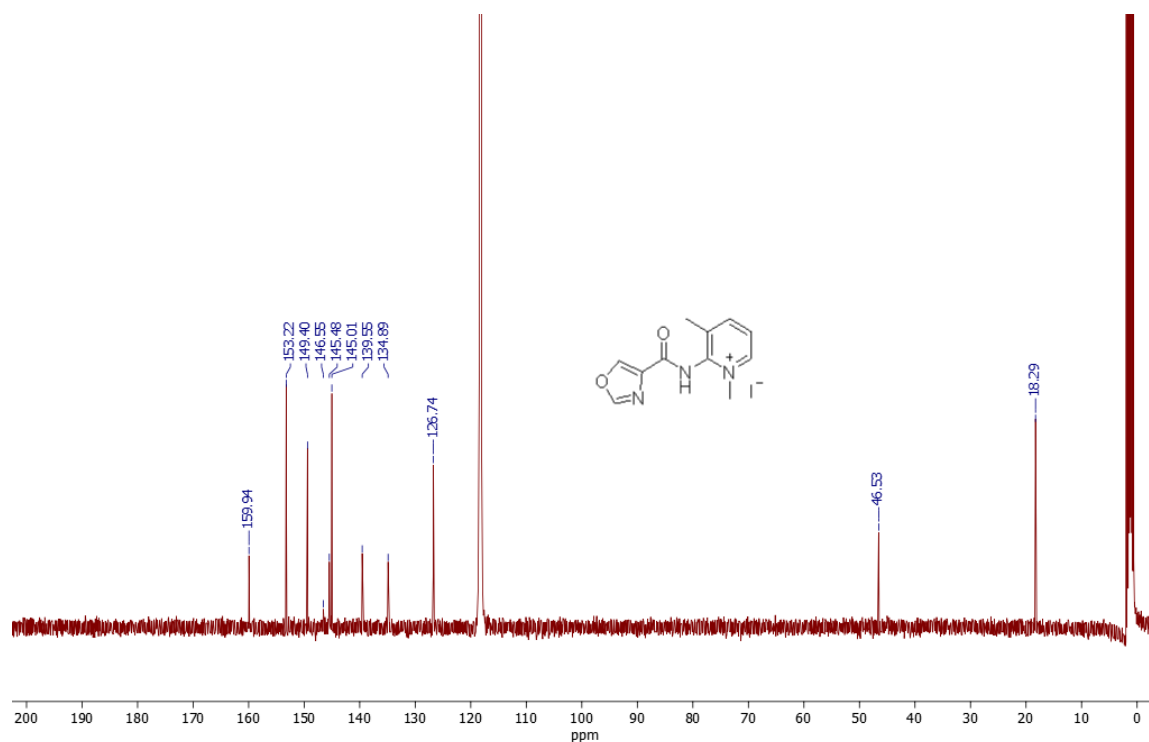

**Figure S26:**  $^{13}\text{C}\{^1\text{H}\}$  NMR spectrum ( $\text{CD}_3\text{CN}$ , 298 K, 101 MHz) of **3b**

### Synthesis of **3c**

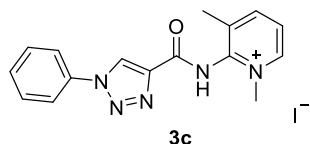

According to the general procedure II from **2c** (1.12 g, 4.0 mmol) at 60 °C for 30 h, salt **3c** was obtained as an off-white solid (1.01 g, 60%).  $^1\text{H}$  NMR (300 MHz,  $\text{CD}_3\text{CN}$ , 298K)  $\delta$  = 9.95 (s, 1H, NH), 9.08 (s, 1H,  $\text{CH}_{\text{trz}}$ ) 8.67 (d,  $^3J_{\text{HH}}$  = 6.3 Hz, 1H,  $\text{CH}_{\text{pyr}}$ ), 8.49 (d,  $^3J_{\text{HH}}$  = 8.0 Hz, 1H,  $\text{CH}_{\text{pyr}}$ ), 7.96 - 7.85 (m, 3H,  $\text{CH}_{\text{phenyl}}$  + 1  $\text{CH}_{\text{pyr}}$ ) 7.77 - 7.52 (m, 3H,  $\text{CH}_{\text{phe}}$ ), 4.30 (s, 3H,  $\text{NCH}_3$ ), 2.51 (s, 3H,  $\text{pyrCH}_3$ ) ppm.  $^{13}\text{C}\{^1\text{H}\}$  NMR (101 MHz,  $\text{CD}_2\text{Cl}_2$ , 298K)  $\delta$  = 159.41 (CO), 149.61 ( $\text{CH}_{\text{pyr}}$ ), 146.27 ( $\text{C}_{\text{pyr}}$ ) 145.66 ( $\text{CH}_{\text{pyr}}$ ), 142.22 ( $\text{C}_{\text{trz}}$ ), 139.73 ( $\text{C}_{\text{pyr-Me}}$ ), 137.44 ( $\text{C}_{\text{phe}}$ ), 131.00 ( $\text{CH}_{\text{phe}}$ ), 130.78 ( $\text{CH}_{\text{phe}}$ ), 127.30 ( $\text{CH}_{\text{trz}}$ ), 126.98 ( $\text{CH}_{\text{pyr}}$ ), 122.07 ( $\text{CH}_{\text{phe}}$ ), 46.65 ( $\text{NCH}_3$ ), 18.34 ( $\text{pyrCH}_3$ ) ppm. HR-MS (m/z): calculated for  $\text{C}_{16}\text{H}_{16}\text{N}_5\text{O}$   $[\text{M-I}]^+$  = 294.1350 ; found: 294.1347.

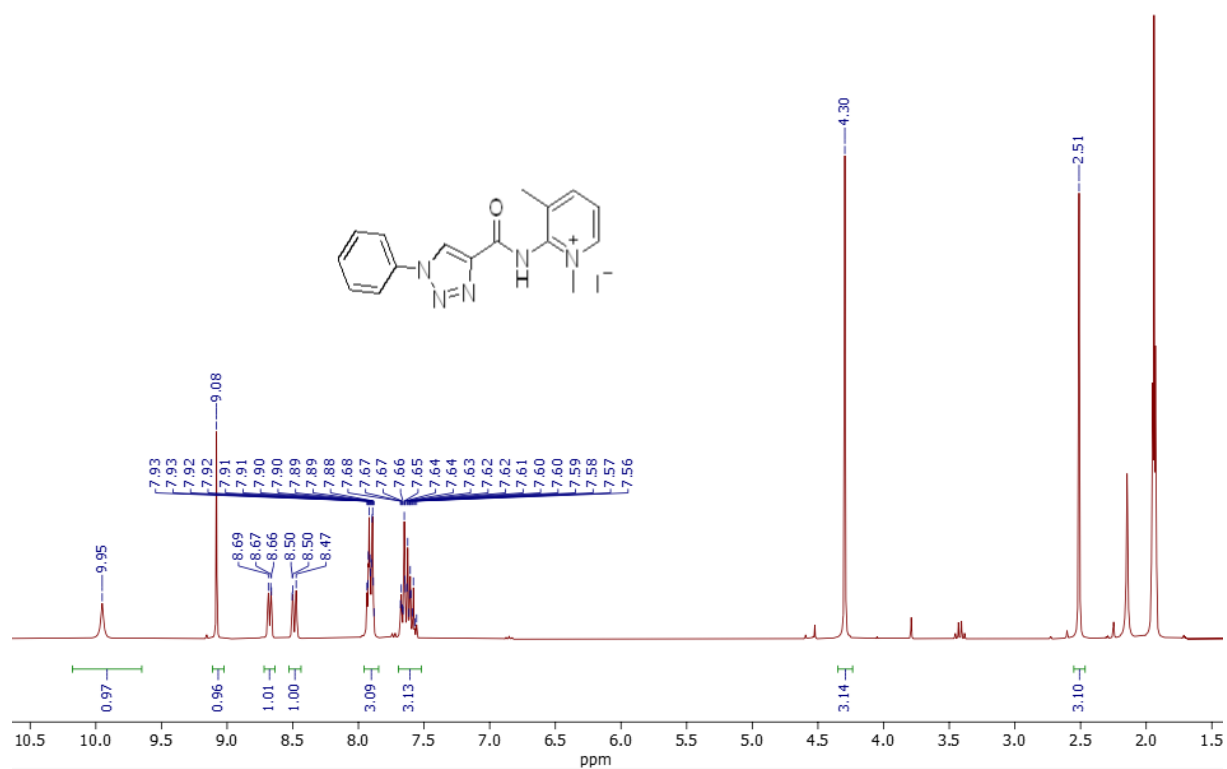

**Figure S27:**  $^1\text{H}$  NMR spectrum ( $\text{CD}_3\text{CN}$ , 298 K, 300 MHz) of **3c**

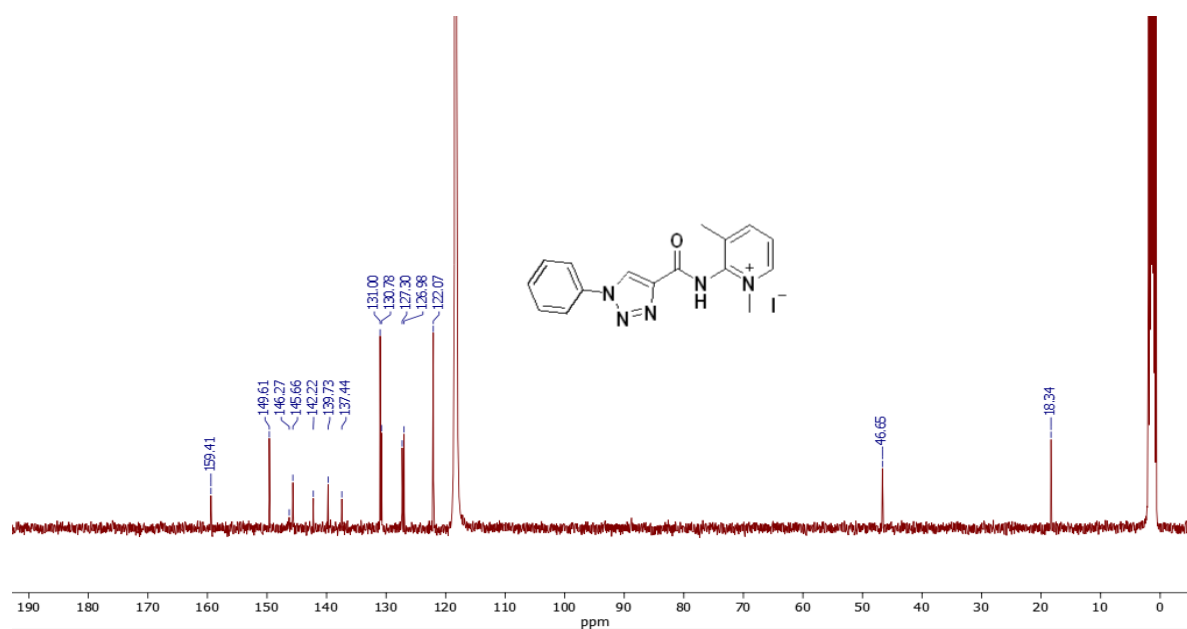

**Figure S28:**  $^{13}\text{C}\{^1\text{H}\}$  NMR spectrum ( $\text{CD}_3\text{CN}$ , 298 K, 101 MHz) of **3c**

### Synthesis of 3d

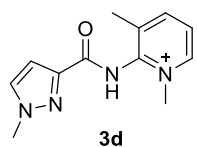

According to the general procedure II from **2d** (1.08 g, 5.0 mmol) at 60 °C for 16 h, salt **3d** was obtained as a yellow solid (1.25 g, 70%).  $^1\text{H}$  NMR (300 MHz,  $\text{CD}_3\text{CN}$ , 298K)  $\delta$  = 9.74 (s, 1H, NH), 8.78 (dd,  $J_{\text{HH}} = 6.2, 1.6$  Hz, 1H,  $\text{CH}_{\text{pyr}}$ ), 8.47 (dd,  $J_{\text{HH}} = 8.0, 1.6$  Hz, 1H,  $\text{CH}_{\text{pyr}}$ ), 7.89 (dd,  $^3J_{\text{HH}} = 8.0, 6.2$  Hz, 1H,  $\text{CH}_{\text{pyr}}$ ), 7.71 (d,  $^3J_{\text{HH}} = 2.4$  Hz, 1H,  $\text{CH}_{\text{prz}}$ ), 6.91 (d,  $^3J_{\text{HH}} = 2.4$  Hz, 1H,  $\text{CH}_{\text{prz}}$ ), 4.26 (s, 3H, pyr-NCH<sub>3</sub>), 3.97 (s, 3H, prz-NCH<sub>3</sub>), 2.44 (s, 3H, pyr-CH<sub>3</sub>) ppm.  $^{13}\text{C}$  { $^1\text{H}$ } NMR (75 MHz,  $\text{CD}_3\text{CN}$ , 298K)  $\delta$  = 160.98 (CO), 148.99 ( $\text{CH}_{\text{pyr}}$ ), 146.91 ( $\text{C}_{\text{pyr}}$ ), 145.13 ( $\text{CH}_{\text{pyr}}$ ), 144.34 ( $\text{C}_{\text{prz}}$ ), 139.43 ( $\text{C}_{\text{pyr-Me}}$ ), 134.21 ( $\text{CH}_{\text{prz}}$ ), 126.48 ( $\text{CH}_{\text{pyr}}$ ), 108.25 ( $\text{CH}_{\text{prz}}$ ), 46.51 (pyr-NCH<sub>3</sub>), 40.20 (prz-NCH<sub>3</sub>), 18.25 (pyr-CH<sub>3</sub>) ppm. HR-MS (m/z): calculated for  $\text{C}_{12}\text{H}_{15}\text{N}_4\text{O}$  [ $\text{M-I}$ ]<sup>+</sup> = 231.1241 ; found: 231.1240.

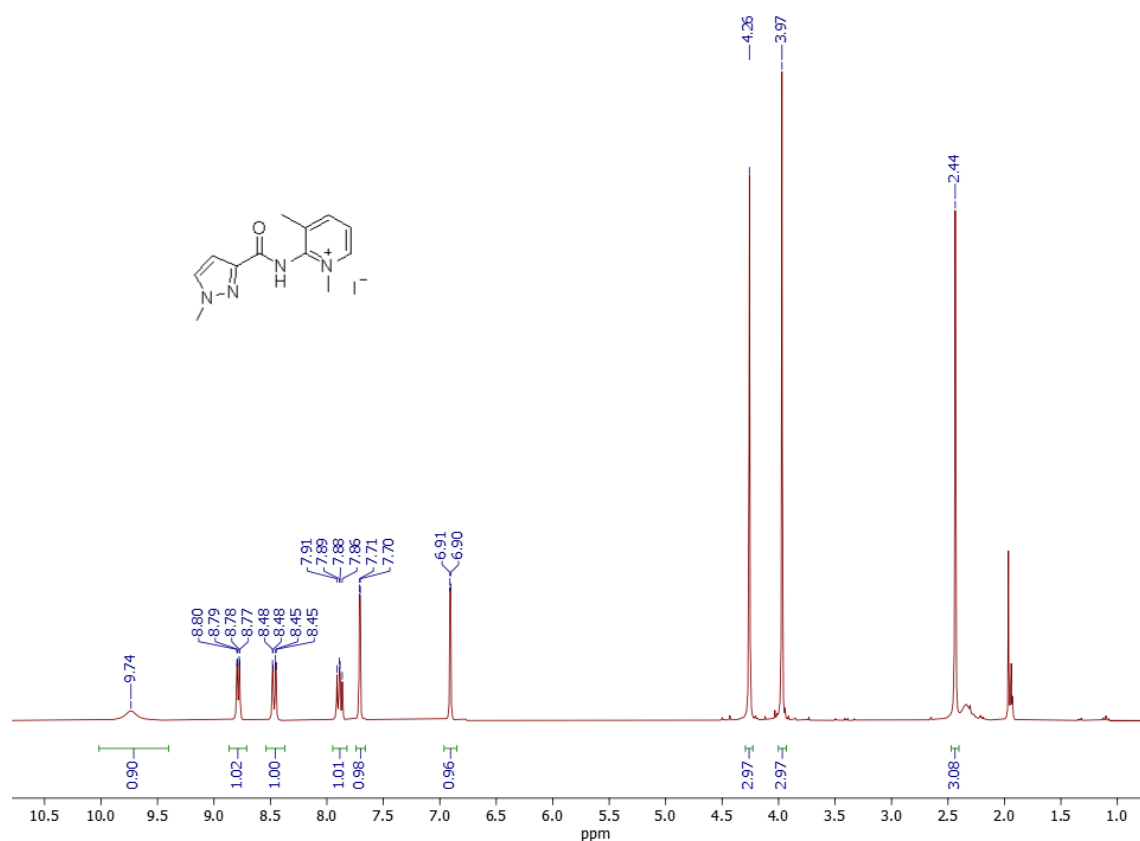

Figure S29:  $^1\text{H}$  NMR spectrum ( $\text{CD}_3\text{CN}$ , 298 K, 300 MHz) of **3d**

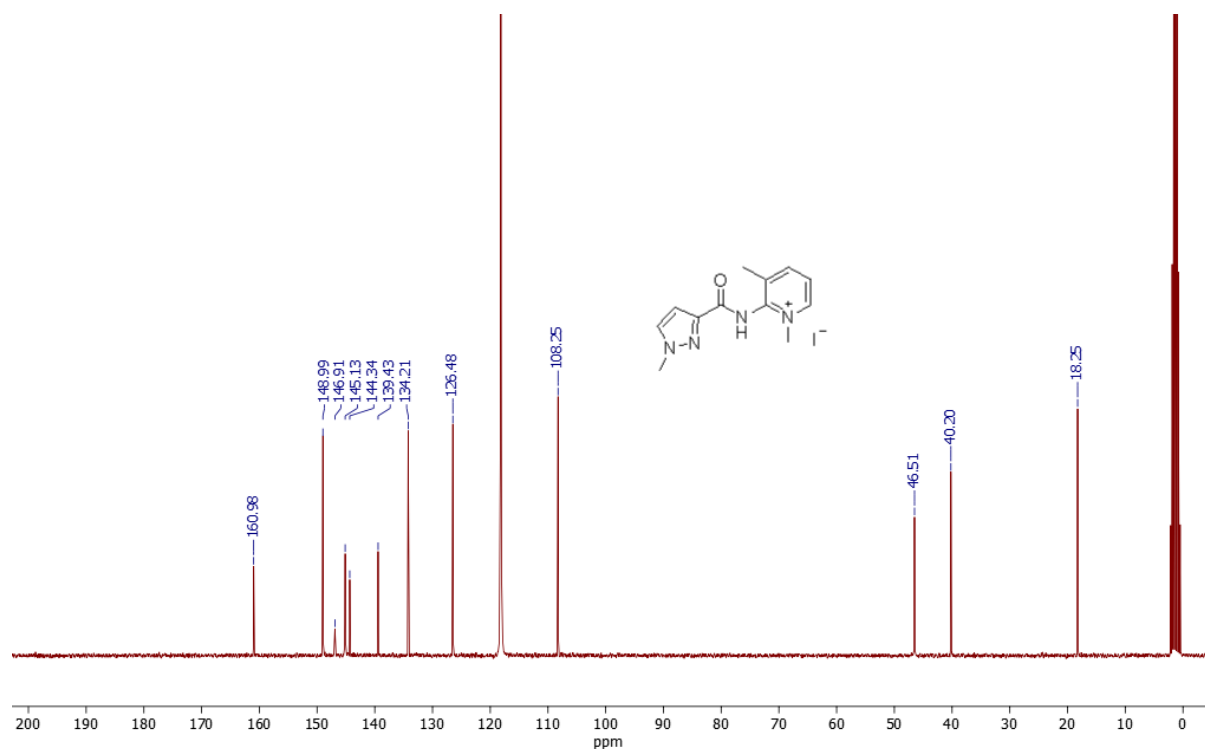

**Figure S30:**  $^{13}\text{C}\{^1\text{H}\}$  NMR spectrum ( $\text{CD}_3\text{CN}$ , 298 K, 75 MHz) of **3d**

### Synthesis of **3e**

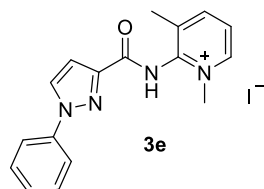

According to the general procedure II from **2e** (1.11 g, 4.0 mmol) and MeI (275  $\mu\text{L}$ , 4.4 mmol) at 60  $^\circ\text{C}$  for 16 h, salt **3e** was obtained as a pale yellow solid (1.29 g, 77%).  $^1\text{H}$  NMR (400 MHz,  $\text{CD}_3\text{CN}$ , 298K)  $\delta$  = 9.93 (s, 1H, NH), 8.66 (d,  $^3J_{\text{HH}}$  = 6.2 Hz, 1H,  $\text{CH}_{\text{pyr}}$ ), 8.46 (d,  $^3J_{\text{HH}}$  = 8.0 Hz, 1H,  $\text{CH}_{\text{pyr}}$ ), 8.34 (d,  $^3J_{\text{HH}}$  = 2.6 Hz, 1H,  $\text{CH}_{\text{prz}}$ ), 7.97 (d,  $^3J_{\text{HH}}$  = 8.1 Hz, 2H,  $\text{CH}_{\text{phe}}$ ), 7.88 (dd,  $^3J_{\text{HH}}$  = 8.0, 6.2 Hz, 1H,  $\text{CH}_{\text{pyr}}$ ), 7.58 (t,  $^3J_{\text{HH}}$  = 8.1 Hz, 2H,  $\text{CH}_{\text{phe}}$ ), 7.45 (t,  $^3J_{\text{HH}}$  = 8.1 Hz, 1H,  $\text{CH}_{\text{phe}}$ ), 7.11 (d,  $^3J_{\text{HH}}$  = 2.6 Hz, 1H,  $\text{CH}_{\text{prz}}$ ), 4.28 (s, 3H,  $\text{NCH}_3$ ), 2.50 (s, 3H,  $\text{pyr-CH}_3$ ) ppm.  $^{13}\text{C}\{^1\text{H}\}$  NMR (101 MHz,  $\text{CD}_3\text{CN}$ , 298K)  $\delta$  = 161.02 (CO), 149.40 ( $\text{CH}_{\text{pyr}}$ ), 146.85 ( $\text{C}_{\text{pyr}}$ ), 146.22 ( $\text{C}_{\text{prz}}$ ), 145.43 ( $\text{CH}_{\text{pyr}}$ ), 140.33 ( $\text{C}_{\text{phe}}$ ), 139.59 ( $\text{C}_{\text{pyr-Me}}$ ), 131.27 ( $\text{CH}_{\text{prz}}$ ), 130.73 ( $\text{CH}_{\text{phe}}$ ), 128.86 ( $\text{CH}_{\text{phe}}$ ), 126.69 ( $\text{CH}_{\text{pyr}}$ ), 120.50 ( $\text{CH}_{\text{phe}}$ ), 109.85 ( $\text{CH}_{\text{prz}}$ ), 46.62 ( $\text{pyr-NCH}_3$ ), 18.35 ( $\text{pyr-CH}_3$ ) ppm. HR-MS ( $m/z$ ): calculated for  $\text{C}_{17}\text{H}_{17}\text{N}_4\text{O}$   $[\text{M-I}]^+$  = 293.1397 ; found: 293.1395

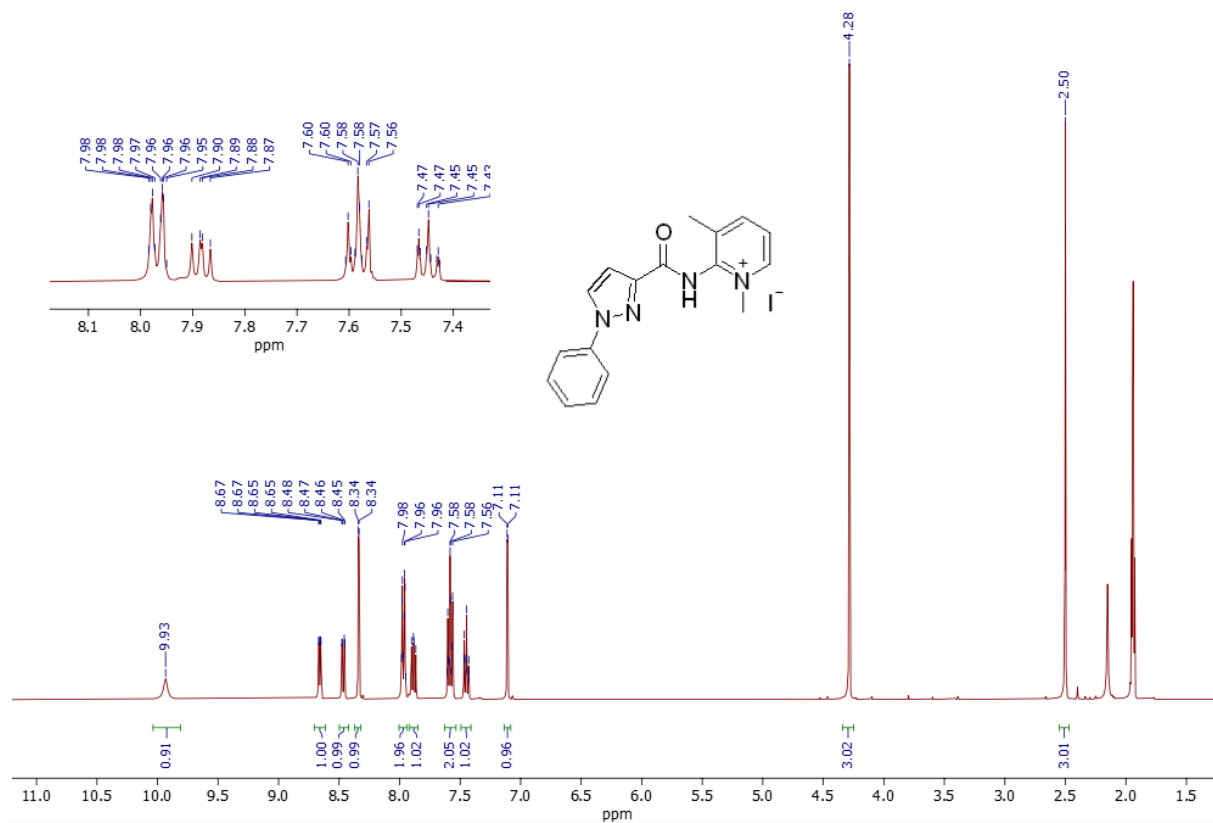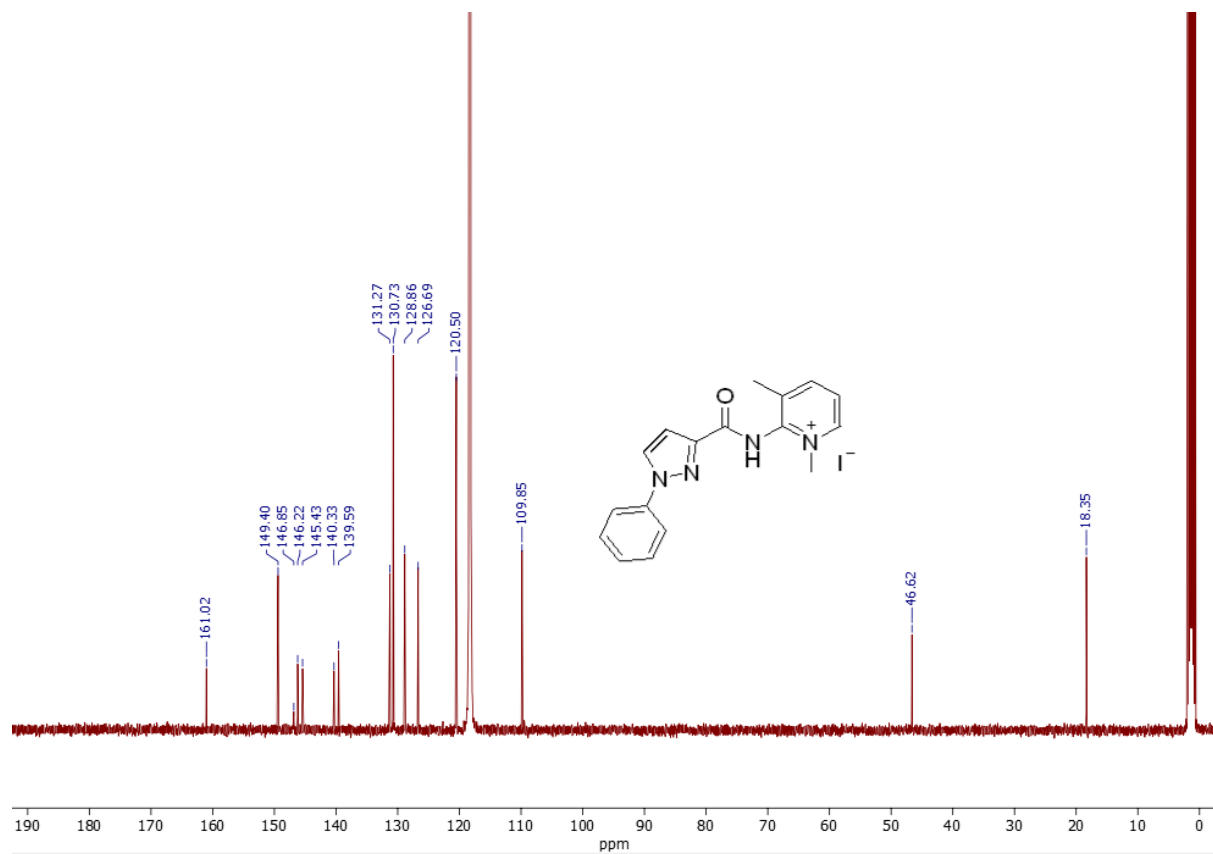

### Synthesis of **3f**

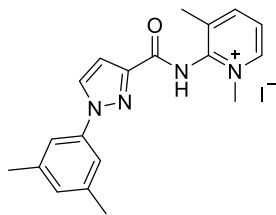

According to the general procedure II from **2f** (1.68 g, 5.5 mmol) and MeI (380  $\mu$ L, 6.1 mmol) at 60  $^{\circ}$ C for 16 h, salt **3f** was obtained as an off-white solid (1.87 g, 76%).  $^1\text{H}$  NMR (300 MHz,  $\text{CD}_3\text{CN}$ , 298K)  $\delta$  = 10.07 (s, 1H, NH), 8.68 (d,  $^3J_{\text{HH}}$  = 6.2 Hz, 1H,  $\text{CH}_{\text{pyr}}$ ), 8.46 (d,  $^3J_{\text{HH}}$  = 8.0 Hz, 1H,  $\text{CH}_{\text{pyr}}$ ), 8.29 (d,  $^3J_{\text{HH}}$  = 2.6 Hz, 1H,  $\text{CH}_{\text{prz}}$ ), 7.88 (dd,  $^3J_{\text{HH}}$  = 8.0, 6.2 Hz, 1H,  $\text{CH}_{\text{pyr}}$ ), 7.64 (s, 2H,  $\text{CH}_{\text{phe}}$ ), 7.08 (s, 1H,  $\text{CH}_{\text{phe}}$ ), 7.08 (d,  $^3J_{\text{HH}}$  = 2.6 Hz, 1H,  $\text{CH}_{\text{prz}}$ ), 4.30 (s, 3H,  $\text{NCH}_3$ ), 2.50 (s, 3H,  $\text{pyr-CH}_3$ ), 2.40 (s, 6H,  $\text{phe-CH}_3$ ) ppm.  $^{13}\text{C}\{^1\text{H}\}$  NMR (75 MHz,  $\text{CD}_3\text{CN}$ , 298K)  $\delta$  = 161.04 (CO), 149.28 ( $\text{CH}_{\text{pyr}}$ ), 146.94 ( $\text{C}_{\text{pyr}}$ ), 145.34 ( $\text{CH}_{\text{pyr}}$ ), 145.84 ( $\text{C}_{\text{prz}}$ ), 140.72 ( $\text{C}_{\text{phe-Me}}$ ), 140.16 ( $\text{C}_{\text{phe}}$ ), 139.66 ( $\text{C}_{\text{pyr-Me}}$ ), 130.99 ( $\text{CH}_{\text{prz}}$ ), 130.18 ( $\text{CH}_{\text{phe}}$ ), 126.65 ( $\text{CH}_{\text{pyr}}$ ), 118.08 ( $\text{CH}_{\text{phe}}$ ), 109.61 ( $\text{CH}_{\text{prz}}$ ), 46.72 ( $\text{pyr-NCH}_3$ ), 21.37 ( $\text{phe-CH}_3$ ), 18.41 ( $\text{pyr-CH}_3$ ) ppm. HR-MS ( $m/z$ ): calculated for  $\text{C}_{19}\text{H}_{21}\text{N}_4\text{O}$   $[\text{M-I}]^+$  = 321.1710 ; found: 321.1702.

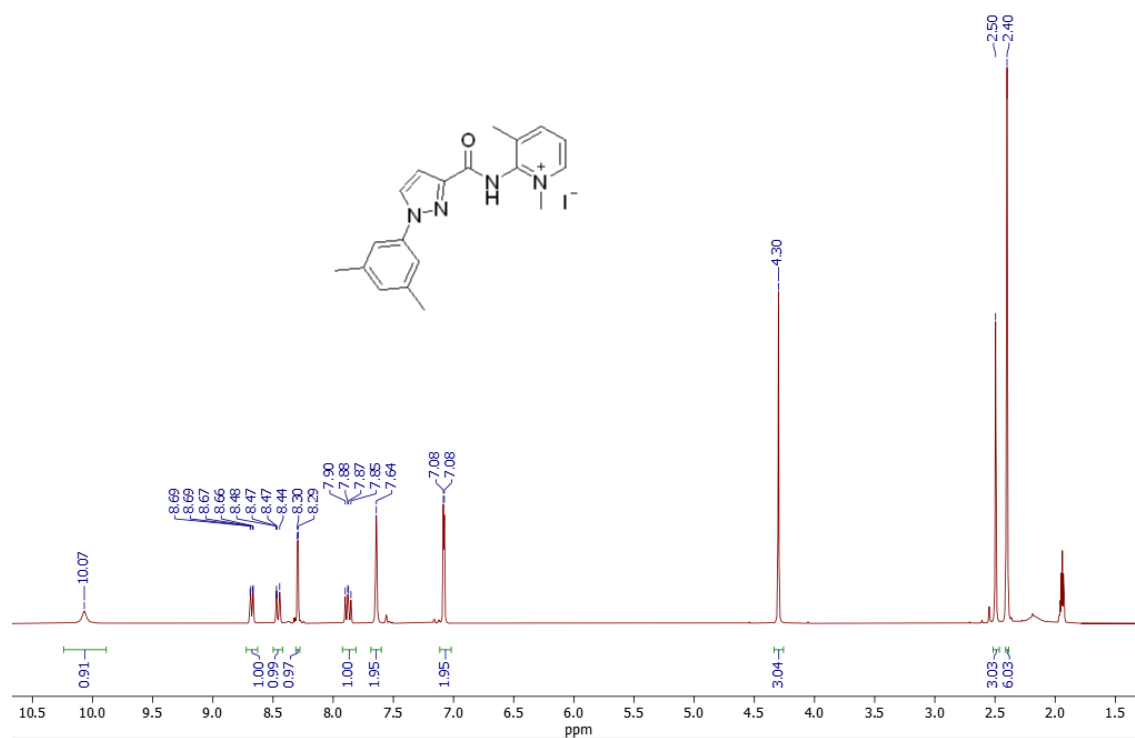

**Figure S33:**  $^1\text{H}$  NMR spectrum ( $\text{CD}_3\text{CN}$ , 298 K, 300 MHz) of **3f**

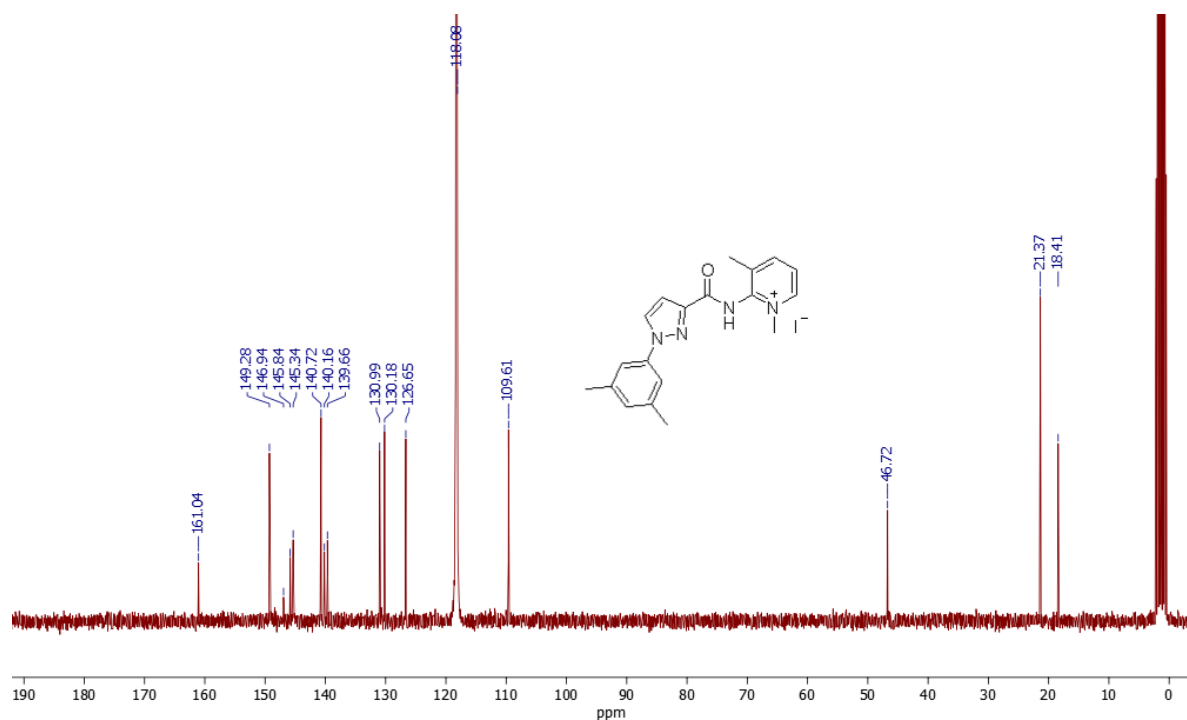

**Figure S34:**  $^{13}\text{C}\{^1\text{H}\}$  NMR spectrum ( $\text{CD}_3\text{CN}$ , 298 K, 75 MHz) of **3f**

### Synthesis of **3g**

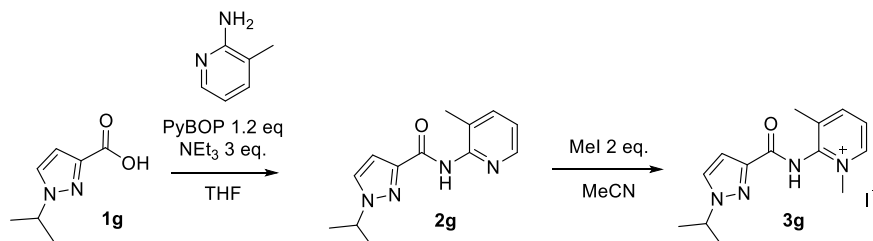

**Scheme S3:** Synthesis of iodide salt **3g**.

The carboxylic acid **1g** (838 mg, 5.4 mmol), 2-amino-3-methylpyridine (660  $\mu\text{L}$ , 6.54 mmol) and PyBOP (3.40 g, 6.5 mmol) were dissolved in dry THF (20 mL) in a  $\text{N}_2$  atmosphere.  $\text{NEt}_3$  (2.3 mL, 16 mmol) was added, and the reaction mixture was heated to 60  $^\circ\text{C}$  for 30 h.  $\text{H}_2\text{O}$  (40 mL) was added and the mixture was extracted with EtOAc (3 x 20 mL). The combined organic layers were washed with brine (20 mL), dried over  $\text{MgSO}_4$ , filtered, and concentrated under vacuo. The brownish residue was purified by gradient FCC ( $\text{SiO}_2$ ; 0 to 100% EtOAc in pentane; 2<sup>nd</sup> fraction) and was directly used for the next step without any further purification. The crude carboxamide **2g** was thus dissolved in dry MeCN (10 mL) and MeI (0.66 mL, 10.8 mmol) was added. The mixture was stirred at 60  $^\circ\text{C}$  for 8 h and then concentrated to 2 mL. Upon addition of  $\text{Et}_2\text{O}$  (8 mL), a yellowish precipitate formed, which was filtered off, washed with cold  $\text{Et}_2\text{O}$  and thoroughly dried under vacuum to yield **3g** as a yellow powder (1.17 g, 56%).  $^1\text{H}$  NMR (400 MHz,  $\text{CD}_2\text{Cl}_2$ )  $\delta$  = 8.73 (d,  $^3J_{\text{HH}} = 5.5$  Hz, 1H,  $\text{CH}_{\text{PYA}}$ ), 8.33 (d,  $^3J_{\text{HH}} = 7.9$  Hz, 1H,

$CH_{PYA}$ ), 7.85 – 7.81 (m, 1H,  $CH_{PYA}$ ), 7.58 (d,  $^3J_{HH} = 2.4$  Hz, 1H,  $CH_{prz}$ ), 7.02 (d,  $^3J_{HH} = 2.4$  Hz, 1H,  $CH_{prz}$ ), 4.62 (sept, 1H,  $N_{prz}-CH$ ), 4.45 (s, 3H,  $N_{PYA}-CH_3$ ), 2.57 (s, 3H,  $C-CH_3$ ), 1.59 (s, 3H,  $N_{prz}-C-CH_3$ ), 1.57 (s, 3H,  $N_{prz}-C-CH_3$ ) ppm.  $^{13}C\{^1H\}$  NMR (101 MHz,  $CD_2Cl_2$ , 298K)  $\delta = 160.77$  (CO), 147.99 ( $C_{prz}$ ), 147.73 ( $C_{PYA}$ ), 143.59 ( $CH_{PYA}$ ), 143.34 ( $CH_{PYA}$ ), 140.17 ( $C_{PYA}-Me$ ), 129.54 ( $CH_{prz}$ ), 125.72 ( $CH_{PYA}$ ), 107.79 ( $CH_{prz}$ ), 55.59 ( $N_{prz}CH$ ), 47.30 ( $N_{PYA}CH_3$ ), 23.05 ( $N_{prz}-C-CH_3$ ), 18.99 ( $C-CH_3$ ) ppm. HR-MS (m/z) calculated for  $C_{14}H_{19}N_4O$   $[M-I]^+ = 259.1553$ ; found: 259.1556. Elemental Analysis calculated for  $C_{14}H_{19}N_4O$ : C 43.54, H 4.96, N 14.51 found: C 43.86, H 5.0, N 14.17.

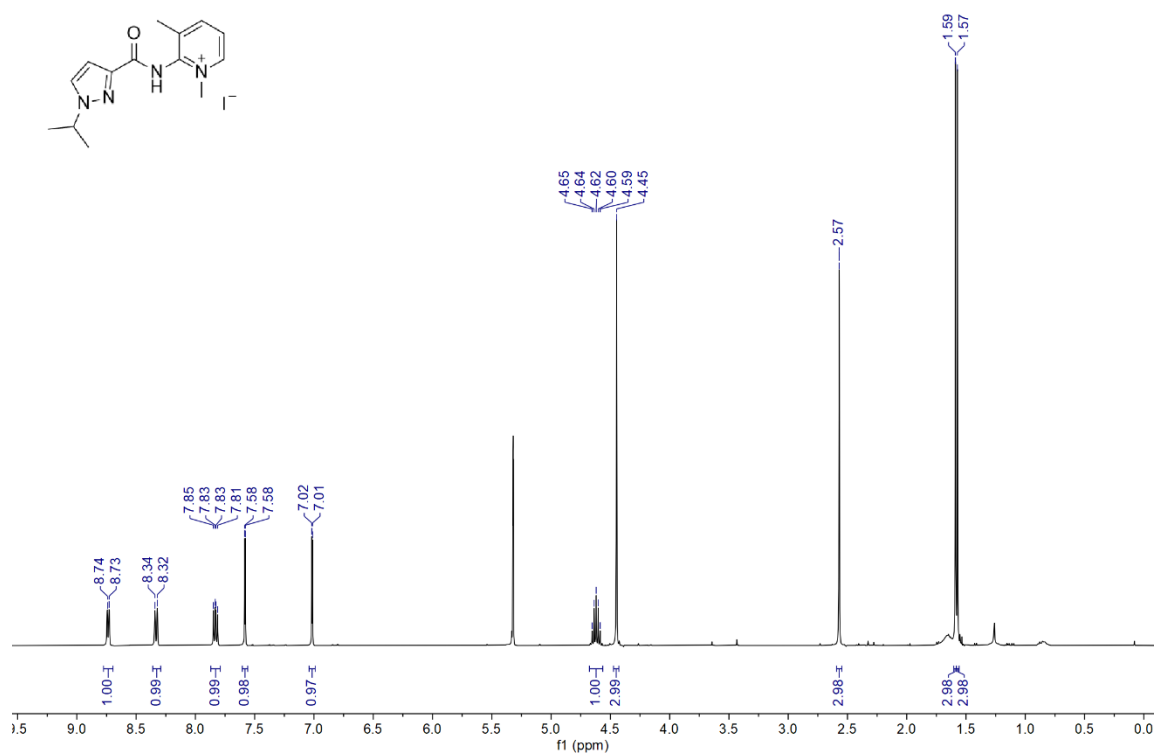

Figure S35:  $^1H$  NMR spectrum ( $CD_2Cl_2$ , 298 K, 400 MHz) of **3g**

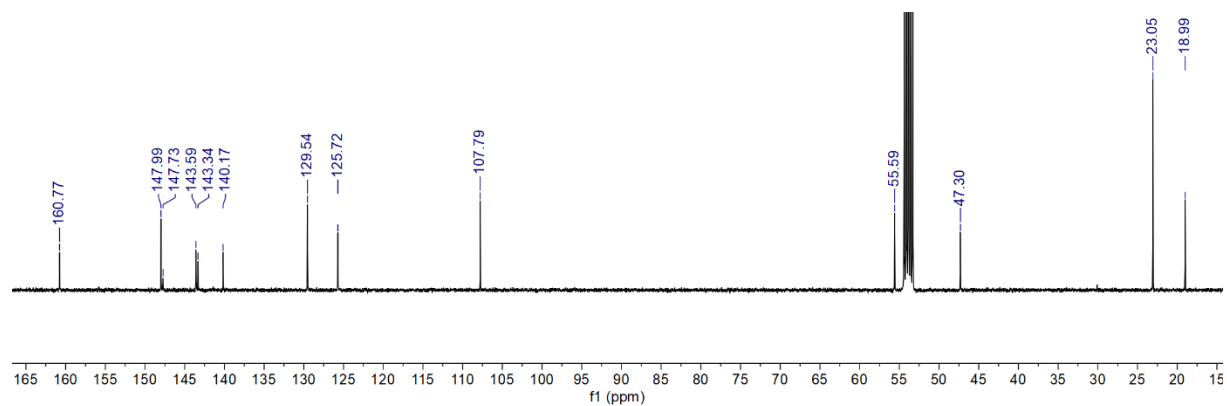

Figure S36:  $^{13}C\{^1H\}$  NMR spectrum ( $CD_2Cl_2$ , 298 K, 101 MHz) of **3g**



### S.1.6 Synthesis of pyridinium amidate (PYA) 4a–4g

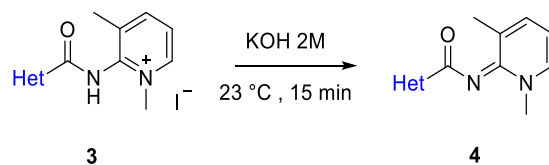

**Scheme S4:** General method for the preparation of neutral PYA **4a–g**.

**General procedure III:** The pyridinium salt **3** (2 mmol) was dissolved in KOH<sub>aq</sub> (2 M, 10 mL, 20 mmol) and the resulting solution was briefly sonicated and stirred at 23 °C for 10 min. The resulting slurry was extracted with CH<sub>2</sub>Cl<sub>2</sub> (5 x 15 mL), the combined organic fractions were dried over MgSO<sub>4</sub>, filtered, and evaporated to dryness to yield the pure pyridinium amidate (PYA) **4**.

#### Synthesis of PYA **4a**

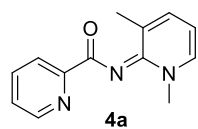

Following the general procedure III, reaction of **3a** (312 mg, 880 μmol) with KOH yielded compound **4a** as a yellow solid (176 mg, 88%). Spectroscopic data are in agreement with literature values.<sup>S1</sup> <sup>1</sup>H NMR (300 MHz, CD<sub>2</sub>Cl<sub>2</sub>, 298 K): δ = 8.61 (d, <sup>3</sup>J<sub>HH</sub> = 4.6 Hz, 1H, CH<sub>pyr</sub>), 8.18 (d, <sup>3</sup>J<sub>HH</sub> = 7.4 Hz, 1H, CH<sub>pyr</sub>), 7.76 (t, <sup>3</sup>J<sub>HH</sub> = 7.4 Hz, 1H, CH<sub>pyr</sub>), 7.66 (d, <sup>3</sup>J<sub>HH</sub> = 6.6 Hz, 1H, CH<sub>PYA</sub>), 7.57 (d, <sup>3</sup>J<sub>HH</sub> = 7.2 Hz, 1H, CH<sub>PYA</sub>), 7.31 (dd, <sup>3</sup>J<sub>HH</sub> = 7.4, 4.6 Hz, 1H, CH<sub>pyr</sub>), 6.73 (dd, <sup>3</sup>J<sub>HH</sub> = 7.2, 6.7 Hz, 1H, CH<sub>PYA</sub>), 3.86 (s, 3H, PYA-NCH<sub>3</sub>), 2.20 (s, 3H, PYA-CCH<sub>3</sub>) ppm.

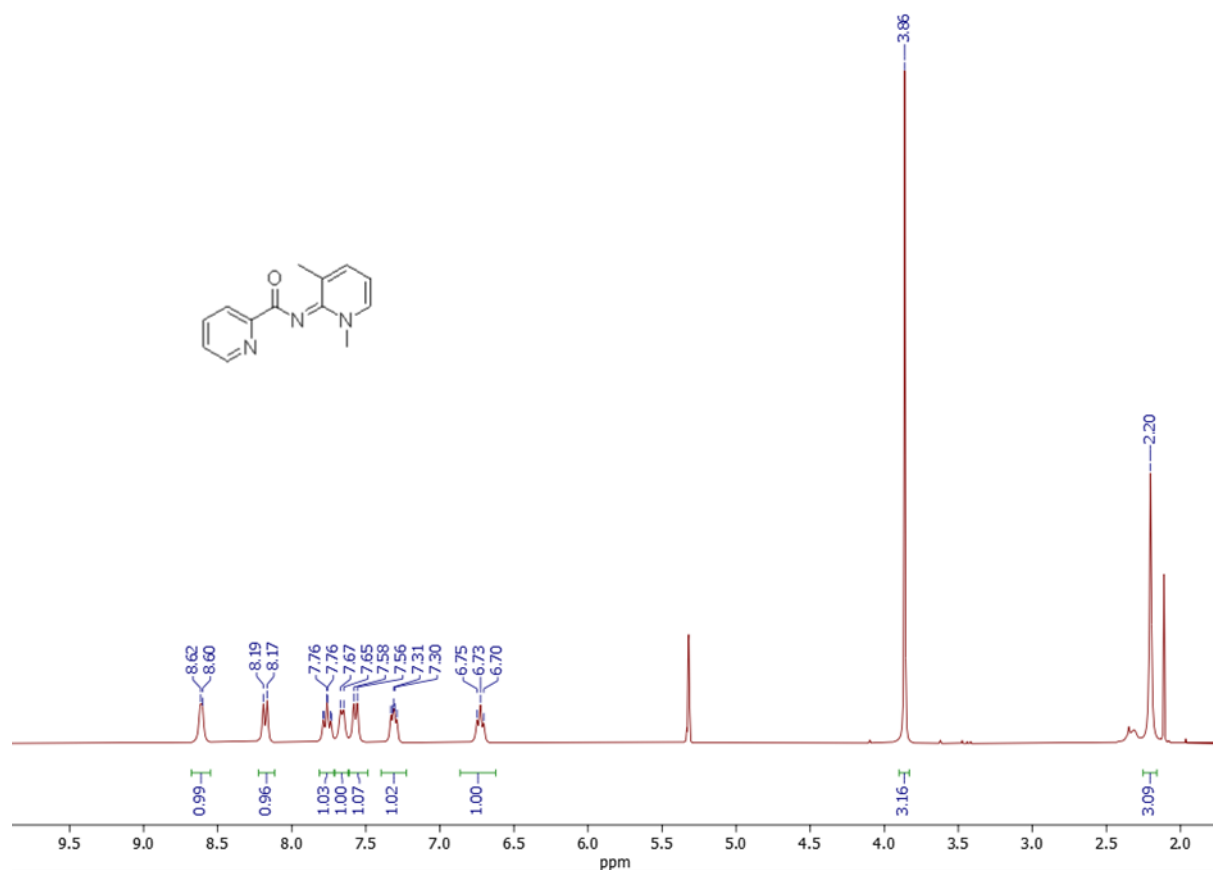

Figure S37:  $^1\text{H}$  NMR spectrum ( $\text{CD}_2\text{Cl}_2$ , 298 K, 300 MHz) of **4a**

#### Synthesis of PYA **4b**

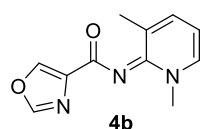

Following the general procedure III and starting from **3b** (690 mg, 2.0 mmol) yielded compound **4b** as a pale-yellow solid (343 mg, 79%).  $^1\text{H}$  NMR (300 MHz,  $\text{CD}_2\text{Cl}_2$ , 298K)  $\delta$  = 8.15 (d,  $^4J_{\text{HH}} = 1.1$  Hz, 1H,  $\text{CH}_{\text{Oxa}}$ ), 7.85 (d,  $^4J_{\text{HH}} = 1.1$  Hz, 1H,  $\text{CH}_{\text{Oxa}}$ ), 7.64 (d,  $^3J_{\text{HH}} = 6.6$  Hz, 1H,  $\text{CH}_{\text{PYA}}$ ), 7.58 (d,  $^3J_{\text{HH}} = 7.2$  Hz, 1H,  $\text{CH}_{\text{PYA}}$ ), 6.74 (dd,  $^3J_{\text{HH}} = 7.2$  Hz, 6.6 Hz, 1H,  $\text{CH}_{\text{PYA}}$ ), 3.85 (s, 3H,  $\text{NCH}_3$ ), 2.22 (s, 3H,  $\text{pyrCH}_3$ ) ppm.  $^{13}\text{C}\{^1\text{H}\}$  NMR (75 MHz,  $\text{CD}_2\text{Cl}_2$ , 298K)  $\delta$  = 162.04 (CO), 160.70 ( $\text{C}_{\text{PYA}}$ ), 151.04 ( $\text{CH}_{\text{Oxa}}$ ), 141.79 ( $\text{CH}_{\text{Oxa}}$ ), 141.10 ( $\text{C}_{\text{Oxa}}$ ), 140.98 ( $\text{CH}_{\text{PYA}}$ ), 137.98 ( $\text{CH}_{\text{PYA}}$ ), 132.91 ( $\text{C}_{\text{pyr-Me}}$ ), 113.72 ( $\text{CH}_{\text{PYA}}$ ), 43.10 ( $\text{NCH}_3$ ), 19.63 ( $\text{pyrCH}_3$ ) ppm. HR-MS (m/z): calculated for  $\text{C}_{11}\text{H}_{12}\text{N}_3\text{O}_2$   $[\text{M}+\text{H}]^+$  = 218.0925 ; found: 218.0914.

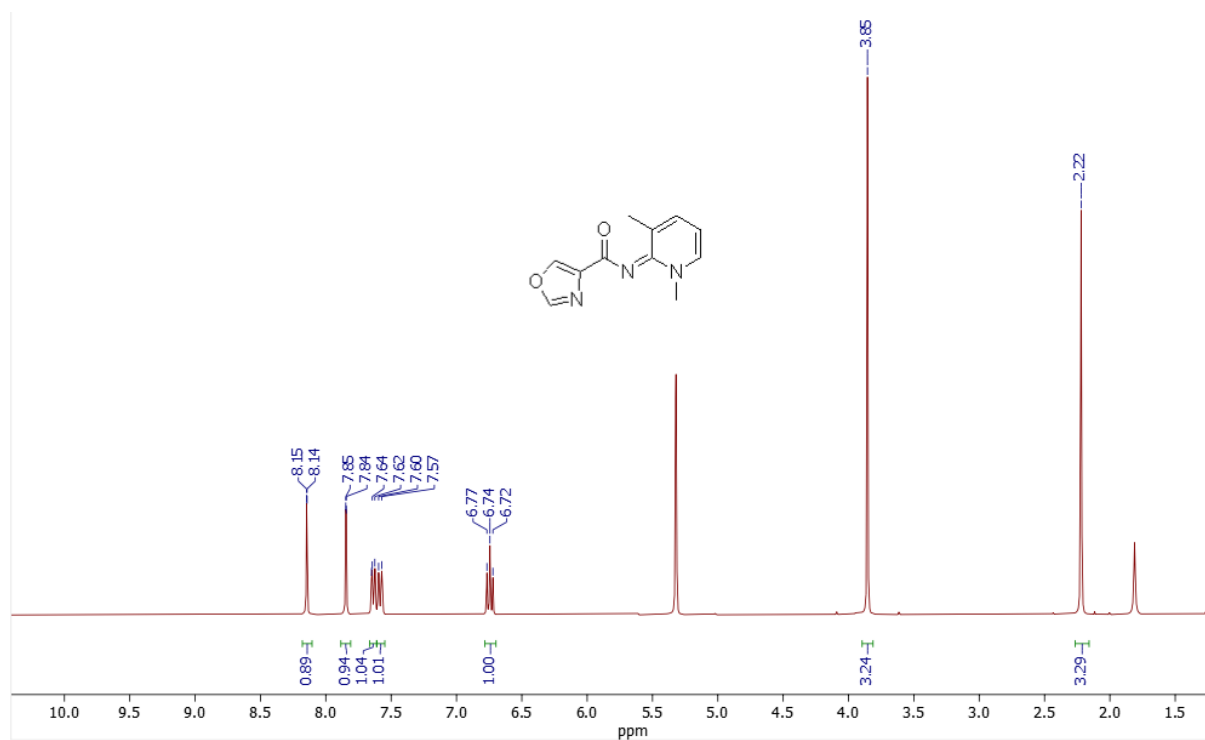

Figure S38:  $^1\text{H}$  NMR spectrum ( $\text{CD}_2\text{Cl}_2$ , 298 K, 300 MHz) of **4b**

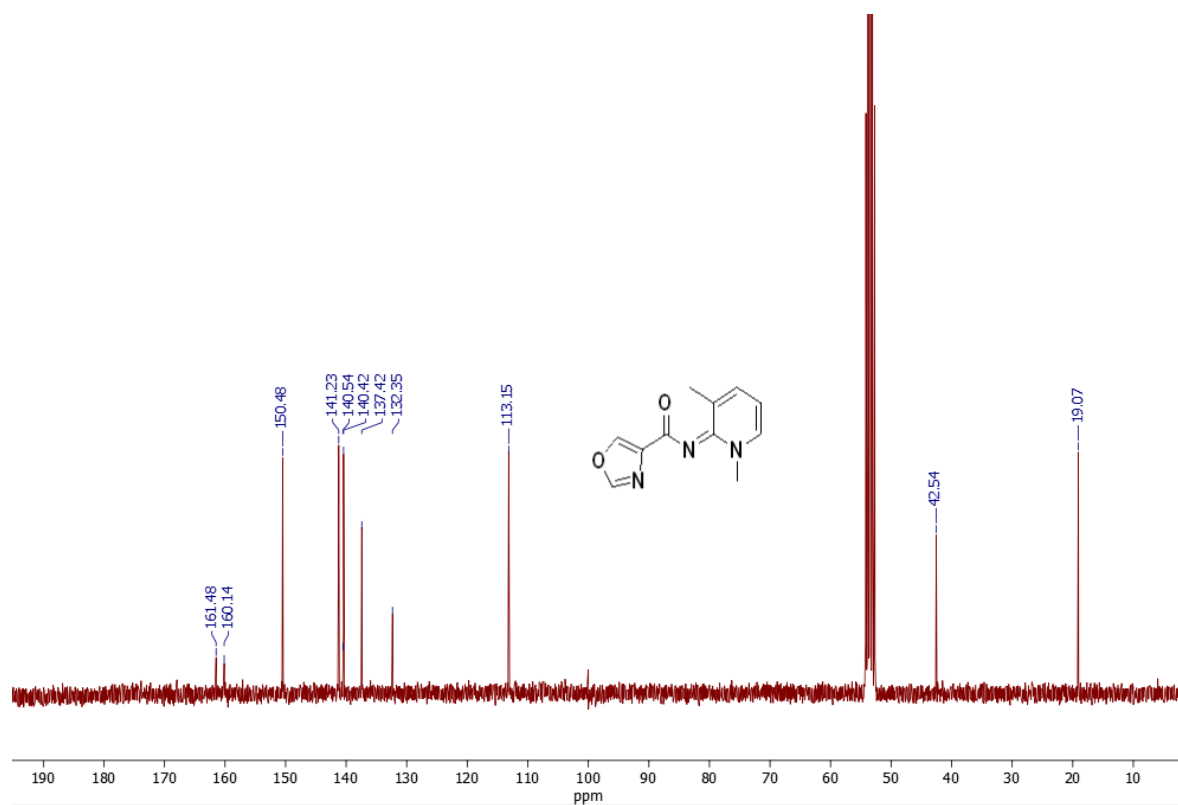

Figure S39:  $^{13}\text{C}\{^1\text{H}\}$  NMR spectrum ( $\text{CD}_2\text{Cl}_2$ , 298 K, 75 MHz) of **4b**

### Synthesis of PYA 4c

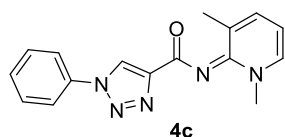

Following the general procedure III and starting from **3c** (420 mg, 1.0 mmol) yielded compound **4c** as a yellow solid (276 mg, 94%).  $^1\text{H}$  NMR (300 MHz,  $\text{CD}_2\text{Cl}_2$ , 298K)  $\delta$  = 8.47 (s, 1H,  $\text{CH}_{\text{trz}}$ ), 7.86 - 7.75 (m, 2H,  $\text{CH}_{\text{phe}}$ ), 7.67 (d,  $^3J_{\text{HH}}$  = 6.7 Hz, 1H,  $\text{CH}_{\text{PYA}}$ ), 7.62 (d,  $^3J_{\text{HH}}$  = 7.2 Hz, 1H,  $\text{CH}_{\text{PYA}}$ ), 7.59 - 7.52 (m, 2H,  $\text{CH}_{\text{phe}}$ ), 7.50 - 7.43 (m, 1H,  $\text{CH}_{\text{phe}}$ ), 6.79 (dd,  $^3J_{\text{HH}}$  = 7.2 Hz, 6.7 Hz, 1H,  $\text{CH}_{\text{PYA}}$ ), 3.92 (s, 3H,  $\text{NCH}_3$ ), 2.27 (s, 3H,  $\text{pyrCH}_3$ ) ppm.  $^{13}\text{C}\{^1\text{H}\}$  NMR (75 MHz,  $\text{CD}_2\text{Cl}_2$ , 298K)  $\delta$  = 161.25 (CO), 160.71 ( $\text{C}_{\text{PYA}}$ ), 149.10 ( $\text{C}_{\text{trz}}$ ), 140.98 ( $\text{CH}_{\text{PYA}}$ ), 137.91 ( $\text{CH}_{\text{PYA}}$ ), 137.56 ( $\text{C}_{\text{phe}}$ ), 132.85 ( $\text{C}_{\text{pyr-Me}}$ ), 130.14 ( $\text{CH}_{\text{phe}}$ ), 129.05 ( $\text{CH}_{\text{phe}}$ ), 124.05 ( $\text{CH}_{\text{trz}}$ ), 120.85 ( $\text{CH}_{\text{phe}}$ ), 113.82 ( $\text{CH}_{\text{PYA}}$ ), 43.05 ( $\text{NCH}_3$ ), 19.47 ( $\text{pyrCH}_3$ ) ppm. HR-MS (m/z): calculated for  $\text{C}_{16}\text{H}_{16}\text{N}_5\text{O}$  [ $\text{M}+\text{H}$ ] $^+$  = 294.1355 ; found: 294.1336.

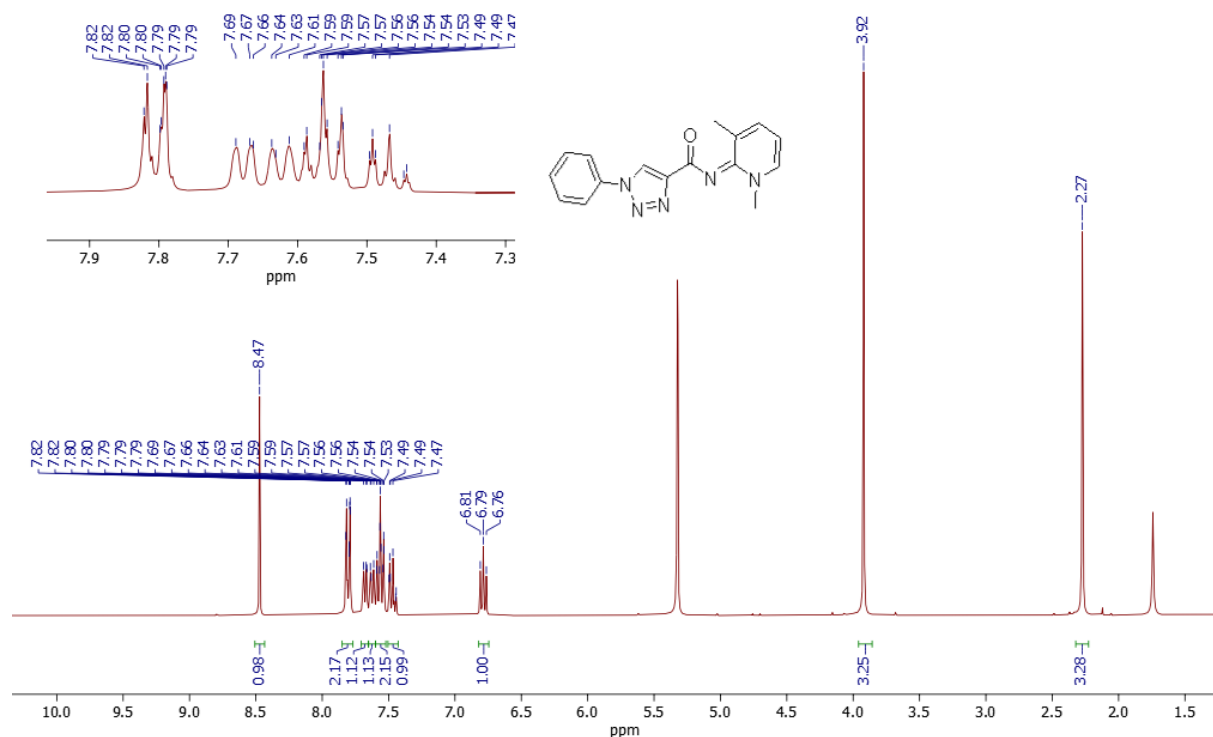

**Figure S40:**  $^1\text{H}$  NMR spectrum ( $\text{CD}_2\text{Cl}_2$ , 298 K, 300 MHz) of **4c**

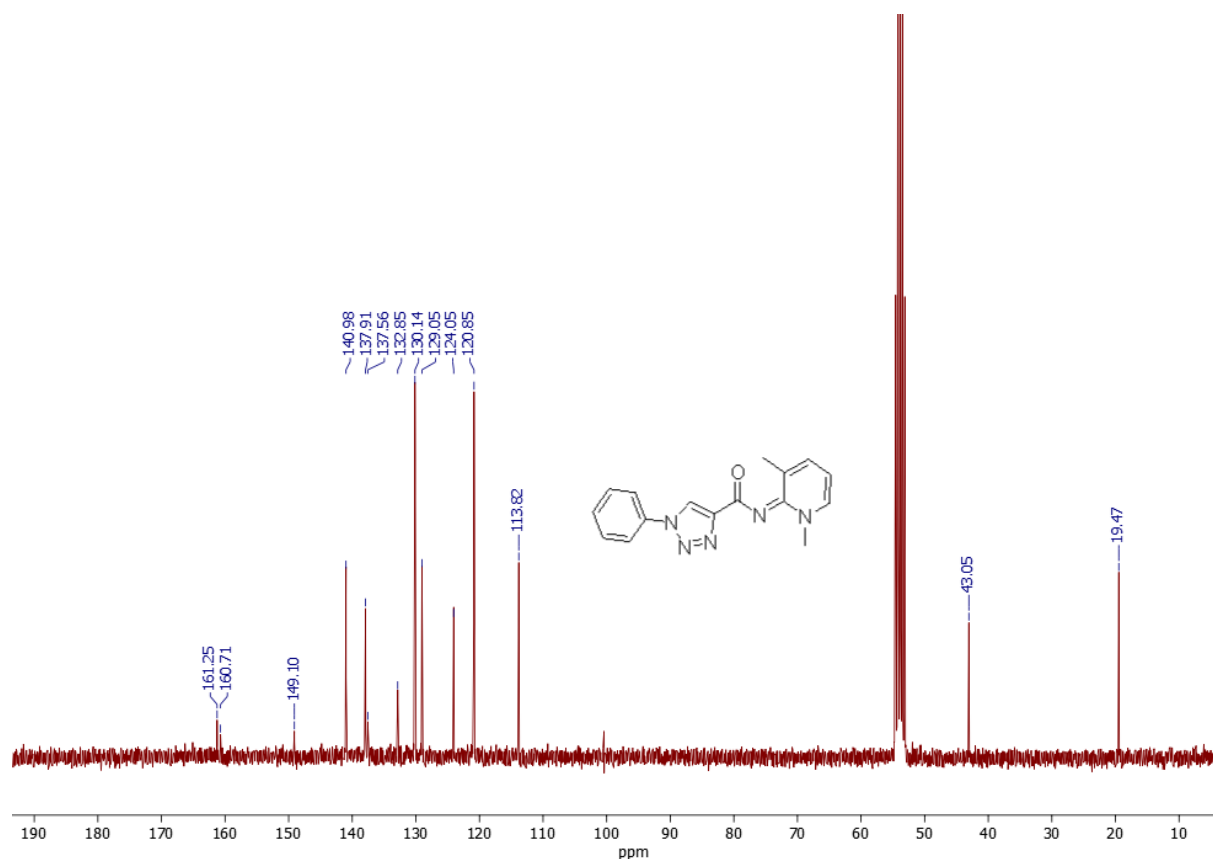

**Figure S41:**  $^{13}\text{C}\{^1\text{H}\}$  NMR spectrum ( $\text{CD}_2\text{Cl}_2$ , 298 K, 75 MHz) of **4c**

### Synthesis of PYA **4d**

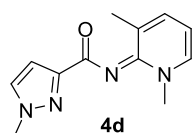

Following the general procedure III and starting from **3d** (500 mg, 1.4 mmol) yielded compound **4d** as a pale-yellow solid (285 mg, 88%).  $^1\text{H}$  NMR (400 MHz,  $\text{CD}_2\text{Cl}_2$ , 298K)  $\delta$  = 7.59 (d,  $^3J_{\text{HH}}$  = 6.7 Hz, 1H,  $\text{CH}_{\text{PYA}}$ ), 7.52 (d,  $^3J_{\text{HH}}$  = 7.2 Hz, 1H,  $\text{CH}_{\text{PYA}}$ ), 7.35 (d,  $^3J_{\text{HH}}$  = 2.2 Hz, 1H,  $\text{CH}_{\text{prz}}$ ), 6.69 (d,  $^3J_{\text{HH}}$  = 2.2 Hz, 1H,  $\text{CH}_{\text{prz}}$ ), 6.66 (dd,  $^3J_{\text{HH}}$  = 7.2, 6.7 Hz, 2H,  $\text{CH}_{\text{PYA}}$ ), 3.90 (s, 3H,  $\text{prz-NCH}_3$ ), 3.82 (s, 3H,  $\text{pyr-NCH}_3$ ), 2.19 (s, 3H,  $\text{pyr-CH}_3$ ) ppm.  $^{13}\text{C}\{^1\text{H}\}$  NMR (101 MHz,  $\text{CD}_2\text{Cl}_2$ , 298K)  $\delta$  = 163.90 (CO), 160.20 ( $\text{C}_{\text{PYA}}$ ), 151.79 ( $\text{C}_{\text{prz}}$ ), 140.25 ( $\text{CH}_{\text{PYA}}$ ), 137.69 ( $\text{CH}_{\text{PYA}}$ ), 132.46 ( $\text{C}_{\text{pyr-Me}}$ ), 130.67 ( $\text{CH}_{\text{prz}}$ ), 112.65 ( $\text{CH}_{\text{PYA}}$ ), 107.75 ( $\text{CH}_{\text{prz}}$ ), 42.77 ( $\text{pyr-NCH}_3$ ), 39.48 ( $\text{prz-NCH}_3$ ), 19.60 ( $\text{pyr-CH}_3$ ) ppm. HR-MS (m/z): calculated for  $\text{C}_{12}\text{H}_{15}\text{N}_4\text{O}$  [ $\text{M}+\text{H}$ ] $^+$  = 231.1246 ; found: 231.1238.

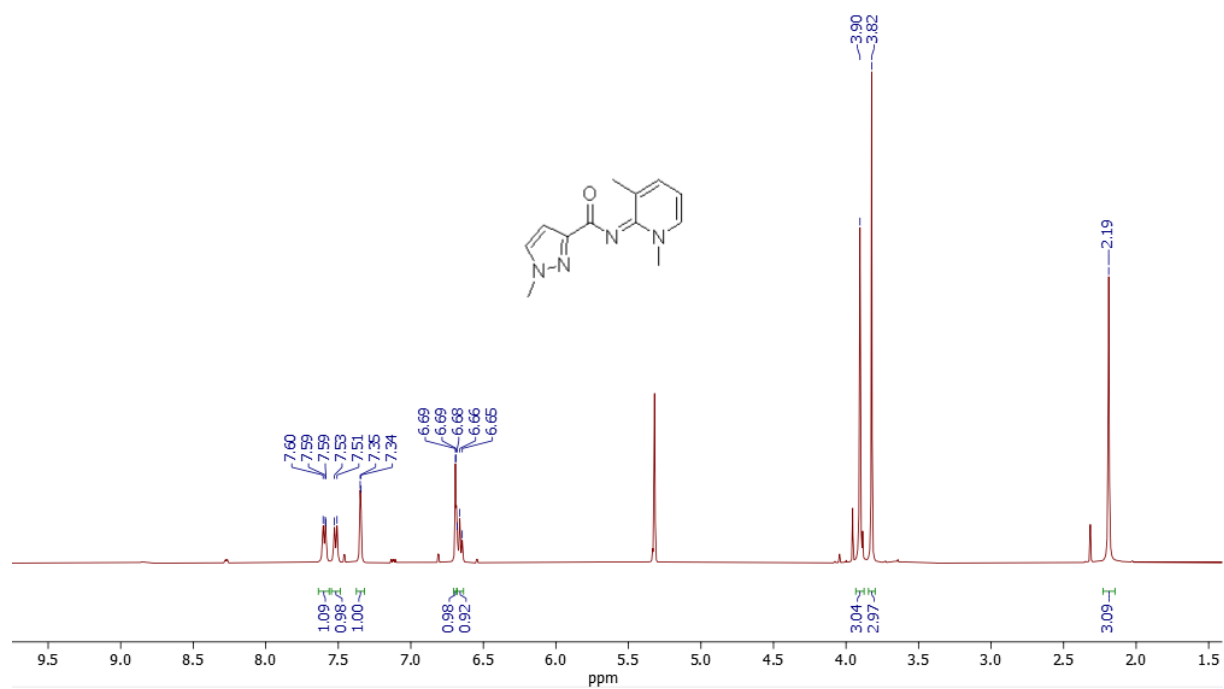

Figure S42:  $^1\text{H}$  NMR spectrum ( $\text{CD}_2\text{Cl}_2$ , 298 K, 400 MHz) of **4d**

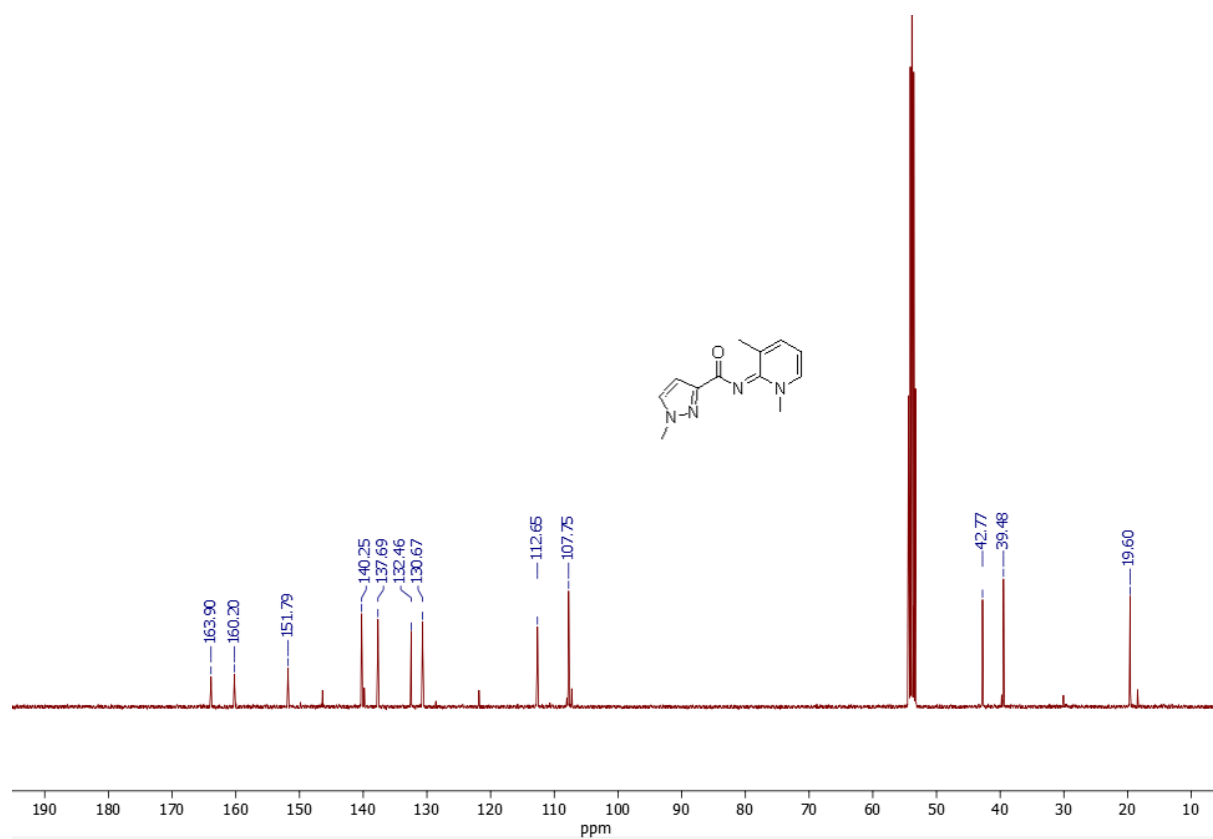

Figure S43:  $^{13}\text{C}\{^1\text{H}\}$  NMR spectrum ( $\text{CD}_2\text{Cl}_2$ , 298 K, 101 MHz) of **4d**

### Synthesis of PYA 4e

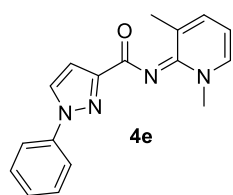

Following the general procedure III and starting from **3e** (800 mg, 1.9 mmol) yielded compound **4e** as a white solid (556 mg, 98%).  $^1\text{H}$  NMR (300 MHz,  $\text{CD}_2\text{Cl}_2$ , 298K)  $\delta$  = 7.95 (d,  $^3J_{\text{HH}}$  = 2.5 Hz, 1H,  $\text{CH}_{\text{prz}}$ ), 7.75 (d,  $^3J_{\text{HH}}$  = 7.7 Hz, 2H,  $\text{CH}_{\text{phe}}$ ), 7.63 (d,  $^3J_{\text{HH}}$  = 6.6 Hz, 1H,  $\text{CH}_{\text{PYA}}$ ), 7.57 (d,  $^3J_{\text{HH}}$  = 7.2 Hz, 1H,  $\text{CH}_{\text{PYA}}$ ), 7.46 (t,  $^3J_{\text{HH}}$  = 7.7 Hz, 2H,  $\text{CH}_{\text{phe}}$ ), 7.31 (d,  $^3J_{\text{HH}}$  = 7.7 Hz, 1H,  $\text{CH}_{\text{phe}}$ ), 6.93 (d,  $^3J_{\text{HH}}$  = 2.5 Hz, 1H,  $\text{CH}_{\text{prz}}$ ), 6.72 (dd,  $^3J_{\text{HH}}$  = 7.2 Hz, 6.6 Hz, 1H,  $\text{CH}_{\text{PYA}}$ ), 3.88 (s, 3H,  $\text{NCH}_3$ ), 2.25 (s, 3H,  $\text{pyr-CH}_3$ ) ppm.  $^{13}\text{C}\{^1\text{H}\}$  NMR (101 MHz,  $\text{CD}_2\text{Cl}_2$ , 298K)  $\delta$  = 163.23 (CO), 160.48 ( $\text{C}_{\text{PYA}}$ ), 153.60 ( $\text{C}_{\text{prz}}$ ), 140.71 ( $\text{C}_{\text{phe}}$ ), 140.53 ( $\text{CH}_{\text{PYA}}$ ), 137.79 ( $\text{CH}_{\text{PYA}}$ ), 132.70 ( $\text{C}_{\text{PYA-Me}}$ ), 129.73 ( $\text{CH}_{\text{phe}}$ ), 127.56 ( $\text{CH}_{\text{phe}}$ ), 126.82 ( $\text{CH}_{\text{prz}}$ ), 119.61 ( $\text{CH}_{\text{phe}}$ ), 113.15 ( $\text{CH}_{\text{PYA}}$ ), 109.72 ( $\text{CH}_{\text{prz}}$ ), 42.91 ( $\text{pyr-NCH}_3$ ), 19.59 ( $\text{pyr-CH}_3$ ) ppm. HR-MS (m/z): calculated for  $\text{C}_{17}\text{H}_{17}\text{N}_4\text{O}$   $[\text{M}+\text{H}]^+$  = 293.1402 ; found: 293.1394.

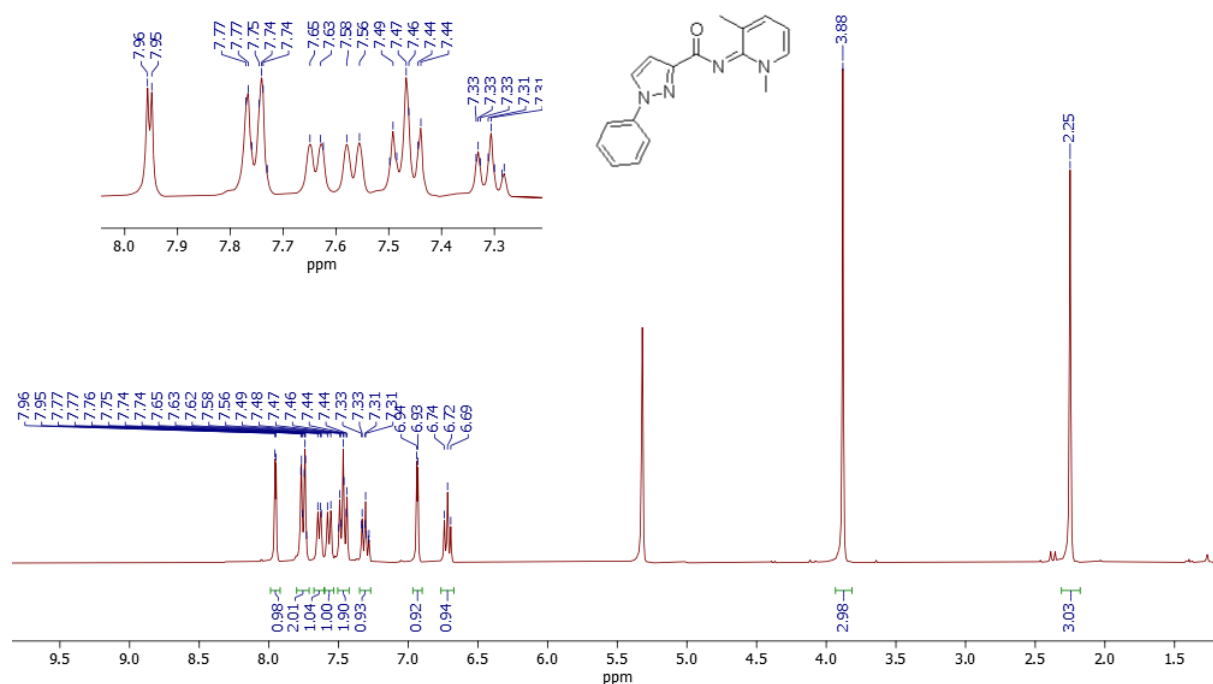

Figure S44:  $^1\text{H}$  NMR spectrum ( $\text{CD}_2\text{Cl}_2$ , 298 K, 300 MHz) of **4e**

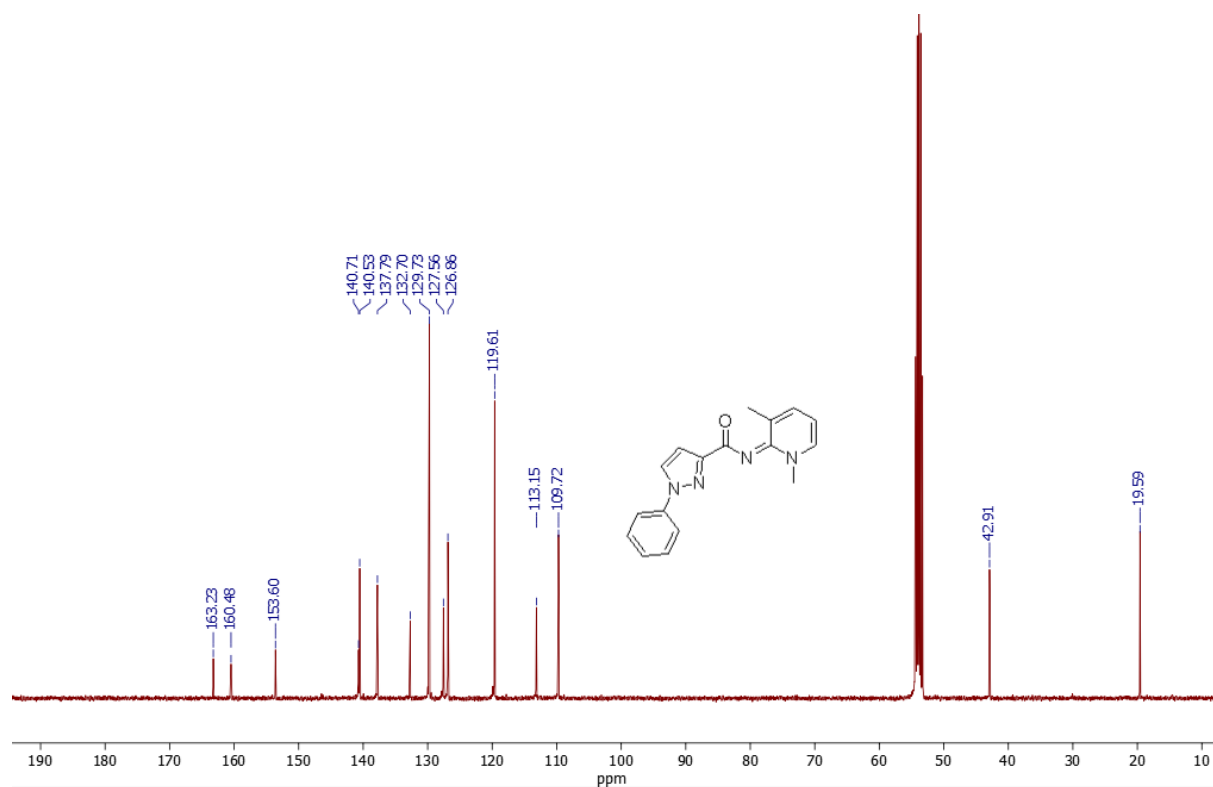

**Figure S45:**  $^{13}\text{C}\{^1\text{H}\}$  NMR spectrum ( $\text{CD}_2\text{Cl}_2$ , 298 K, 75 MHz) of **4e**

#### Synthesis of PYA **4f**

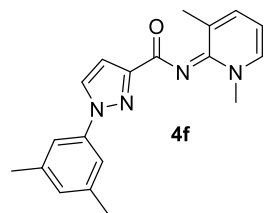

Following the general procedure III and starting from **3f** (1.0 g, 2.23 mmol) yielded compound **4f** as a white solid (618 mg, 86%).  $^1\text{H}$  NMR (300 MHz,  $\text{CD}_2\text{Cl}_2$ , 298K)  $\delta$  = 7.92 (d,  $^3J_{\text{HH}}$  = 2.5 Hz, 1H,  $\text{CH}_{\text{prz}}$ ), 7.63 (dd,  $J_{\text{HH}}$  = 6.6, 1.7 Hz, 1H,  $\text{CH}_{\text{PYA}}$ ), 7.57 (dd,  $J_{\text{HH}}$  = 7.3, 1.7 Hz, 1H,  $\text{CH}_{\text{PYA}}$ ), 6.96 (s, 1H,  $\text{CH}_{\text{phe}}$ ), 6.91 (d,  $^3J_{\text{HH}}$  = 2.5 Hz, 1H,  $\text{CH}_{\text{prz}}$ ), 6.71 (dd,  $^3J_{\text{HH}}$  = 7.3 Hz, 6.6 Hz, 1H,  $\text{CH}_{\text{PYA}}$ ), 3.88 (s, 3H,  $\text{NCH}_3$ ), 2.38 (s, 6H,  $\text{phe-CH}_3$ ), 2.25 (s, 3H,  $\text{pyr-CH}_3$ ) ppm.  $^{13}\text{C}\{^1\text{H}\}$  NMR (101 MHz,  $\text{CD}_2\text{Cl}_2$ , 298K)  $\delta$  = 163.41 (CO), 160.55 ( $\text{C}_{\text{PYA}}$ ), 153.37 ( $\text{C}_{\text{prz}}$ ), 140.61 ( $\text{C}_{\text{phe}}$ ), 140.43 ( $\text{CH}_{\text{PYA}}$ ), 139.73 ( $\text{C}_{\text{phe-Me}}$ ), 137.74 ( $\text{CH}_{\text{PYA}}$ ), 132.72 ( $\text{C}_{\text{PYA-Me}}$ ), 128.52 ( $\text{CH}_{\text{phe}}$ ), 127.50 ( $\text{CH}_{\text{prz}}$ ), 117.36 ( $\text{CH}_{\text{phe}}$ ), 112.98 ( $\text{CH}_{\text{PYA}}$ ), 109.50 ( $\text{CH}_{\text{prz}}$ ), 42.89 ( $\text{pyr-NCH}_3$ ), 21.47 ( $\text{phe-CH}_3$ ), 19.63 ( $\text{pyr-CH}_3$ ) ppm. HR-MS ( $m/z$ ): calculated for  $\text{C}_{19}\text{H}_{21}\text{N}_4\text{O}$   $[\text{M}+\text{H}]^+$  = 321.1715 ; found: 321.1703.



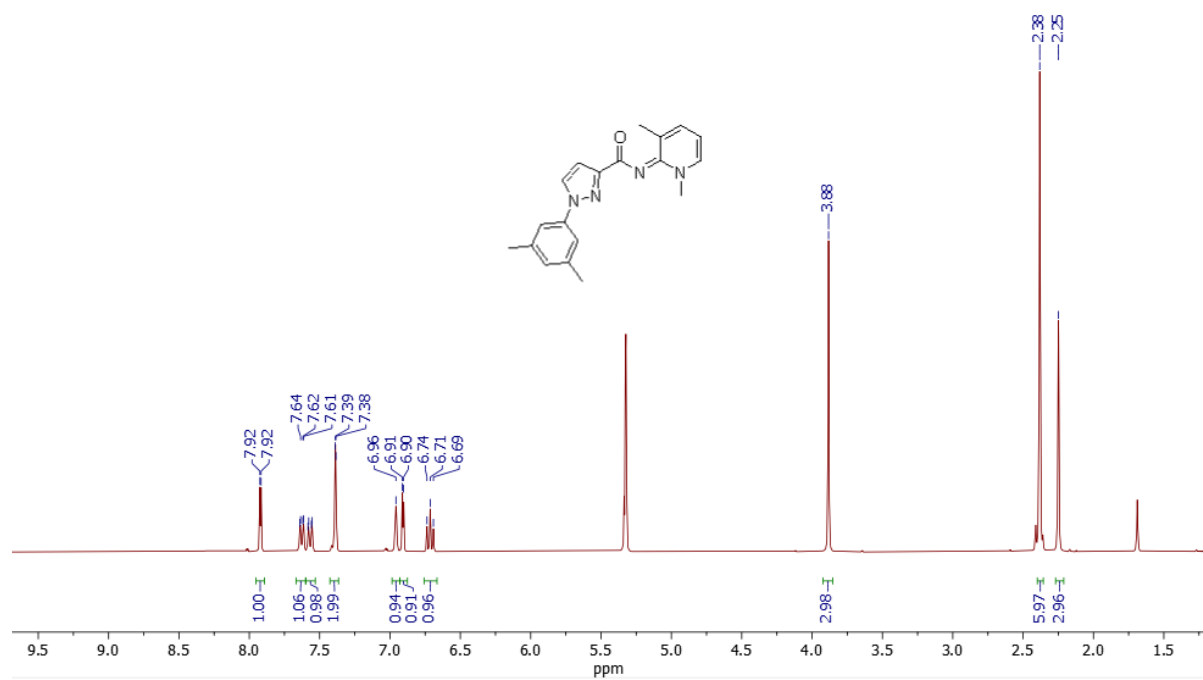

Figure S46:  $^1\text{H}$  NMR spectrum ( $\text{CD}_2\text{Cl}_2$ , 298 K, 300 MHz) of **4f**

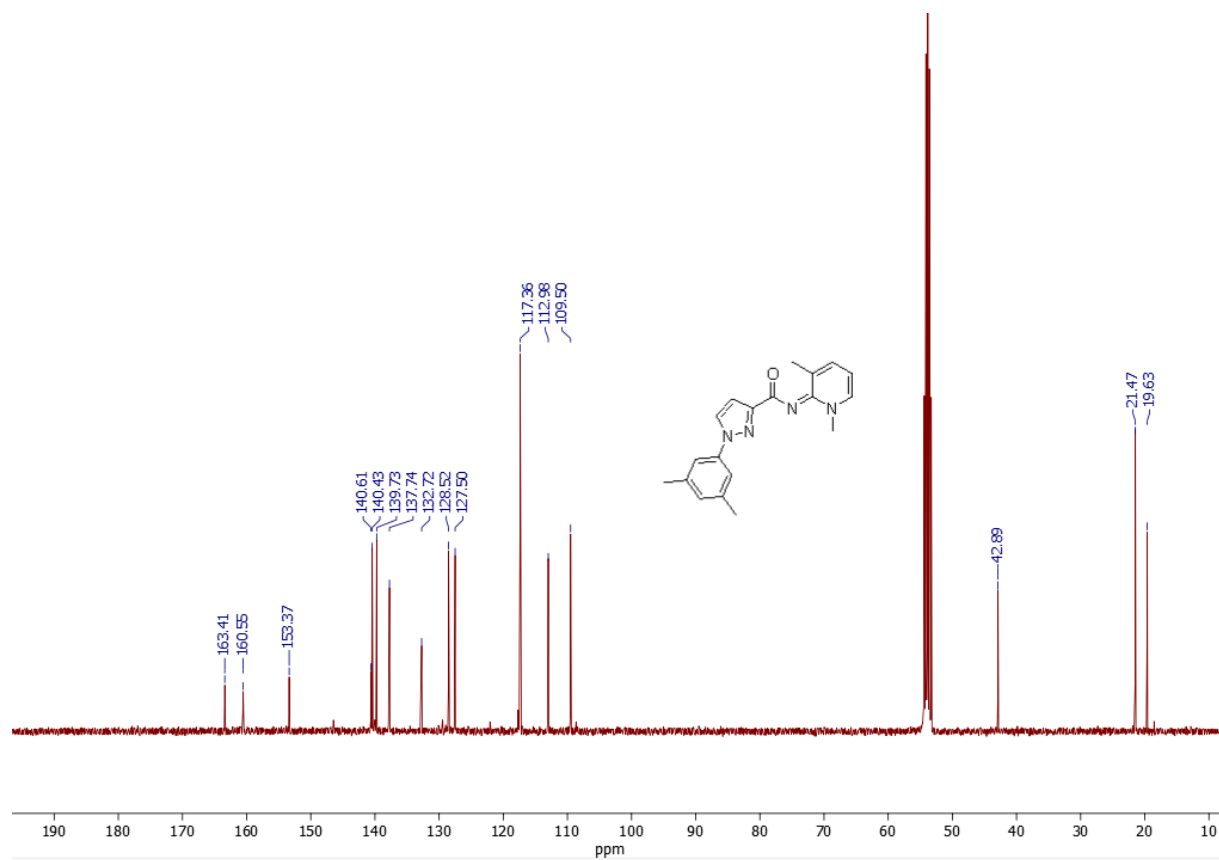

Figure S47:  $^{13}\text{C}\{^1\text{H}\}$  NMR spectrum ( $\text{CD}_2\text{Cl}_2$ , 298 K, 101 MHz) of **4f**

### Synthesis of PYA 4g

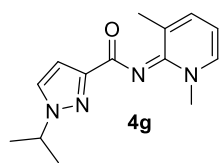

Following the general procedure III and starting from **3g** (800 mg, 2.07 mmol) yielded compound **4g** as a white solid (490 mg, 82%).  $^1\text{H NMR}$  (400 MHz,  $\text{CD}_2\text{Cl}_2$ )  $\delta$  = 7.59 (d,  $^3J_{\text{HH}}$  = 6.3 Hz, 1H,  $\text{CH}_{\text{PYA}}$ ), 7.52 (d,  $^3J_{\text{HH}}$  = 6.8 Hz, 1H,  $\text{CH}_{\text{PYA}}$ ), 7.41 (d,  $^3J_{\text{HH}}$  = 2.3 Hz, 1H,  $\text{CH}_{\text{prz}}$ ), 6.69 (d,  $^3J_{\text{HH}}$  = 2.3 Hz, 1H,  $\text{CH}_{\text{prz}}$ ), 6.68 – 6.64 (m, 1H,  $\text{CH}_{\text{PYA}}$ ), 4.53 (sept, 1H,  $\text{N}_{\text{prz}}\text{-CH}$ ), 3.83 (s, 3H,  $\text{N}_{\text{PYA}}\text{-CH}_3$ ), 2.2 (s, 3H,  $\text{C-CH}_3$ ), 1.51 (s, 3H,  $\text{N}_{\text{prz}}\text{-C-CH}_3$ ), 1.49 (s, 3H,  $\text{N}_{\text{prz}}\text{-C-CH}_3$ ) ppm.  $^{13}\text{C}\{^1\text{H}\}$  NMR (101 MHz,  $\text{CD}_2\text{Cl}_2$ , 298K)  $\delta$  = 164.07 (CO), 160.34 ( $\text{C}_{\text{prz}}$ ), 151.13 ( $\text{C}_{\text{PYA}}$ ), 140.21 ( $\text{CH}_{\text{PYA}}$ ), 137.66 ( $\text{CH}_{\text{PYA}}$ ), 132.56 ( $\text{C}_{\text{PYA}}\text{-Me}$ ), 126.95 ( $\text{CH}_{\text{prz}}$ ), 112.66 ( $\text{CH}_{\text{PYA}}$ ), 107.30 ( $\text{CH}_{\text{prz}}$ ), 54.51 ( $\text{N}_{\text{prz}}\text{CH}$ ), 42.79 ( $\text{N}_{\text{PYA}}\text{CH}_3$ ), 23.14 ( $\text{N}_{\text{prz}}\text{-C-CH}_3$ ), 19.6 ( $\text{C-CH}_3$ ) ppm. HR-MS ( $m/z$ ) calculated for  $\text{C}_{14}\text{H}_{19}\text{N}_4\text{O}$   $[\text{M}+\text{H}]^+$  = 259.1553; found: 259.1557.

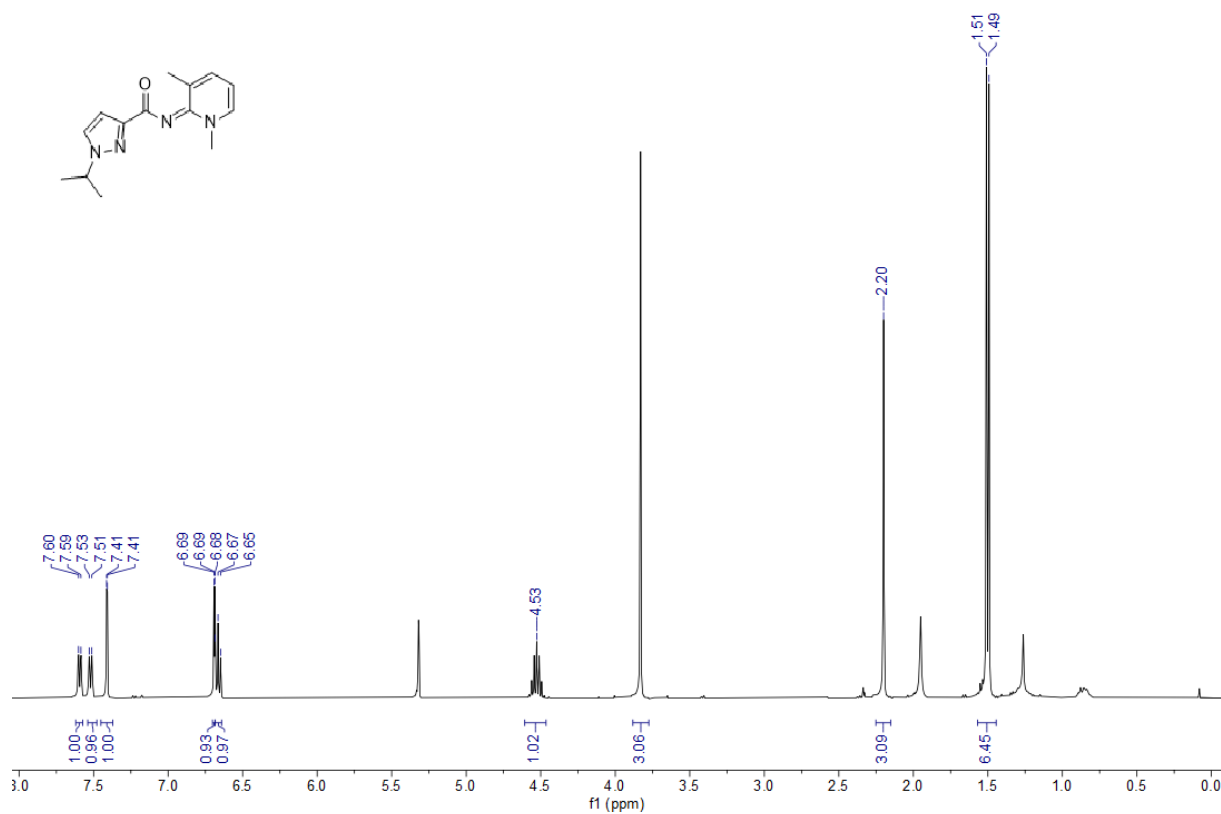

Figure S48:  $^1\text{H NMR}$  spectrum ( $\text{CD}_2\text{Cl}_2$ , 298 K, 400 MHz) of **4g**

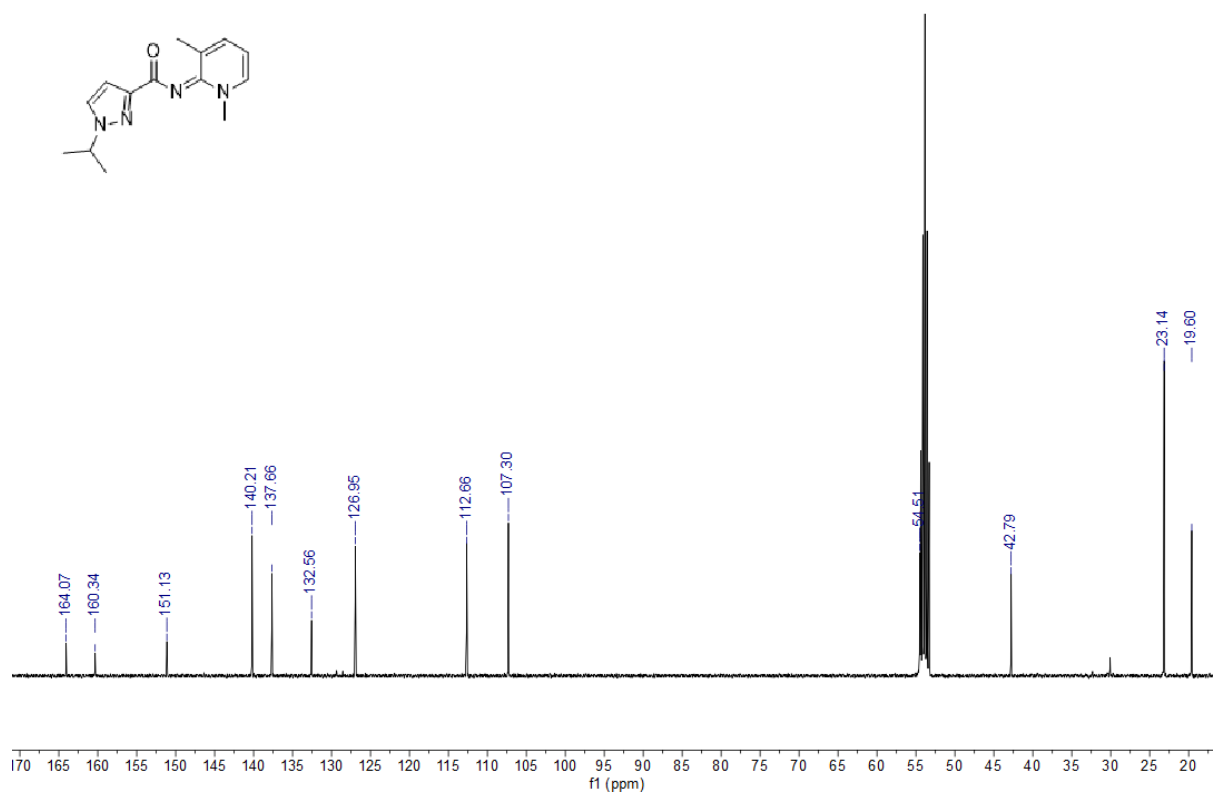

**Figure S49:**  $^{13}\text{C}\{^1\text{H}\}$  NMR spectrum ( $\text{CD}_2\text{Cl}_2$ , 298 K, 101 MHz) of **4g**

### S.1.7 Synthesis of PYA palladium complexes **5a–5g**

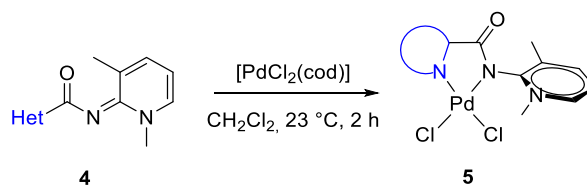

**Scheme S5:** General method for the preparation of heteroaryl-PYA Pd complexes **5a–g**.

**General procedure IV:** Under a  $\text{N}_2$  atmosphere, the neutral PYA **4** (0.5 mmol, 1.05 eq.) and  $[\text{PdCl}_2(\text{cod})]$  (0.5 mmol, 1 eq.) were dissolved in dry  $\text{CH}_2\text{Cl}_2$  (5 mL). The mixture was stirred at  $23\text{ }^\circ\text{C}$  for 2 h and then concentrated to 2 mL. Addition of  $\text{Et}_2\text{O}$  (10 mL) gave a precipitate, which was filtered off, washed several times with  $\text{Et}_2\text{O}$ , and then dried in vacuo to give the corresponding Pd complex **5**.

### Synthesis of complex **5a**

Following the general procedure IV, reaction of **4a** (270 mg, 1.19 mmol) and [PdCl<sub>2</sub>(cod)] (308 mg, 1.08 mmol) yielded complex **5a** as a bright orange solid (424 mg, 97%). Spectroscopical data are in agreement with literature values.<sup>S1</sup> <sup>1</sup>H NMR (400 MHz, CD<sub>3</sub>CN, 298 K): δ = 9.15 (d, *J*<sub>HH</sub> = 5.6, 1.5 Hz, 1H, CH<sub>pyr</sub>), 8.38 (d, <sup>3</sup>*J*<sub>HH</sub> = 6.2, 1H, CH<sub>PYA</sub>), 8.23 (d, <sup>3</sup>*J*<sub>HH</sub> = 7.7, 1H, CH<sub>PYA</sub>), 8.16 (td, *J*<sub>HH</sub> = 7.7, 1.5 Hz, 1H, CH<sub>pyr</sub>), 7.88 (dd, *J*<sub>HH</sub> = 7.7, 1.6 Hz, 1H, CH<sub>pyr</sub>), 7.69 (ddd, *J*<sub>HH</sub> = 7.7, 5.6, 1.6 Hz, 1H, CH<sub>pyr</sub>), 7.60 (d, <sup>3</sup>*J*<sub>HH</sub> = 7.7, 6.2, 1H, CH<sub>PYA</sub>), 4.26 (s, 3H, NCH<sub>3</sub>), 2.49 (s, 3H, PYA-CCH<sub>3</sub>) ppm.

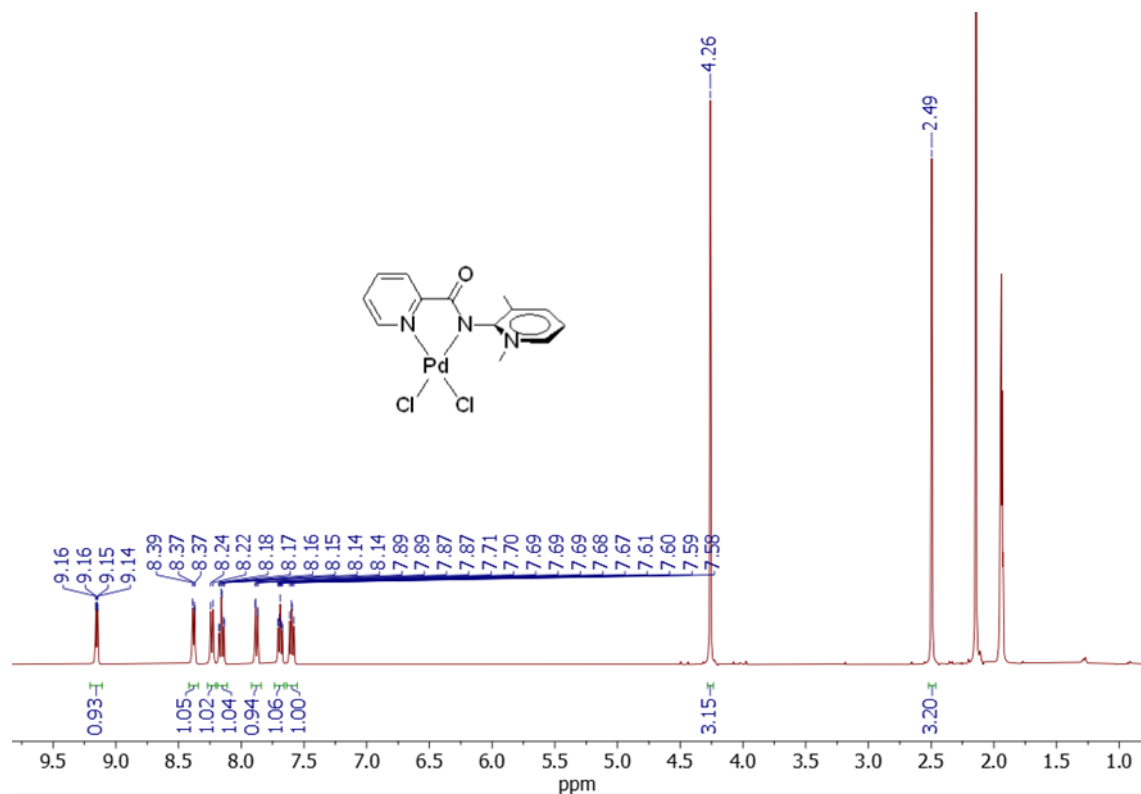

Figure S50: <sup>1</sup>H NMR spectrum (CD<sub>2</sub>Cl<sub>2</sub>, 298 K, 400 MHz) of **5a**

### Synthesis of complex **5b**

Complex **5b** was prepared according to the general procedure IV from ligand **4b** (120 mg, 0.5 mmol) and [PdCl<sub>2</sub>(cod)] (159.8 mg, 0.5 mmol) and isolated as a yellow powder (190 mg, 95%). Crystals suitable for X-ray diffraction were grown by slow diffusion of Et<sub>2</sub>O into a CH<sub>2</sub>Cl<sub>2</sub> solution of **5b**. <sup>1</sup>H NMR (400 MHz, CD<sub>2</sub>Cl<sub>2</sub>) δ = 8.50 (d, <sup>3</sup>*J*<sub>HH</sub> = 1.1 Hz, 1H, CH<sub>oxa</sub>), 8.19 (s, 2H, CH<sub>oxa</sub> + CH<sub>PYA</sub>), 8.15 (d, <sup>3</sup>*J*<sub>HH</sub> = 7.8 Hz, 1H, CH<sub>PYA</sub>), 7.51 (dd, <sup>3</sup>*J*<sub>HH</sub> = 7.8, 6.2 Hz, 1H, CH<sub>PYA</sub>), 4.33 (s, 3H, NCH<sub>3</sub>), 2.57 (s, 3H, C-CH<sub>3</sub>) ppm. <sup>13</sup>C{<sup>1</sup>H} NMR (101 MHz, CD<sub>2</sub>Cl<sub>2</sub>, 298K) δ = 163.45 (CO), 157.94 (C<sub>PYA</sub>), 152.28 (CH<sub>oxa</sub>), 146.05 (CH<sub>PYA</sub>), 141.55 (CH<sub>oxa</sub>), 141.04 (C<sub>oxa</sub>), 138.94 (CH<sub>PYA</sub>), 136.63 (C<sub>PYA</sub>Me), 122.98 (CH<sub>PYA</sub>), 45.53 (NCH<sub>3</sub>), 18.65 (pyr-CH<sub>3</sub>) ppm. HR-MS (m/z) calculated for C<sub>11</sub>H<sub>11</sub>ClN<sub>3</sub>O<sub>2</sub>Pd [M-Cl]<sup>+</sup> = 357.9575; found: 357.9565. Elemental Analysis calculated for C<sub>11</sub>H<sub>11</sub>Cl<sub>2</sub>N<sub>3</sub>O<sub>2</sub>Pd x 0.2 CH<sub>2</sub>Cl<sub>2</sub> (%): C 32.69, H 2.79, N 10.21%; found: C 32.94, H 2.65, N 9.77%.

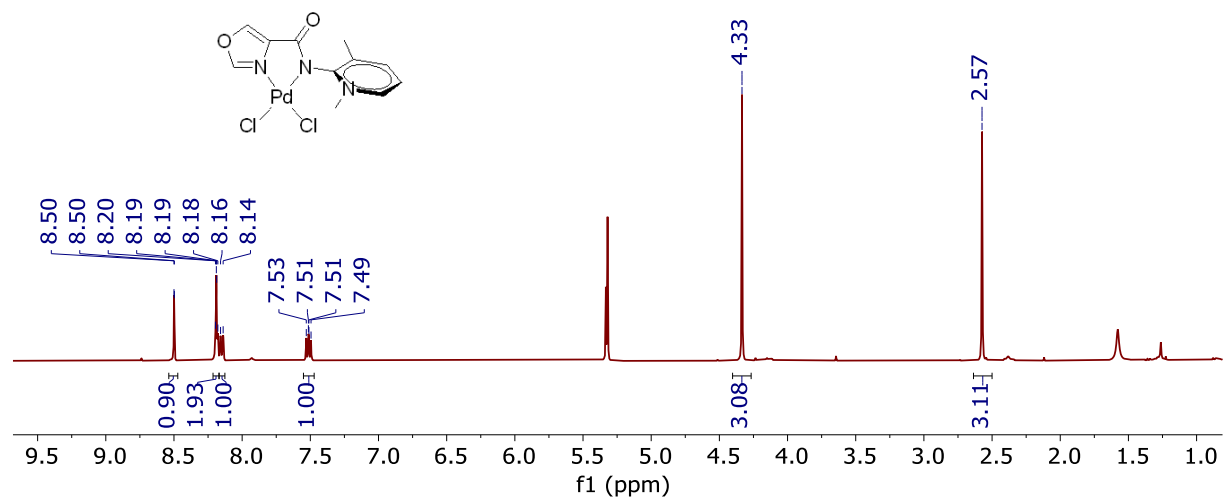

Figure S51:  $^1\text{H}$  NMR spectrum ( $\text{CD}_2\text{Cl}_2$ , 298 K, 400 MHz) of **5b**

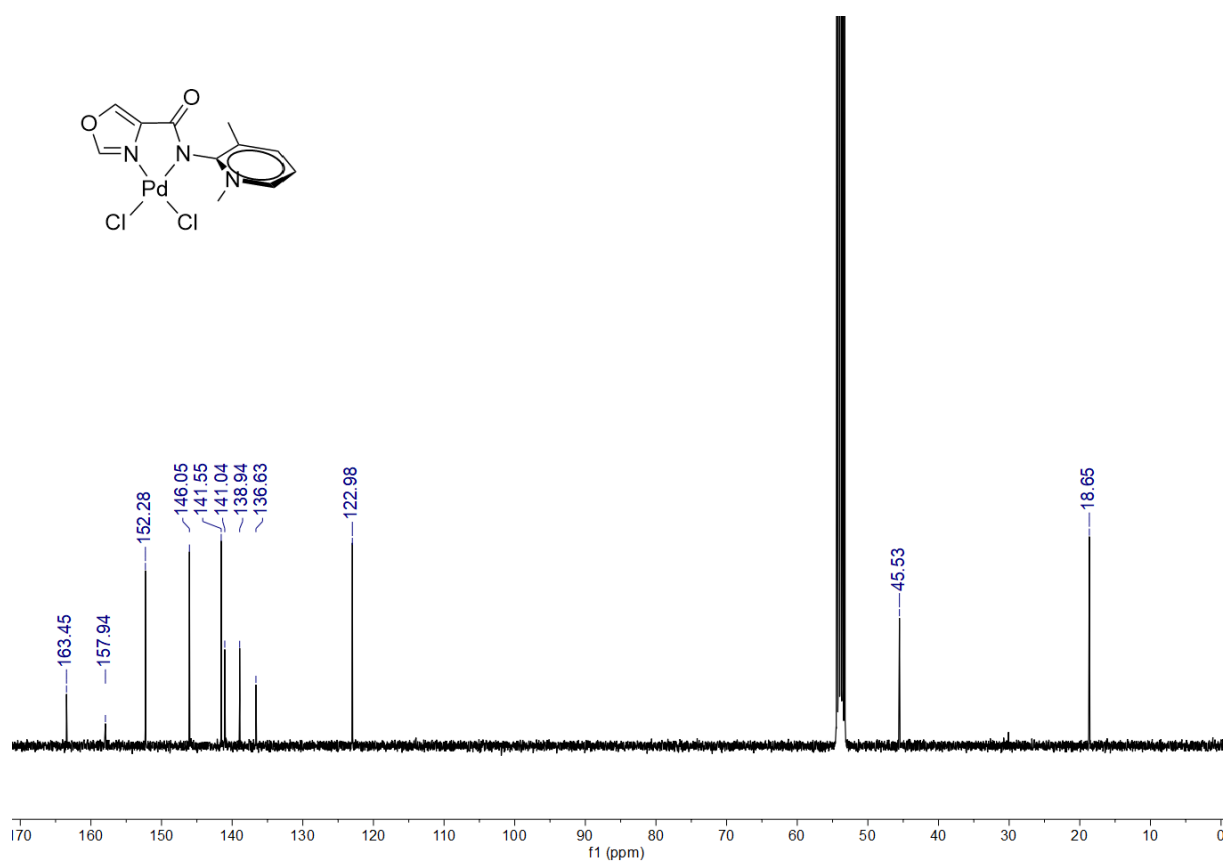

Figure S52:  $^{13}\text{C}\{^1\text{H}\}$  NMR spectrum ( $\text{CD}_2\text{Cl}_2$ , 298 K, 101 MHz) of **5b**

### Synthesis of complex **5c**

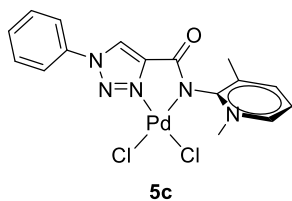

Complex **5c** was prepared according to the general procedure IV from ligand **4c** (50.1 mg, 0.17 mmol) and [PdCl<sub>2</sub>(cod)] (74.21 mg, 0.26 mmol) and was obtained as a yellow powder (68.2 mg, 89%). <sup>1</sup>H NMR (400 MHz, DMSO-*d*<sub>6</sub>) δ = 9.56 (s, 1H, CH<sub>trz</sub>), 8.80 (d, <sup>3</sup>J<sub>HH</sub> = 6.2 Hz, 1H, CH<sub>PYA</sub>), 8.40 (d, <sup>3</sup>J<sub>HH</sub> = 7.6 Hz, 1H, CH<sub>PYA</sub>), 7.93 (m, 2H, CH<sub>Phe</sub>), 7.77 (apparent triplet, 1H, CH<sub>PYA</sub>), 7.67 (m, 3H, CH<sub>Phe</sub>), 4.26 (s, 3H, N<sub>PYA</sub>CH<sub>3</sub>), 2.46 (s, 3H, C<sub>PYA</sub>CH<sub>3</sub>) ppm. <sup>13</sup>C{<sup>1</sup>H} NMR (101 MHz, CD<sub>2</sub>Cl<sub>2</sub>, 298K) δ = 162.30 (CO), 156.00 (C<sub>PYA</sub>), 145.82 (CH<sub>PYA</sub>), 143.82 (C<sub>trz</sub>), 142.41 (CH<sub>PYA</sub>), 136.67 (C<sub>Phe</sub>), 135.98 (C<sub>PYA</sub>Me), 130.35 (CH<sub>Phe</sub>), 130.05 (CH<sub>Phe</sub>), 125.97 (CH<sub>PYA</sub>), 123.01 (CH<sub>trz</sub>), 121.35 (CH<sub>Phe</sub>), 43.96 (N<sub>PYA</sub>CH<sub>3</sub>), 17.54 (C<sub>PYA</sub>CH<sub>3</sub>) ppm. HR-MS (m/z) calculated for C<sub>18</sub>H<sub>18</sub>ClN<sub>6</sub>OPd [M-Cl+CH<sub>3</sub>CN]<sup>+</sup> = 475.03; found: 475.0253. Elemental Analysis calculated for C<sub>16</sub>H<sub>15</sub>Cl<sub>2</sub>N<sub>5</sub>OPd x 0.5 CH<sub>2</sub>Cl<sub>2</sub>: C 38.62, H 3.14, N 13.65%; found: C 38.77, H 3.12, N 13.46%.

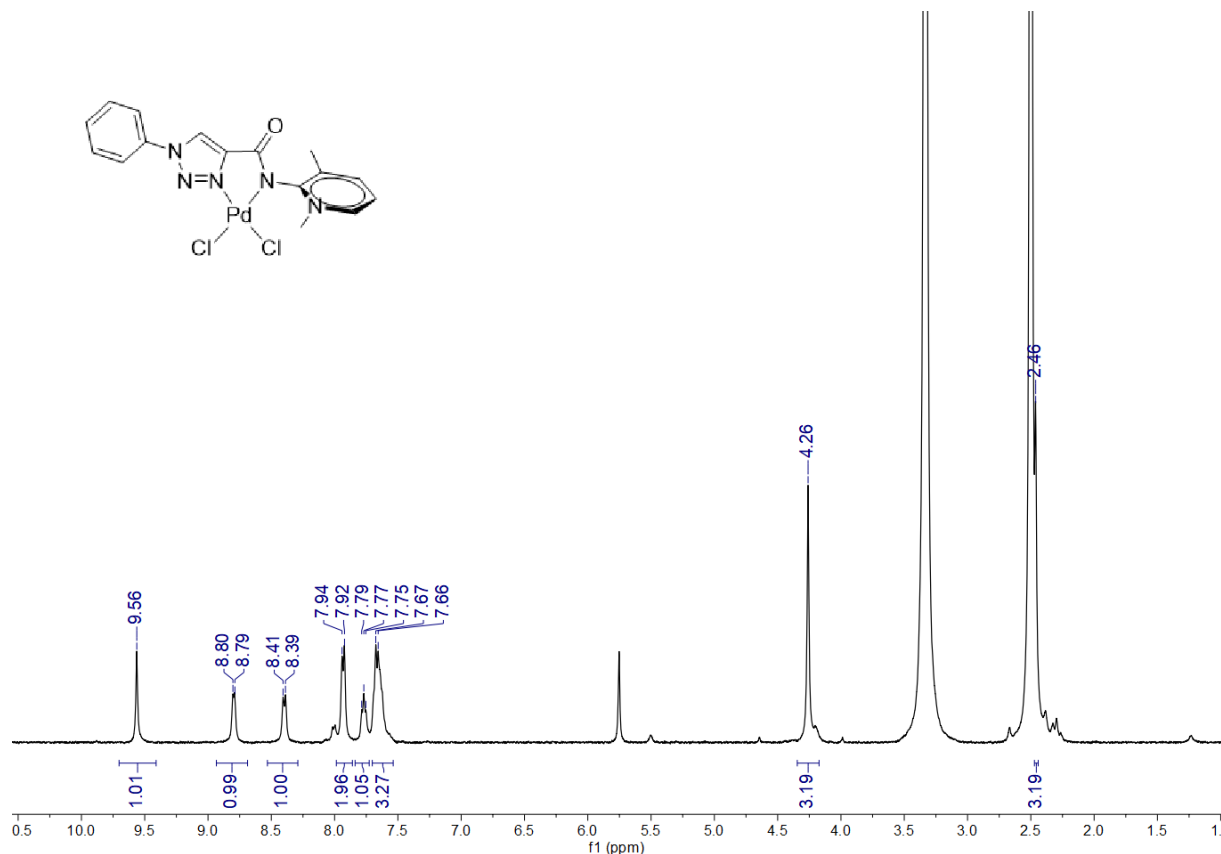

Figure S53: <sup>1</sup>H NMR spectrum (DMSO-*d*<sub>6</sub>, 298 K, 400 MHz) of **5c**

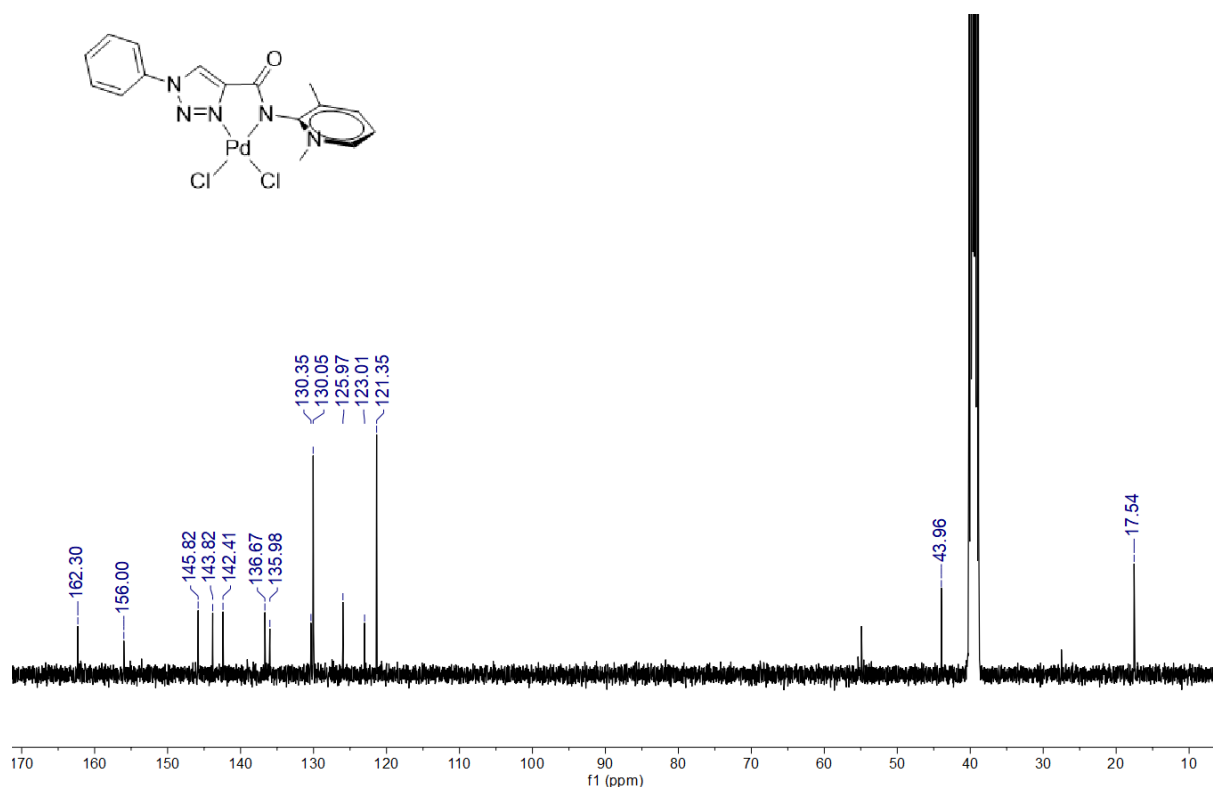

**Figure S54:**  $^{13}\text{C}\{^1\text{H}\}$  NMR spectrum ( $\text{DMSO-}d_6$ , 298 K, 101 MHz) of **5c**

### Synthesis of complex **5d**

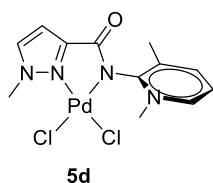

Complex **5d** was prepared according to the general procedure IV from **4d** (76 mg, 0.33 mmol) and  $[\text{PdCl}_2(\text{cod})]$  (89.85 mg, 0.314 mmol) and was isolated as an orange powder (120 mg, 93%). Crystals suitable for Xray diffraction were grown by slow diffusion of  $\text{Et}_2\text{O}$  into a MeOH solution of **5d**.  $^1\text{H}$  NMR (400 MHz,  $\text{CD}_2\text{Cl}_2$ )  $\delta$  = 8.16 - 8.09 (m, 2H,  $\text{CH}_{\text{PYA}}$ ), 7.55 - 7.38 (m, 2H,  $\text{CH}_{\text{PYA}} + \text{CH}_{\text{prz}}$ ), 6.65 (d,  $^3J_{\text{HH}} = 2.7$  Hz, 1H,  $\text{CH}_{\text{prz}}$ ), 4.31 (s, 3H,  $\text{N}_{\text{PYA}}\text{-CH}_3$ ), 4.23 (s, 3H,  $\text{N}_{\text{prz}}\text{-CH}_3$ ), 2.57 (s, 3H,  $\text{C-CH}_3$ ) ppm.  $^{13}\text{C}\{^1\text{H}\}$  NMR (101 MHz,  $\text{CD}_2\text{Cl}_2$ , 298K)  $\delta$  = 164.97 (CO), 149.19 ( $\text{C}_{\text{PYA}}$ ), 145.63 ( $\text{CH}_{\text{PYA}}$ ), 140.69 ( $\text{CH}_{\text{PYA}}$ ), 139.52 ( $\text{C}_{\text{PYA}}\text{-Me}$ ), 135.22 ( $\text{CH}_{\text{prz}}$ ), 122.68 ( $\text{CH}_{\text{PYA}}$ ), 106.83 ( $\text{CH}_{\text{prz}}$ ), 45.41 ( $\text{N}_{\text{PYA}}\text{CH}_3$ ), 41.62 ( $\text{N}_{\text{prz}}\text{CH}_3$ ), 18.72 ( $\text{C-CH}_3$ ) ppm. HR-MS ( $m/z$ ) calculated for  $\text{C}_{14}\text{H}_{17}\text{ClN}_5\text{OPd} [\text{M-Cl} + \text{CH}_3\text{CN}]^+$  = 412.0156; found: 412.0155. Elemental Analysis calculated for  $\text{C}_{12}\text{H}_{14}\text{Cl}_2\text{N}_4\text{OPd} \times 0.25 \text{CH}_2\text{Cl}_2$ : C 34.31, H 3.41, N 13.07%; found: C 34.57, H 3.48, N 12.78.

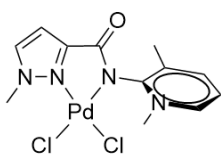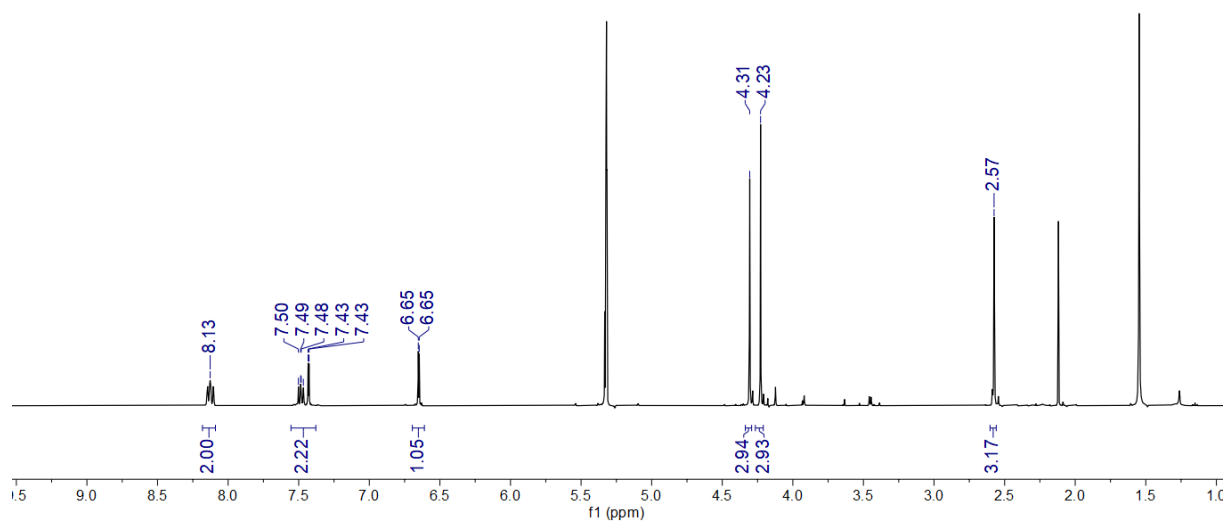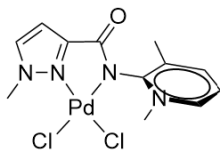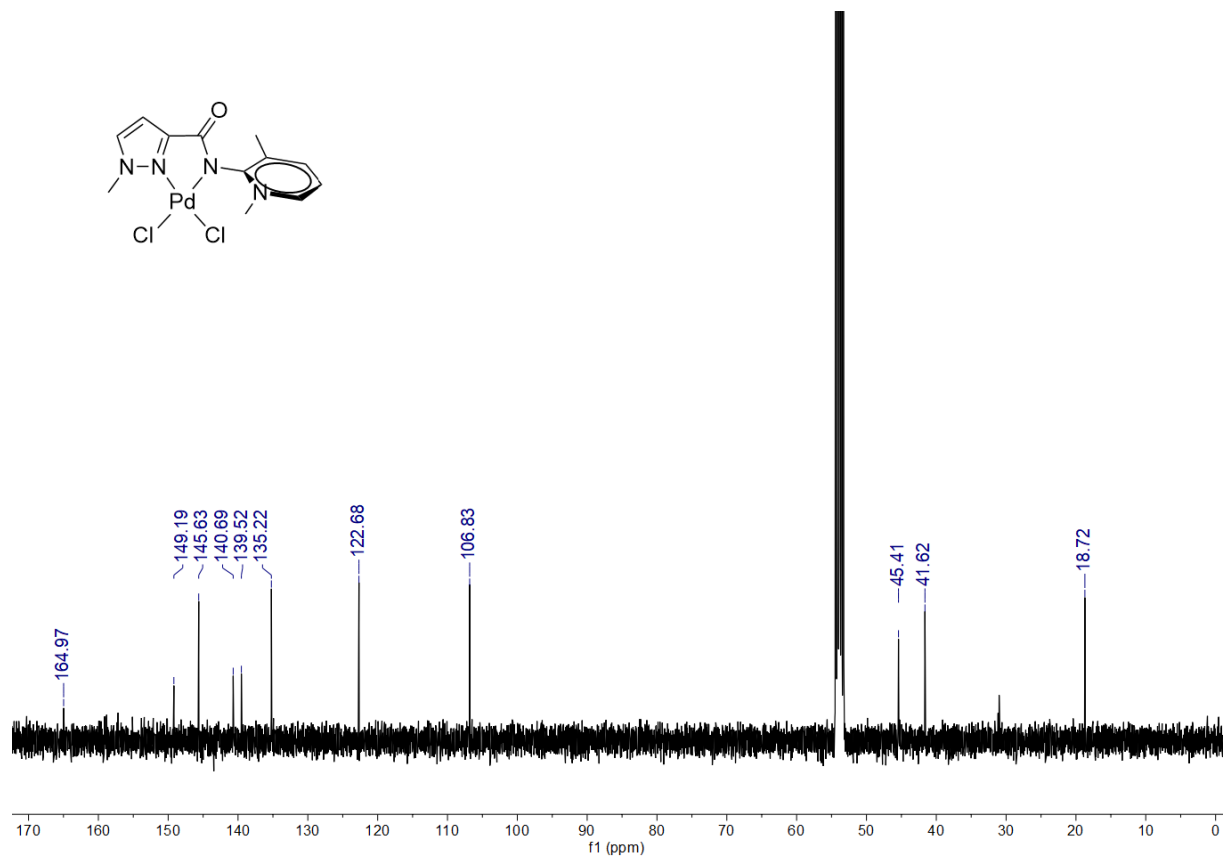



### Synthesis of complex **5e**

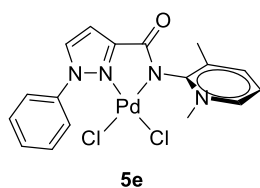

Complex **5e** was prepared according to the general procedure IV from **4e** (80.2 mg, 0.27 mmol) and  $[\text{PdCl}_2(\text{cod})]$  (74.3 mg, 0.26 mmol) and was obtained as a yellow powder (113 mg, 93%).  $^1\text{H}$  NMR (400 MHz,  $\text{CD}_2\text{Cl}_2$ )  $\delta$  = 8.16 (d,  $^3J_{\text{HH}}$  = 6.3 Hz, 1H,  $\text{CH}_{\text{PYA}}$ ), 8.12 (d,  $^3J_{\text{HH}}$  = 7.7 Hz, 1H,  $\text{CH}_{\text{PYA}}$ ), 7.69 (d,  $^3J_{\text{HH}}$  = 2.7 Hz, 1H,  $\text{CH}_{\text{prz}}$ ), 7.59-7.46 (m, 6H,  $\text{CH}_{\text{Phe}}$  +  $\text{CH}_{\text{PYA}}$ ), 6.87 (d,  $^3J_{\text{HH}}$  = 2.7 Hz, 1H,  $\text{CH}_{\text{prz}}$ ), 4.35 (s, 3H,  $\text{N}_{\text{PYA}}\text{CH}_3$ ), 2.62 (s, 3H,  $\text{C}_{\text{PYA}}\text{CH}_3$ ) ppm.  $^{13}\text{C}\{^1\text{H}\}$  NMR (101 MHz,  $\text{CD}_2\text{Cl}_2$ , 298K)  $\delta$  = 164.65 (CO), 158.61 ( $\text{C}_{\text{PYA}}$ ), 151.11 ( $\text{C}_{\text{prz}}$ ), 145.63 ( $\text{CH}_{\text{PYA}}$ ), 140.77 ( $\text{CH}_{\text{PYA}}$ ), 139.36 ( $\text{C}_{\text{Phe}}$ ), 138.66 ( $\text{C}_{\text{PYA}}\text{-Me}$ ), 136.29 ( $\text{CH}_{\text{prz}}$ ), 130.33 ( $\text{CH}_{\text{Phe}}$ ), 129.23 ( $\text{CH}_{\text{Phe}}$ ), 126.72 ( $\text{CH}_{\text{Phe}}$ ), 122.63 ( $\text{CH}_{\text{PYA}}$ ), 107.67 ( $\text{CH}_{\text{prz}}$ ), 45.48 ( $\text{N}_{\text{PYA}}\text{CH}_3$ ), 18.81 ( $\text{C}_{\text{PYA}}\text{CH}_3$ ) ppm. HR-MS ( $m/z$ ) calculated for  $\text{C}_{21}\text{H}_{19}\text{Cl}_2\text{N}_5\text{OPd}$   $[\text{M}-\text{Cl}+\text{CH}_3\text{CN}]^+$  = 474.0313; found: 474.0305. Elemental Analysis calculated for  $\text{C}_{17}\text{H}_{16}\text{Cl}_2\text{N}_4\text{OPd}$ : C 44.44, H 3.89, N 11.39%; found: C 44.68, H 3.64, N 11.30%.

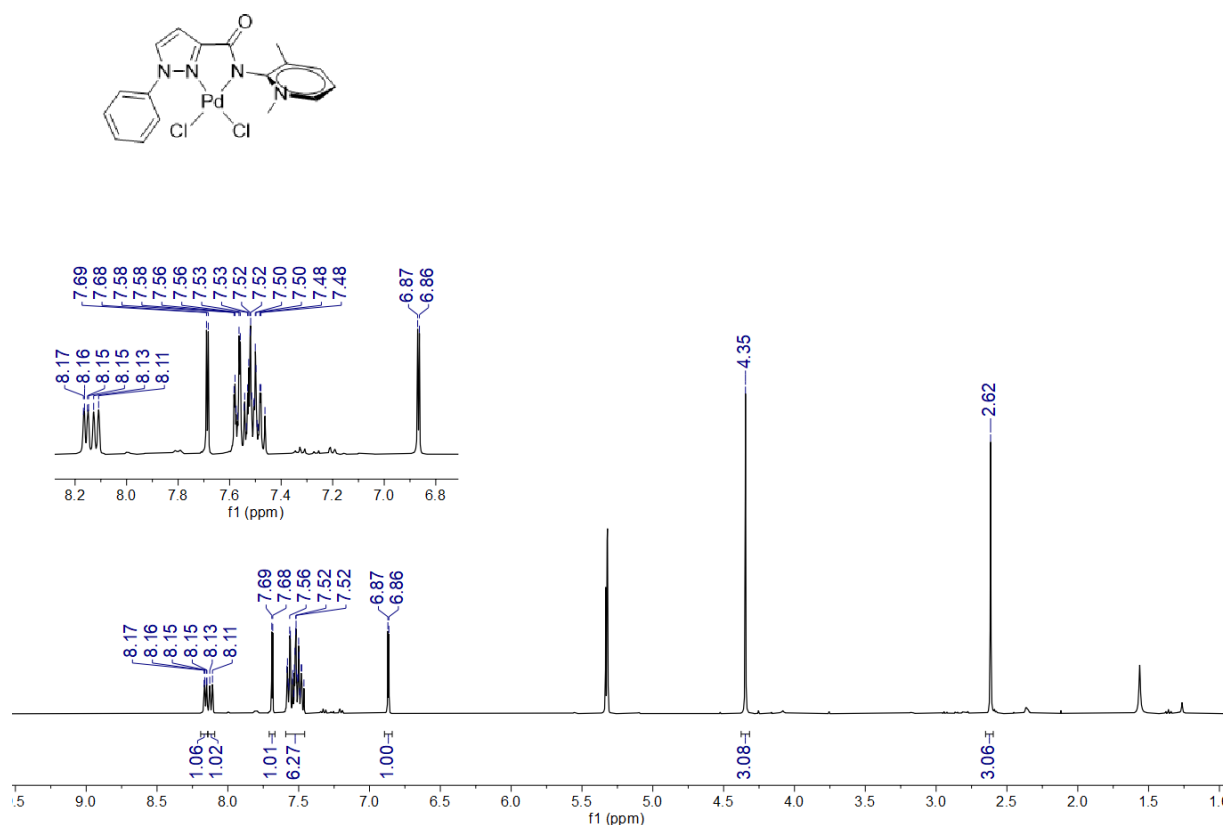

Figure S57:  $^1\text{H}$  NMR spectrum ( $\text{CD}_2\text{Cl}_2$ , 298 K, 400 MHz) of **5e**

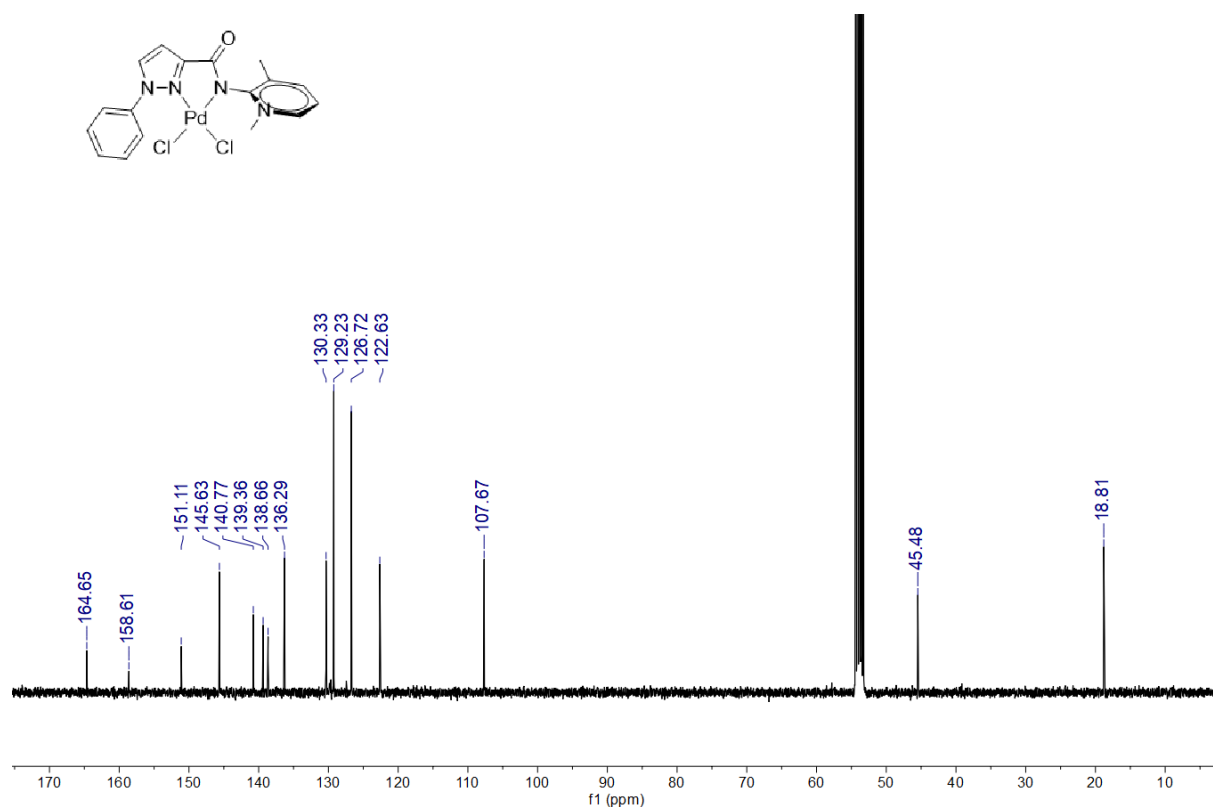

**Figure S58:**  $^{13}\text{C}\{^1\text{H}\}$  NMR spectrum ( $\text{CD}_2\text{Cl}_2$ , 298 K, 101 MHz) of **5e**

### Synthesis of complex **5f**

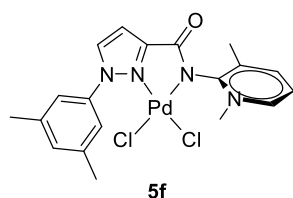

Complex **5f** was prepared according to the general procedure IV from ligand **4f** (90.3 mg, 0.28 mmol) and  $[\text{PdCl}_2(\text{cod})]$  (76.3 mg, 0.267 mmol) and was isolated as a yellow powder (130 mg, 97%). Crystals suitable for X-ray diffraction were grown by slow diffusion of  $\text{Et}_2\text{O}$  into a  $\text{CH}_2\text{Cl}_2$  solution of **5f**.  $^1\text{H}$  NMR (400 MHz,  $\text{CD}_2\text{Cl}_2$ )  $\delta$  = 8.24 – 8.05 (m, 2H,  $\text{CH}_{\text{PYA}}$ ), 7.66 (s, 1H,  $\text{CH}_{\text{prz}}$ ), 7.49 (m, 1H,  $\text{CH}_{\text{PYA}}$ ), 7.17 (m, 3H,  $\text{CH}_{\text{Phe}}$ ), 6.84 (s, 1H,  $\text{CH}_{\text{prz}}$ ), 4.34 (s, 3H,  $\text{N}_{\text{PYA}}\text{CH}_3$ ), 2.61 (s, 3H,  $\text{C}_{\text{PYA}}\text{CH}_3$ ), 2.40 (s, 6H,  $\text{Phe-CH}_3$ ) ppm.  $^{13}\text{C}\{^1\text{H}\}$  NMR (101 MHz,  $\text{CD}_2\text{Cl}_2$ , 298K)  $\delta$  = 164.32 (CO), 158.26 ( $\text{C}_{\text{PYA}}$ ), 150.48 ( $\text{C}_{\text{prz}}$ ), 145.18 ( $\text{CH}_{\text{PYA}}$ ), 140.39 ( $\text{CH}_{\text{PYA}}$ ), 138.95 ( $\text{C}_{\text{Phe}}$ ), 138.71 ( $\text{Phe-CCH}_3$ ), 137.85 ( $\text{C}_{\text{PYA-Me}}$ ), 135.64 ( $\text{CH}_{\text{prz}}$ ), 131.28 ( $\text{CH}_{\text{Phe}}$ ), 123.78 ( $\text{CH}_{\text{Phe}}$ ), 122.20 ( $\text{CH}_{\text{PYA}}$ ), 107.12 ( $\text{CH}_{\text{prz}}$ ), 45.03 ( $\text{N}_{\text{PYA}}\text{CH}_3$ ), 20.98 ( $\text{Phe-CH}_3$ ), 18.38 ( $\text{C}_{\text{PYA-CH}_3}$ ) ppm. HR-MS ( $m/z$ ) calculated for  $\text{C}_{23}\text{H}_{23}\text{ClN}_5\text{OPd} [\text{M-Cl}+\text{CH}_3\text{CN}]^+$  = 502.0626; found: 502.0612. Elemental Analysis calculated for  $\text{C}_{19}\text{H}_{20}\text{Cl}_2\text{N}_4\text{OPd} \times 0.25 \text{CH}_2\text{Cl}_2$ : C 44.55, H 3.98, N 10.80%; found: C 44.85, H 3.87, N 10.33%.

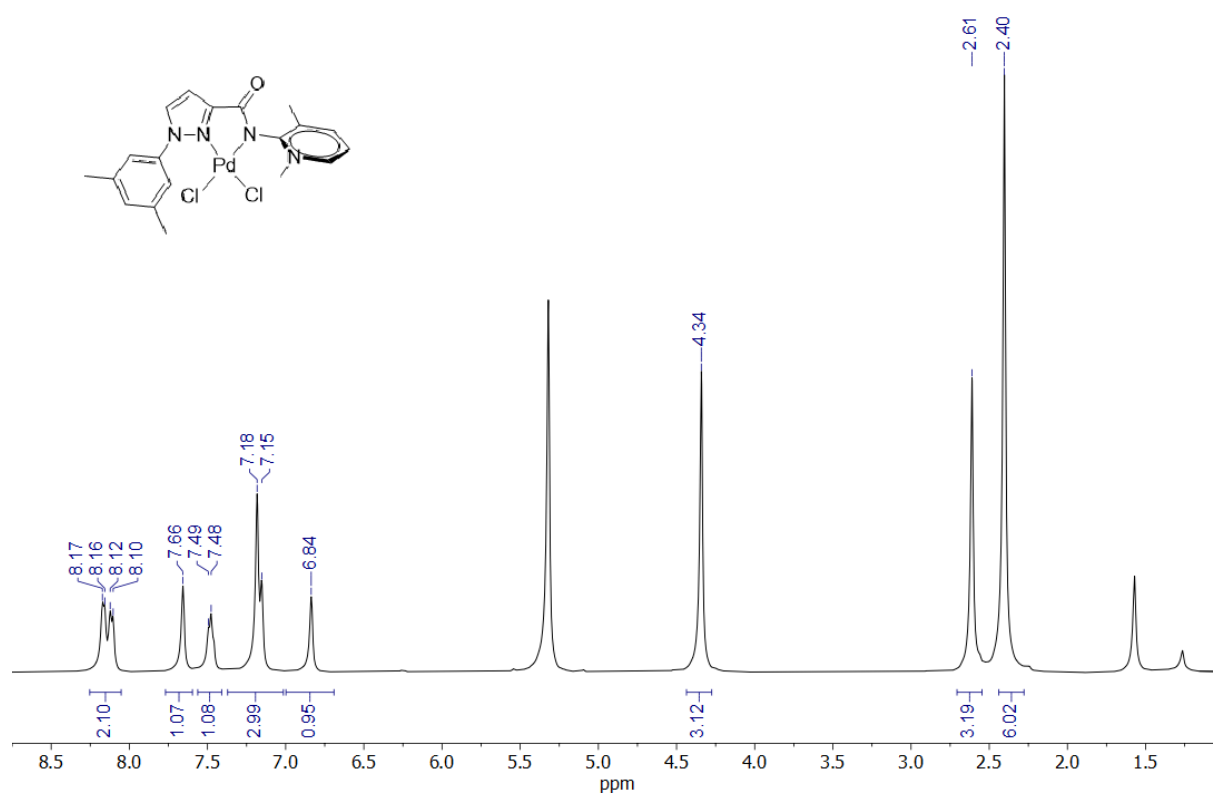

**Figure S59:**  $^1\text{H}$  NMR spectrum ( $\text{CD}_2\text{Cl}_2$ , 298 K, 400 MHz) of **5f**

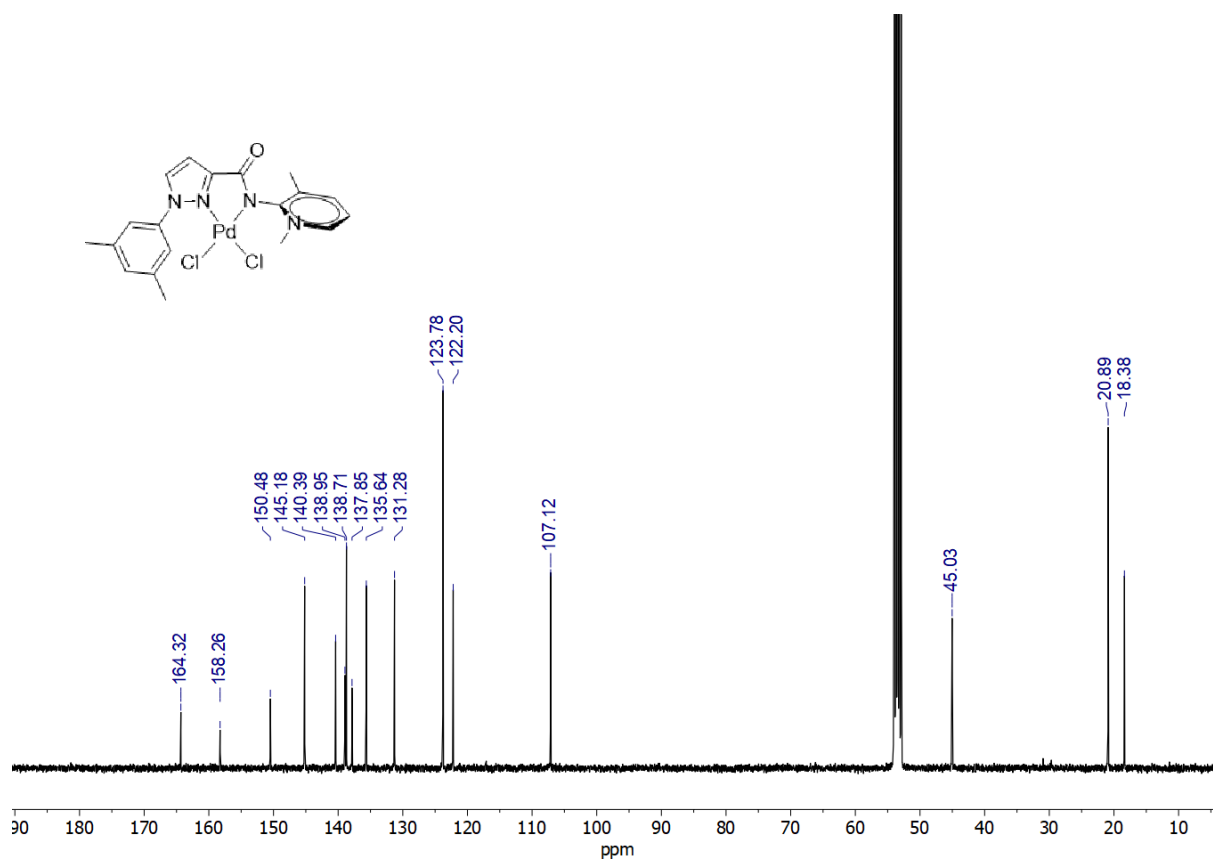

**Figure S60:**  $^{13}\text{C}\{^1\text{H}\}$  NMR spectrum ( $\text{CD}_2\text{Cl}_2$ , 298 K, 101 MHz) of **5f**

### Synthesis of heteroaryl-PYA Pd complex **5g**

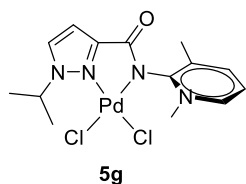

Complex **5g** was prepared according to the general procedure IV from ligand **4g** (101.1 mg, 0.387 mmol) and [PdCl<sub>2</sub>(cod)] (106.1 mg, 0.37 mmol) and was obtained as a yellow powder (134.2 mg, 84%). Crystals suitable for X-ray diffraction were grown by slow diffusion of Et<sub>2</sub>O into a CH<sub>2</sub>Cl<sub>2</sub> solution of **5g**. <sup>1</sup>H NMR (400 MHz, CD<sub>2</sub>Cl<sub>2</sub>) δ = 8.21 - 8.03 (m, 2H, CH<sub>PYA</sub>), 7.58 (d, <sup>3</sup>J<sub>HH</sub> = 2.7 Hz, 1H, CH<sub>prz</sub>), 7.48 (apparent triplet, 1H, CH<sub>PYA</sub>), 6.69 (d, <sup>3</sup>J<sub>HH</sub> = 2.7 Hz, 1H, CH<sub>prz</sub>), 5.96 (hept, <sup>3</sup>J<sub>HH</sub> = 6.7 Hz, 1H, N<sub>prz</sub>-CH), 4.31 (s, 3H, N<sub>PYA</sub>-CH<sub>3</sub>), 2.58 (s, 3H, C-CH<sub>3</sub>), 1.50 (d, <sup>3</sup>J<sub>HH</sub> = 1.0 Hz, 6H, N<sub>prz</sub>-C-CH<sub>3</sub>) ppm. <sup>13</sup>C {<sup>1</sup>H} NMR (101 MHz, CD<sub>2</sub>Cl<sub>2</sub>, 298K) δ = 165.04 (CO), 158.88 (C<sub>PYA</sub>), 148.42 (CH<sub>PYA</sub>), 145.56 (CH<sub>PYA</sub>), 140.69 (C<sub>PYA</sub>-Me), 139.57 (CH<sub>PYA</sub>), 129.93 (CH<sub>prz</sub>), 122.66 (CH<sub>PYA</sub>), 107.09 (CH<sub>prz</sub>), 54.68 (N<sub>prz</sub>CH), 45.41 (N<sub>PYA</sub>CH<sub>3</sub>), 23.47 (N<sub>prz</sub>-C-CH<sub>3</sub>), 23.33 (N<sub>prz</sub>-C-CH<sub>3</sub>), 18.75 (C-CH<sub>3</sub>) ppm. HR-MS (m/z) calculated for C<sub>14</sub>H<sub>18</sub>Cl<sub>2</sub>N<sub>4</sub>OPd [M-Cl]<sup>+</sup> = 399.0204; found: 399.0205. Elemental Analysis calculated for C<sub>14</sub>H<sub>18</sub>Cl<sub>2</sub>N<sub>4</sub>OPd: C 38.60, H 4.16, N 12.86%; found: C 38.90, H 4.19, N 12.54%.

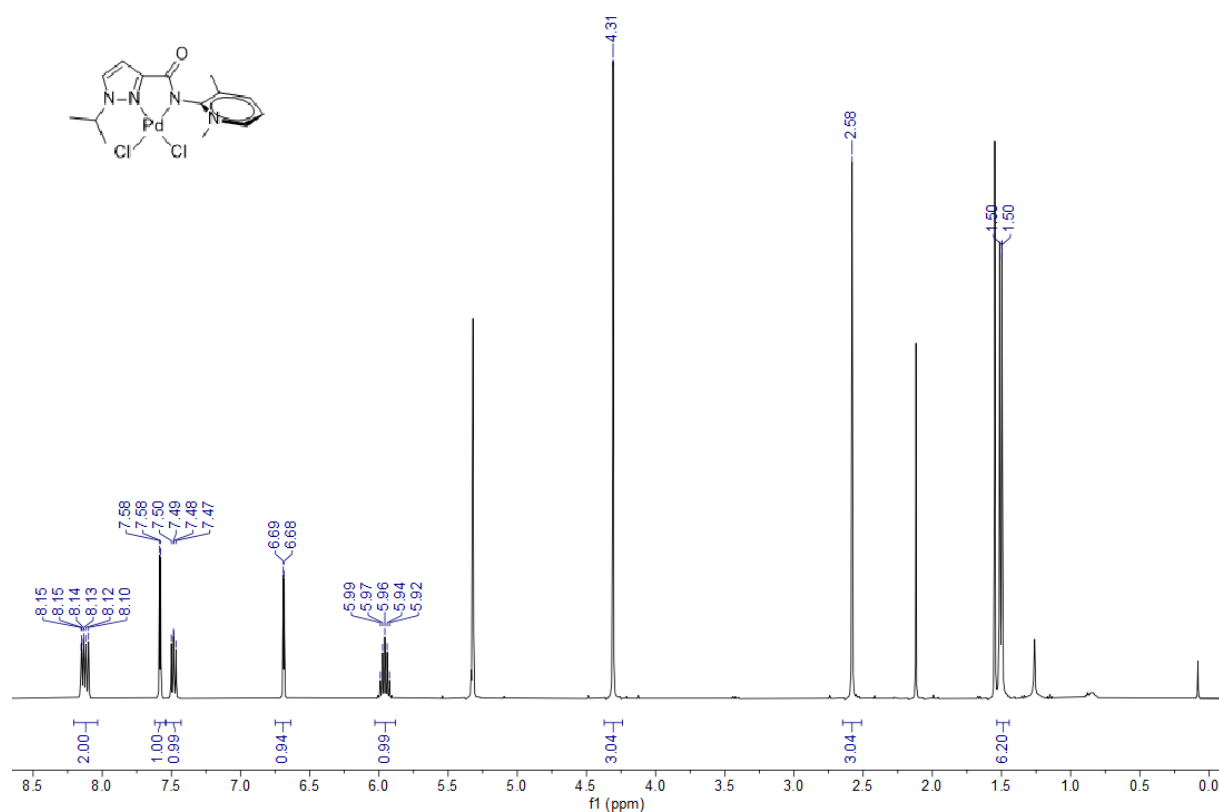

**Figure S61:** <sup>1</sup>H NMR spectrum (DMSO-*d*<sub>6</sub>, 298 K, 400 MHz) of **5g**

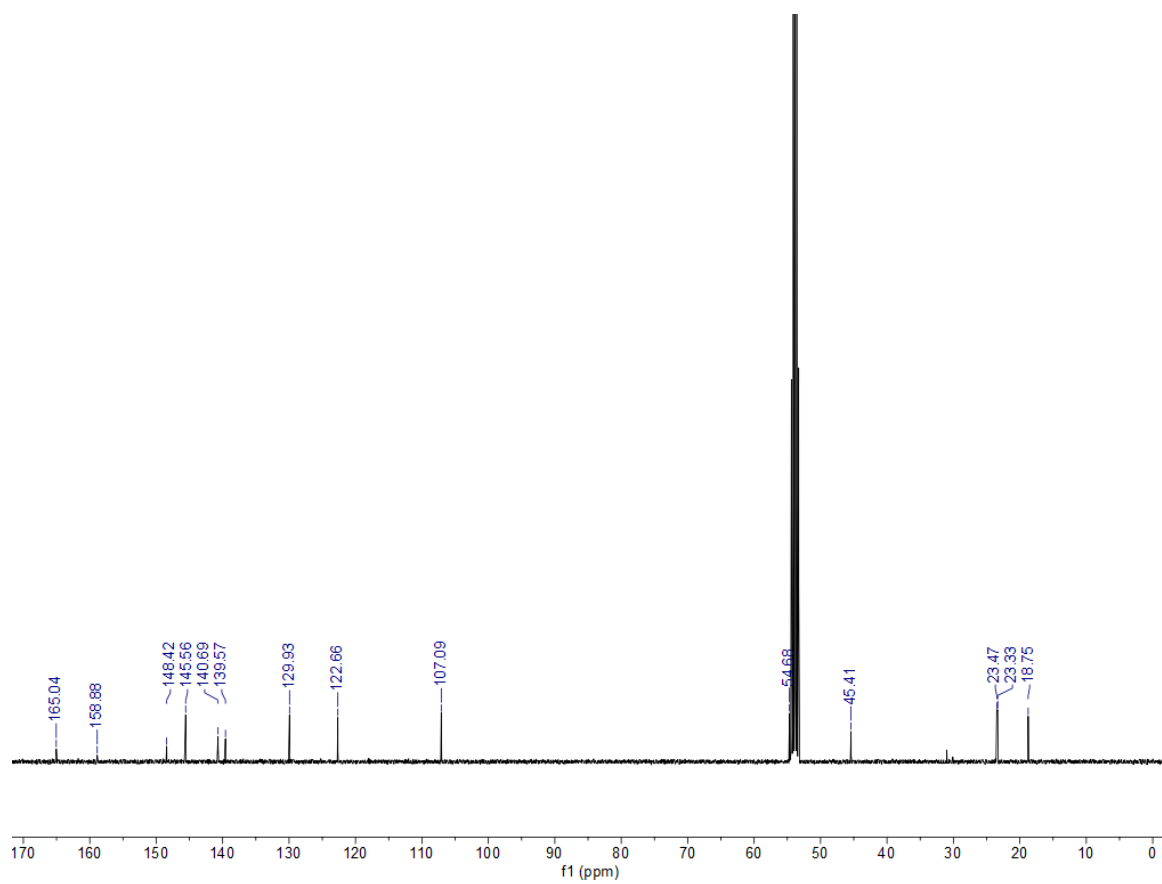

**Figure S62:**  $^{13}\text{C}\{^1\text{H}\}$  NMR spectrum (DMSO- $d_6$ , 298 K, 101 MHz) of **5g**

## S.2 Crystal structure determinations

Crystals of **5b**, **5d**, **5f** and **5g** immersed in parabar oil were mounted at ambient conditions and transferred into the stream of nitrogen (173 K). All measurements were made on a *RIGAKU XtaLAB Synergy R*, HyPix-Arc 100 area-detector diffractometer<sup>S8</sup> using mirror optics monochromated Mo  $K\alpha$  radiation ( $\lambda = 0.71073 \text{ \AA}$ ). Data reduction was performed using the *CrysAlisPro*<sup>S8</sup> program. The intensities were corrected for Lorentz and polarization effects, and a numerical absorption correction based on gaussian integration over a multifaceted crystal model with additional empirical absorption correction using spherical harmonics using SCALE3 ABSPACK in *CrysAlisPro*<sup>S8</sup> was applied. All the structures were solved by intrinsic phasing using *SHELXT*,<sup>S9</sup> which revealed the positions of all non-hydrogen atoms of the title compound. All non-hydrogen atoms were refined anisotropically. H-atoms were assigned in geometrically calculated positions and refined using a riding model where each H-atom was assigned a fixed isotropic displacement parameter with a value equal to 1.2Ueq of its parent atom (1.5Ueq for methyl groups). Refinement of the structure was carried out on  $F^2$  using full-matrix least-squares procedures, which minimized the function  $\Sigma w(F_o^2 - F_c^2)^2$ . The weighting scheme was based on counting statistics and included a factor to downweight the intense reflections. All calculations were performed using the *SHELXL-2014/7*<sup>S10</sup> program in OLEX2.<sup>S11</sup> For complex **5d**, areas containing disorder solvents were found where a satisfactory solvent model might not be achieved; therefore, a solvent mask was used to include the contribution of electron density found in void areas into the calculated structure factor. The total number of electrons found in the void areas is shown in Table S3. For complex **5g**, a disorder model was used for parts of the structure where the occupancies of each disorder component were refined through the use of a free variable. The sum of equivalent components was constrained to 100%. The structure was refined as a two components inversion twin. Data collection and refinement parameters for **5b**, **5d**, **5g** and **5f** are given in Tables S1–S5. Crystallographic data for all structures reported in this paper have been deposited with the Cambridge Crystallographic Data Centre (CCDC) as supplementary publication numbers 2394912–2394915.

**Table S1.** Crystal data and structure refinement for **5b**

|                   |                            |
|-------------------|----------------------------|
| CCDC No           | 2394912                    |
| Empirical formula | $C_{11}H_{11}Cl_2N_3O_2Pd$ |
| Formula weight    | 394.53                     |
| Temperature/K     | 173.00(10)                 |
| Crystal system    | monoclinic                 |
| Space group       | I2/a                       |
| $a/\text{\AA}$    | 19.6202(3)                 |
| $b/\text{\AA}$    | 9.6407(2)                  |
| $c/\text{\AA}$    | 14.9332(3)                 |
| $\alpha/^\circ$   | 90                         |
| $\beta/^\circ$    | 91.131(2)                  |

|                                                |                                                               |
|------------------------------------------------|---------------------------------------------------------------|
| $\gamma/^\circ$                                | 90                                                            |
| Volume/ $\text{\AA}^3$                         | 2824.10(9)                                                    |
| Z                                              | 8                                                             |
| $\rho_{\text{calc}} \text{ g/cm}^3$            | 1.856                                                         |
| $\mu/\text{mm}^{-1}$                           | 1.692                                                         |
| F(000)                                         | 1552.0                                                        |
| Crystal size/ $\text{mm}^3$                    | $0.149 \times 0.113 \times 0.087$                             |
| Radiation                                      | Mo K $\alpha$ ( $\lambda = 0.71073$ )                         |
| 2 $\Theta$ range for data collection/ $^\circ$ | 4.152 to 61.016                                               |
| Index ranges                                   | $-28 \leq h \leq 28, -13 \leq k \leq 13, -21 \leq l \leq 21$  |
| Reflections collected                          | 41482                                                         |
| Independent reflections                        | 4316 [ $R_{\text{int}} = 0.0271, R_{\text{sigma}} = 0.0145$ ] |
| Data/restraints/parameters                     | 4316/0/216                                                    |
| Goodness-of-fit on $F^2$                       | 1.107                                                         |
| Final R indexes [ $I > 2\sigma(I)$ ]           | $R1 = 0.0222, wR2 = 0.0584$                                   |
| Final R indexes [all data]                     | $R1 = 0.0252, wR2 = 0.0595$                                   |
| Largest diff. peak/hole / $e \text{ \AA}^{-3}$ | 0.82/-0.51                                                    |

**Table S2.** Crystal data and structure refinement for **5d**

|                                                |                                                               |
|------------------------------------------------|---------------------------------------------------------------|
| CCDC No                                        | 2394913                                                       |
| Empirical formula                              | $\text{C}_{12}\text{H}_{14}\text{Cl}_2\text{N}_4\text{OPd}$   |
| Formula weight                                 | 407.57                                                        |
| Temperature/K                                  | 173.00(10)                                                    |
| Crystal system                                 | orthorhombic                                                  |
| Space group                                    | Pccn                                                          |
| $a/\text{\AA}$                                 | 10.97050(13)                                                  |
| $b/\text{\AA}$                                 | 23.0363(2)                                                    |
| $c/\text{\AA}$                                 | 14.07250(15)                                                  |
| $\alpha/^\circ$                                | 90                                                            |
| $\beta/^\circ$                                 | 90                                                            |
| $\gamma/^\circ$                                | 90                                                            |
| Volume/ $\text{\AA}^3$                         | 3556.40(7)                                                    |
| Z                                              | 8                                                             |
| $\rho_{\text{calc}} \text{ g/cm}^3$            | 1.522                                                         |
| $\mu/\text{mm}^{-1}$                           | 1.344                                                         |
| F(000)                                         | 1616.0                                                        |
| Crystal size/ $\text{mm}^3$                    | $0.314 \times 0.224 \times 0.184$                             |
| Radiation                                      | Mo K $\alpha$ ( $\lambda = 0.71073$ )                         |
| 2 $\Theta$ range for data collection/ $^\circ$ | 4.112 to 61.012                                               |
| Index ranges                                   | $-15 \leq h \leq 15, -32 \leq k \leq 32, -20 \leq l \leq 20$  |
| Reflections collected                          | 102018                                                        |
| Independent reflections                        | 5437 [ $R_{\text{int}} = 0.0262, R_{\text{sigma}} = 0.0091$ ] |
| Data/restraints/parameters                     | 5437/0/184                                                    |
| Goodness-of-fit on $F^2$                       | 1.110                                                         |
| Final R indexes [ $I > 2\sigma(I)$ ]           | $R1 = 0.0227, wR2 = 0.0603$                                   |
| Final R indexes [all data]                     | $R1 = 0.0247, wR2 = 0.0611$                                   |
| Largest diff. peak/hole / $e \text{ \AA}^{-3}$ | 0.52/-0.40                                                    |

**Table S3.** Crystal data and structure refinement for **5f**

|                                             |                                                                    |
|---------------------------------------------|--------------------------------------------------------------------|
| CCDC No                                     | 2394914                                                            |
| Empirical formula                           | C <sub>19</sub> H <sub>20</sub> N <sub>4</sub> OCl <sub>2</sub> Pd |
| Formula weight                              | 497.69                                                             |
| Temperature/K                               | 173.00(10)                                                         |
| Crystal system                              | monoclinic                                                         |
| Space group                                 | P21/n                                                              |
| a/Å                                         | 11.62997(6)                                                        |
| b/Å                                         | 14.78476(7)                                                        |
| c/Å                                         | 11.92053(6)                                                        |
| α/°                                         | 90                                                                 |
| β/°                                         | 105.0469(5)                                                        |
| γ/°                                         | 90                                                                 |
| Volume/Å <sup>3</sup>                       | 1979.415(18)                                                       |
| Z                                           | 4                                                                  |
| ρ <sub>calc</sub> g/cm <sup>3</sup>         | 1.670                                                              |
| μ/mm <sup>-1</sup>                          | 10.184                                                             |
| F(000)                                      | 1000.0                                                             |
| Crystal size/mm <sup>3</sup>                | 0.146 × 0.124 × 0.07                                               |
| Radiation                                   | Cu Kα (λ = 1.54184)                                                |
| 2θ range for data collection/°              | 9.466 to 147.46                                                    |
| Index ranges                                | -14 ≤ h ≤ 14, -18 ≤ k ≤ 18, -14 ≤ l ≤ 14                           |
| Reflections collected                       | 39723                                                              |
| Independent reflections                     | 4006 [R <sub>int</sub> = 0.0381, R <sub>sigma</sub> = 0.0136]      |
| Data/restraints/parameters                  | 4006/42/267                                                        |
| Goodness-of-fit on F <sup>2</sup>           | 1.170                                                              |
| Final R indexes [I > 2σ (I)]                | R1 = 0.0237, wR2 = 0.0615                                          |
| Final R indexes [all data]                  | R1 = 0.0238, wR2 = 0.0615                                          |
| Largest diff. peak/hole / e Å <sup>-3</sup> | 0.43/-0.51                                                         |

**Table S4.** Crystal data and structure refinement for **5g**

|                                     |                                                                    |
|-------------------------------------|--------------------------------------------------------------------|
| CCDC No                             | 2394915                                                            |
| Empirical formula                   | C <sub>14</sub> H <sub>18</sub> Cl <sub>2</sub> N <sub>4</sub> OPd |
| Formula weight                      | 435.62                                                             |
| Temperature/K                       | 173.00(10)                                                         |
| Crystal system                      | orthorhombic                                                       |
| Space group                         | P212121                                                            |
| a/Å                                 | 8.91557(12)                                                        |
| b/Å                                 | 10.26115(13)                                                       |
| c/Å                                 | 18.9836(2)                                                         |
| α/°                                 | 90                                                                 |
| β/°                                 | 90                                                                 |
| γ/°                                 | 90                                                                 |
| Volume/Å <sup>3</sup>               | 1736.70(4)                                                         |
| Z                                   | 4                                                                  |
| ρ <sub>calc</sub> g/cm <sup>3</sup> | 1.666                                                              |
| μ/mm <sup>-1</sup>                  | 1.382                                                              |



|                                                  |                                                                        |
|--------------------------------------------------|------------------------------------------------------------------------|
| F(000)                                           | 872.0                                                                  |
| Crystal size/mm <sup>3</sup>                     | 0.338 × 0.117 × 0.069                                                  |
| Radiation                                        | Mo K $\alpha$ ( $\lambda$ = 0.71073)                                   |
| 2 $\theta$ range for data collection/ $^{\circ}$ | 4.292 to 61.008                                                        |
| Index ranges                                     | -12 $\leq$ h $\leq$ 12, -14 $\leq$ k $\leq$ 14, -27 $\leq$ l $\leq$ 27 |
| Reflections collected                            | 105258                                                                 |
| Independent reflections                          | 5302 [Rint = 0.0409, Rsigma = 0.0141]                                  |
| Data/restraints/parameters                       | 5302/226/328                                                           |
| Goodness-of-fit on F <sup>2</sup>                | 1.109                                                                  |
| Final R indexes [ $I > 2\sigma(I)$ ]             | R1 = 0.0330, wR2 = 0.0763                                              |
| Final R indexes [all data]                       | R1 = 0.0374, wR2 = 0.0781                                              |
| Largest diff. peak/hole / e $\text{\AA}^{-3}$    | 1.15/-0.43                                                             |

---

**Table S5.** Solvent mask information for **5d**

| Number | X      | Y      | Z      | Volume | Electron count |
|--------|--------|--------|--------|--------|----------------|
| 1      | -0.118 | 0.038  | 0.220  | 58.6   | 17.3           |
| 2      | 0.118  | -0.038 | 0.780  | 58.6   | 16.4           |
| 3      | -0.118 | 0.462  | 0.720  | 58.6   | 16.4           |
| 4      | 0.118  | 0.538  | 0.280  | 58.6   | 17.4           |
| 5      | 0.250  | 0.250  | 0.490  | 66.6   | 17.0           |
| 6      | 0.250  | 0.250  | -0.010 | 66.6   | 17.9           |
| 7      | 0.382  | 0.538  | 0.780  | 58.6   | 17.1           |
| 8      | 0.382  | 0.962  | 0.280  | 58.6   | 16.6           |
| 9      | 0.618  | 0.038  | 0.720  | 58.6   | 17.2           |
| 10     | 0.618  | 0.462  | 0.220  | 58.6   | 16.7           |
| 11     | 0.750  | 0.750  | 0.510  | 66.6   | 17.8           |
| 12     | 0.750  | 0.750  | 0.010  | 66.6   | 17.0           |

### S.3 Buried volume calculations

Buried volume calculations were carried out using the SambVca 2.1 Software.<sup>S12</sup> The calculations were performed using the following parameters: Bond radii scaled by 1.17x; Sphere radius of 3.5; Distance of the coordination point from the center of the sphere 0.0; Mesh spacing for numerical integration 0.10; H atoms were not included in the calculations.

Complex **5b**:

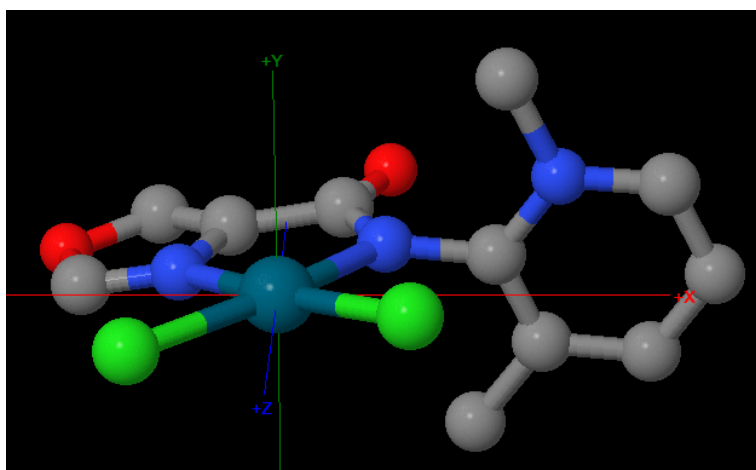

| %V Free | %V Buried | % V Tot/V Ex |
|---------|-----------|--------------|
| 61.4    | 38.6      | 99.9         |

| Quadrant | V f  | V b  | V t  | %V f | %V b |
|----------|------|------|------|------|------|
| SW       | 27.6 | 17.2 | 44.9 | 61.6 | 38.4 |
| NW       | 32.3 | 12.6 | 44.9 | 71.9 | 28.1 |
| NE       | 24.4 | 20.4 | 44.9 | 54.5 | 45.5 |
| SE       | 25.8 | 19.1 | 44.9 | 57.5 | 42.5 |

Steric Map

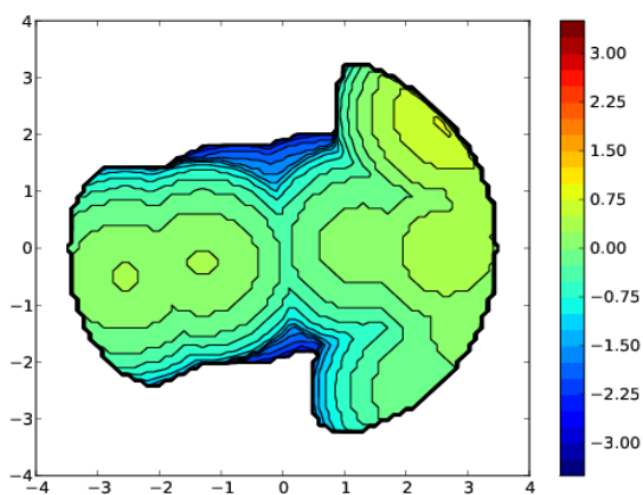

Complex 5d:

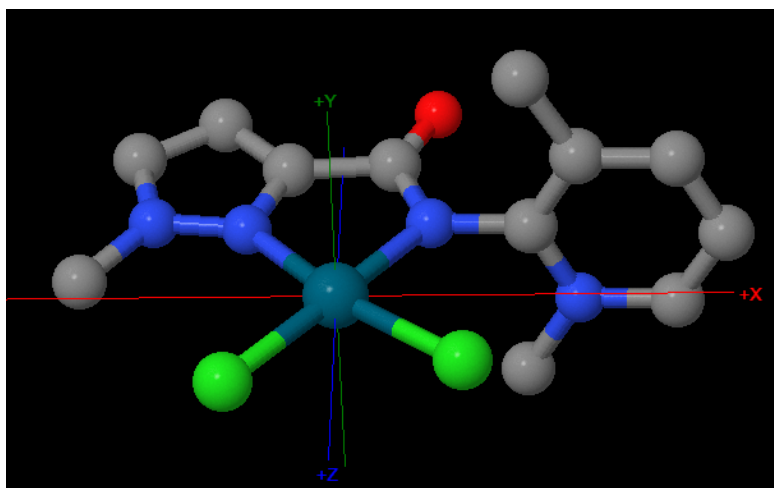

| %V Free | %V Buried | % V Tot/V Ex |
|---------|-----------|--------------|
| 59.4    | 40.6      | 99.9         |

| Quadrant | V f  | V b  | V t  | %V f | %V b |
|----------|------|------|------|------|------|
| SW       | 27.8 | 17.0 | 44.9 | 62.1 | 37.9 |
| NW       | 30.1 | 14.8 | 44.9 | 67.1 | 32.9 |
| NE       | 24.8 | 20.1 | 44.9 | 55.2 | 44.8 |
| SE       | 23.9 | 21.0 | 44.9 | 53.3 | 46.7 |

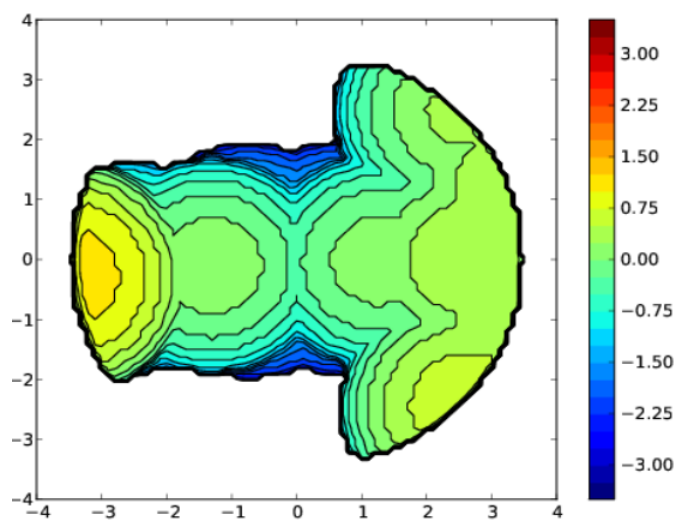

Complex 5f:

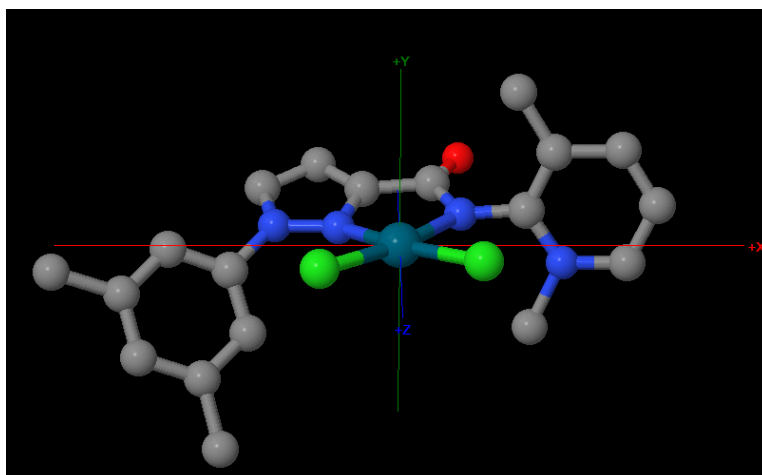

| %V Free | %V Buried | % V Tot/V Ex |
|---------|-----------|--------------|
| 57.7    | 42.3      | 99.9         |

| Quadrant | V f  | V b  | V t  | %V f | %V b |
|----------|------|------|------|------|------|
| SW       | 21.8 | 23.0 | 44.9 | 48.7 | 51.3 |
| NW       | 32.6 | 12.3 | 44.9 | 72.6 | 27.4 |
| NE       | 26.6 | 18.3 | 44.9 | 59.3 | 40.7 |
| SE       | 22.6 | 22.2 | 44.9 | 50.4 | 49.6 |

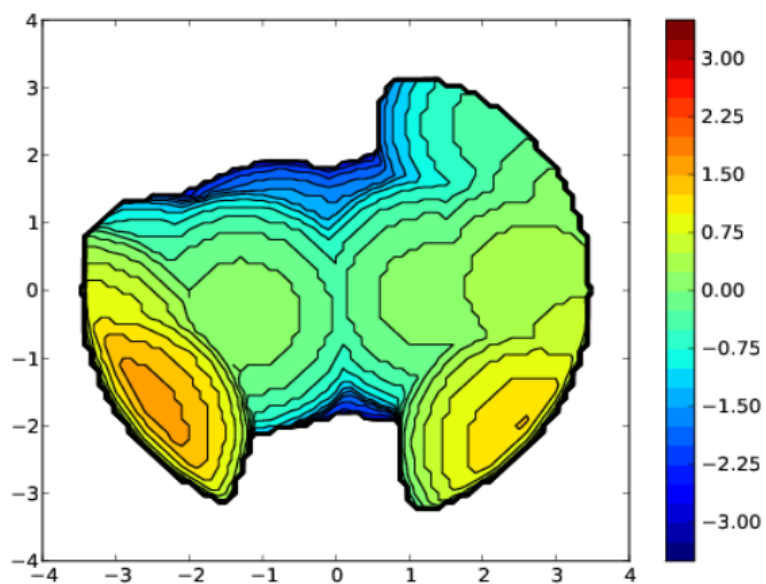

Complex 5g:

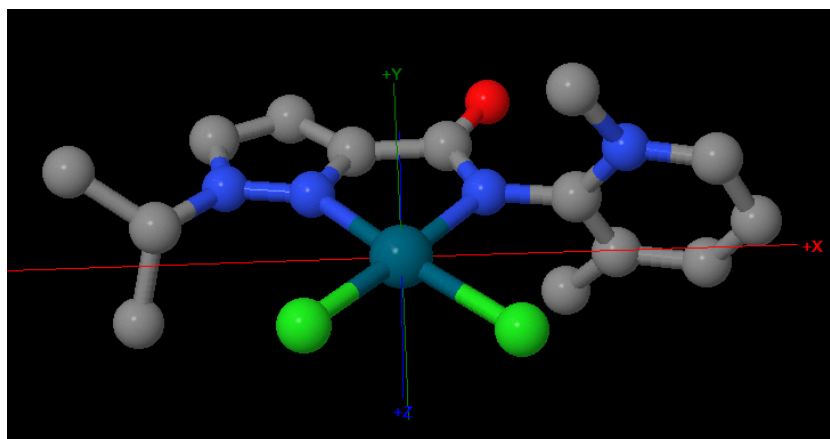

| %V Free | %V Buried | % V Tot/V Ex |
|---------|-----------|--------------|
| 57.7    | 42.3      | 99.9         |

| Quadrant | V f  | V b  | V t  | %V f | %V b |
|----------|------|------|------|------|------|
| SW       | 27.8 | 17.0 | 44.9 | 62.0 | 38.0 |
| NW       | 28.1 | 16.8 | 44.9 | 62.5 | 37.5 |
| NE       | 21.9 | 23.0 | 44.9 | 48.7 | 51.3 |
| SE       | 25.8 | 19.0 | 44.9 | 57.6 | 42.4 |

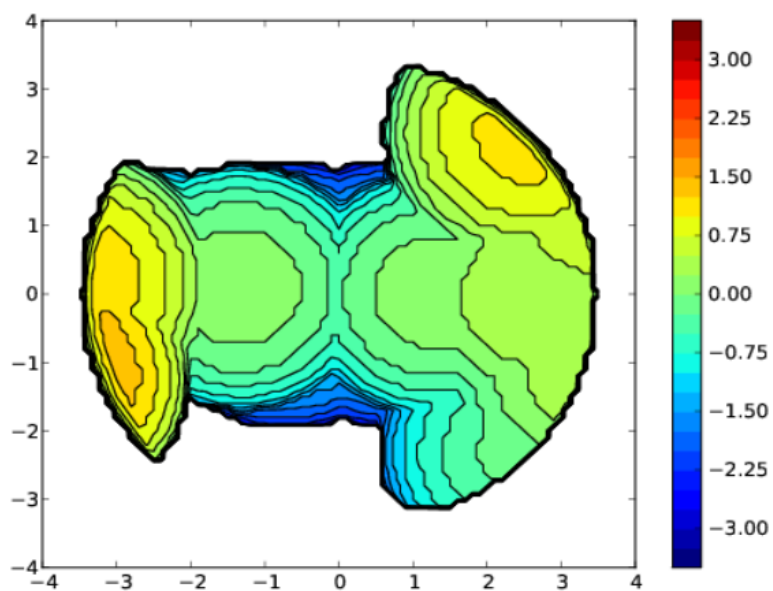

## S.4 Catalytic procedures

### S.4.1 General procedure for propiophenone $\alpha$ -arylation

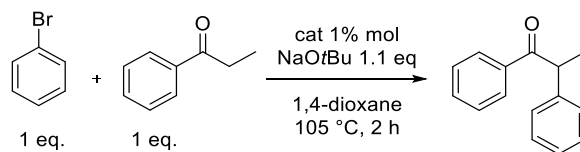

**Scheme S6:** General reaction conditions.

Complex **5a-5g** (0.01 mmol), hexamethylbenzene (0.2 mmol) and NaOtBu (1.1 mmol) were placed in a 10 mL vial. The vial was closed, evacuated and backfilled with N<sub>2</sub> three times. 1,4-dioxane (1 mL), propiophenone (1 mmol) and bromobenzene (1 mmol) were added. A sample was taken (time = 0) and the reaction mixture was heated to 105 °C. After 30 seconds, the reaction time was set to zero to account for the heating of the sample. Samples were taken after one and two hours, diluted in 1,4-dioxane, filtered over celite and analyzed by GC-FID.

### S.4.2 Procedure for the acquisition of time-conversion profiles and TOF<sub>max</sub> determination

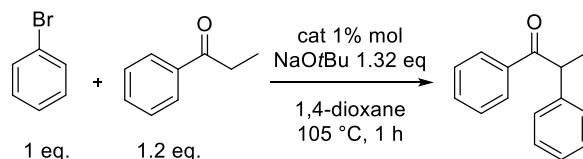

**Scheme S7:** General method for the kinetic profiling.

Complex **5a-5g** (0.01 mmol) were placed in a conical 5 mL vial that was closed, evacuated and backfilled with N<sub>2</sub> three times. Dry 1,4-dioxane (2 mL) and propiophenone (1.2 mmol) were added. In a second, normal shaped 10 mL vial, NaOtBu (1.32 mmol) and the internal standard hexamethylbenzene (0.2 mmol) were weighted in and the vial was closed, evacuated and backfilled with N<sub>2</sub> three times. Dry 1,4-dioxane (2 mL) and bromobenzene (1 mmol) were added. Both solutions were pre-heated to 105 °C. From the aryl halide solution, the time zero sample was taken and diluted in a GC-vial in 1,4-dioxane. The complex solution was then transferred to the aryl halide solution via cannula to start the reaction. Aliquots were taken after given times, diluted in 1,4-dioxane, filtered over celite and analyzed by GC-FID.

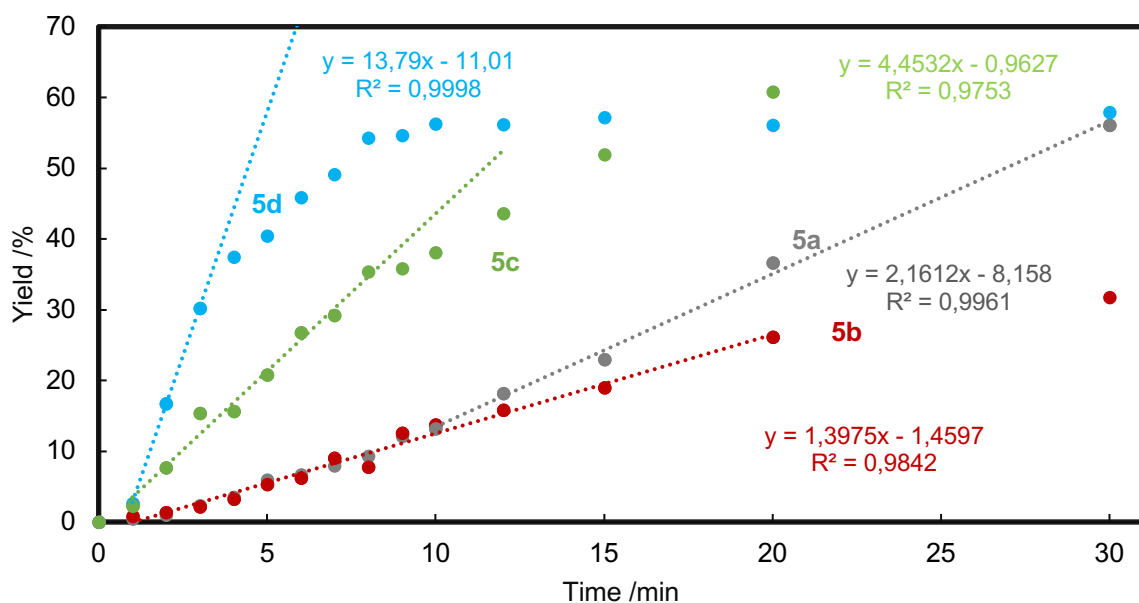

**Figure S63:** Time-conversion profile for the propiophenone  $\alpha$ -arylation catalyzed by Pd complexes **5a-5d**. The linear regime considered for  $\text{TOF}_{\text{max}}$  evaluation is highlighted by the dotted lines for each catalyst. Slopes derived from these trendlines have been used for  $\text{TOF}_{\text{max}}$  calculation. Reaction conditions: PhBr (1.0 mmol), Propiophenone (1.2 mmol), [Pd] (0.01 mmol), NaOtBu (1.32 mmol), 1,4-dioxane (2.0 mL) in a 10 mL vial, 105 °C under  $\text{N}_2$ , constant sampling was performed, yield determined by GC analysis using hexamethylbenzene as internal standard. All the experiments were run at least in duplicate.

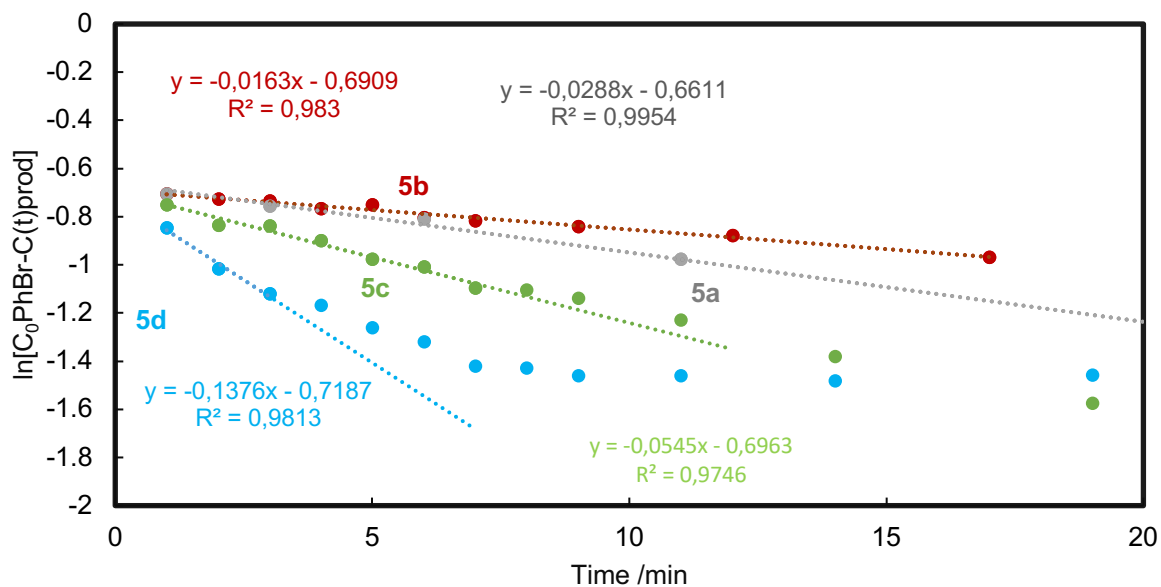

**Figure S64:** Linear regression analysis for the determination of the initial rate constant  $k_{\text{ini}}$  for the propiophenone  $\alpha$ -arylation catalyzed by Pd complexes **5a-5d**. To mitigate mixing effects in the first minute of the reaction the conversion happening during the first minute of the reaction was not considered for catalyst activity analysis. Only points included in the linear regime at the maximal TOF were considered to calculate the slopes. Reaction conditions: PhBr (1.0 mmol), Propiophenone (1.2 mmol), [Pd] (0.01 mmol), NaOtBu (1.32 mmol), 1,4-dioxane (2.0 mL) in a 10 mL vial, 105 °C under  $\text{N}_2$ , sampling as indicated in the graph, yield determined by GC analysis using hexamethylbenzene as internal standard.

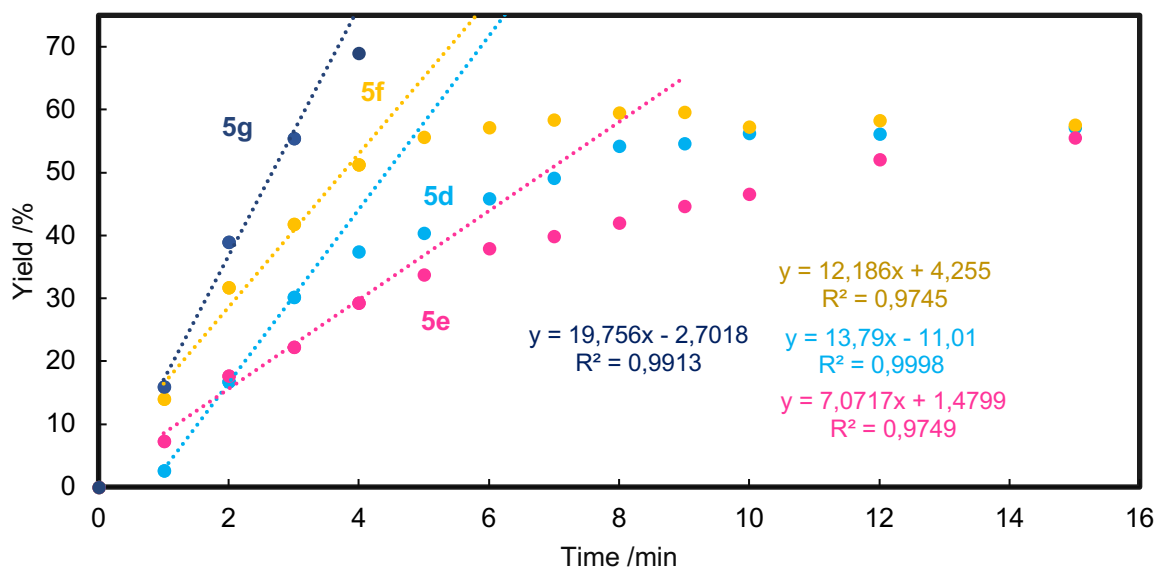

**Figure S65:** Time-conversion profile for propiophenone  $\alpha$ -arylation catalyzed by Pd complexes **5d–5g**. The linear regime considered for  $\text{TOF}_{\text{max}}$  evaluation is highlighted by the dotted lines for each catalyst. Slopes derived from these trendlines have been used for  $\text{TOF}_{\text{max}}$  calculation. Reaction conditions: PhBr (1.0 mmol), Propiophenone (1.2 mmol), [Pd] (0.01 mmol), NaOtBu (1.32 mmol), 1,4-dioxane (2.0 mL) in a 10 mL vial, 105 °C under  $\text{N}_2$ , constant sampling was performed, yields determined by GC analysis using hexamethylbenzene as internal standard. All experiments run at least in duplicate.

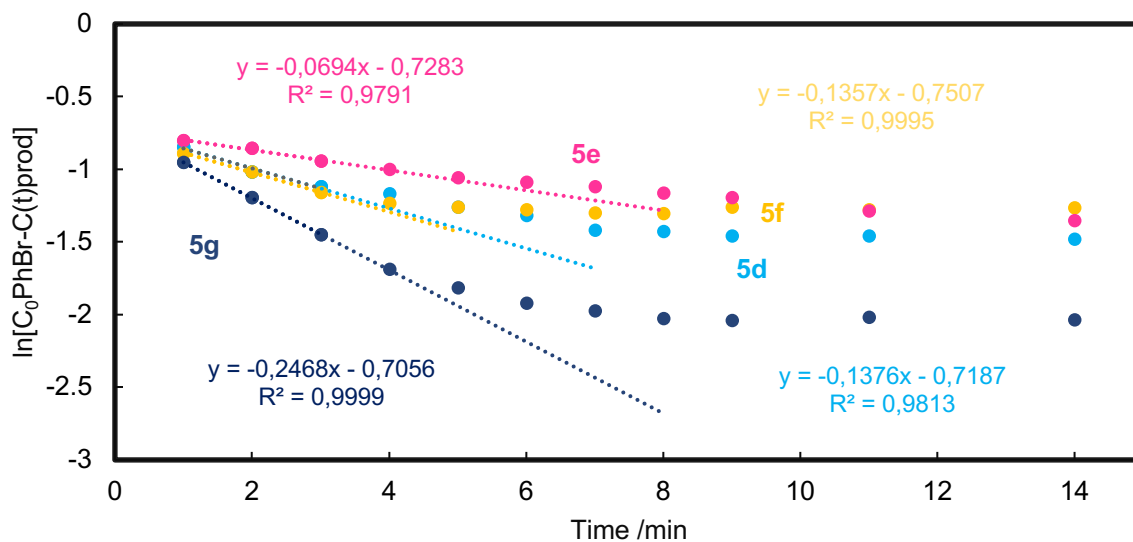

**Figure S66:** Linear regression analysis for the determination of the initial rate constant  $k_{\text{ini}}$  for the propiophenone  $\alpha$ -arylation catalyzed by Pd complexes **5d–5g**. To mitigate mixing effects in the first minute of the reaction the conversion taking place during the first minute of the reaction was not considered for catalyst activity analysis. Only points included in the linear regime at the maximal TOF were considered to calculate the slopes. Reaction conditions: PhBr (1.0 mmol), Propiophenone (1.2 mmol), [Pd] (0.01 mmol), NaOtBu (1.32 mmol), 1,4-dioxane (2.0 mL) in a 10 mL vial, 105 °C under  $\text{N}_2$ , constant sampling was performed, yield determined by GC analysis using hexamethylbenzene as internal standard.



### S.4.3 General procedure for determining the order in palladium complex

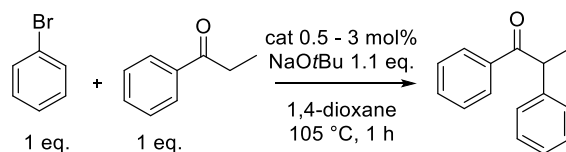

**Scheme S8:** General method for catalyst order determination.

Complex **5a** and **5d** (0.01 mmol), hexamethylbenzene (0.2 mmol) and NaOtBu (1.1 mmol) were placed in a 10 mL vial and evacuated and backfilled with N<sub>2</sub>. Dry 1,4-dioxane (2 mL), propiophenone (1 mmol) and bromobenzene (1 mmol) were added. A sample was taken (time = 0) and the reaction mixture was heated to 105 °C. After 30 seconds, the reaction time was set to zero to account for the heating of the sample. Aliquots were taken after given times, diluted in 1,4-dioxane, filtered over celite and analyzed with GC-FID. The reaction was repeated under exactly the same conditions at different catalyst loadings from 0.5 mol% to 3 mol% for **5d** and 0.5 mol% to 2 mol% for complex **5a**.

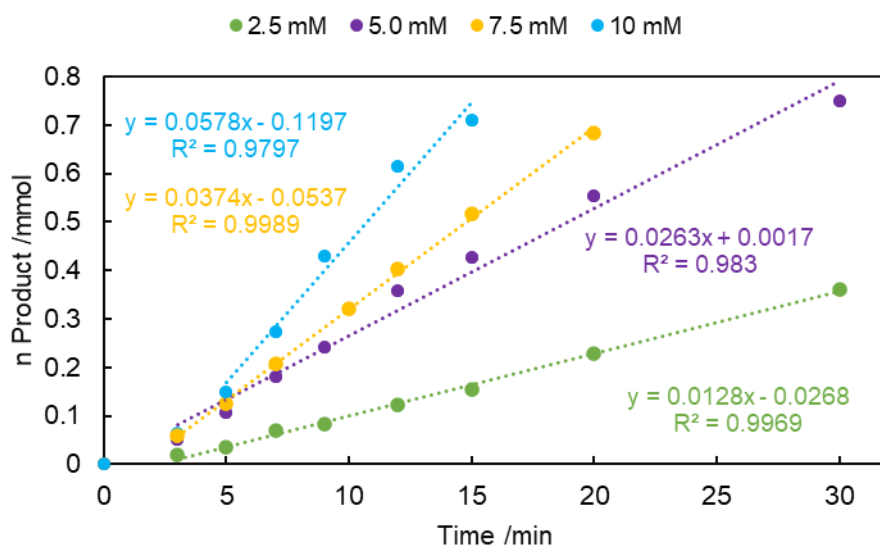

**Figure S67:** Time-conversion profile at different **5a** catalyst loadings in the linear regime, conditions see above.

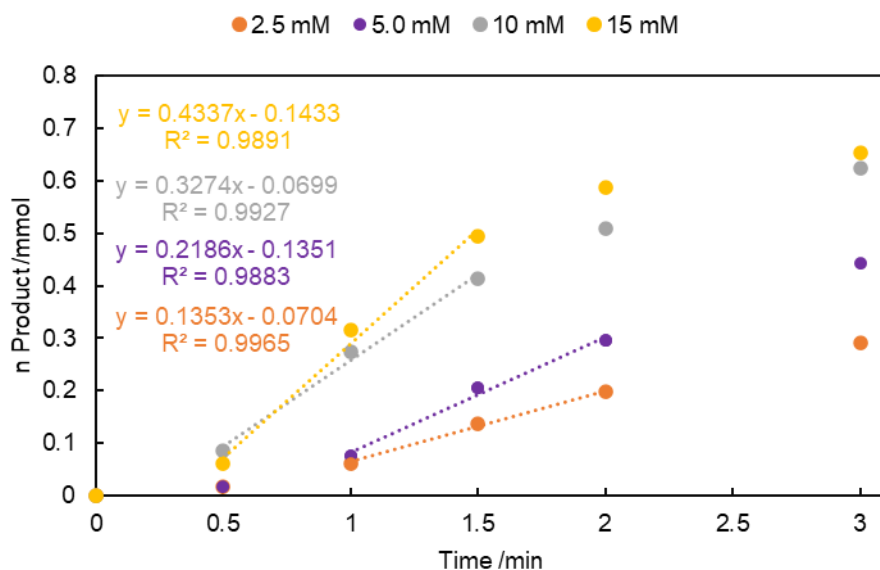

**Figure S68:** Time-conversion profile at different **5d** catalyst loadings in the linear regime, conditions see above.

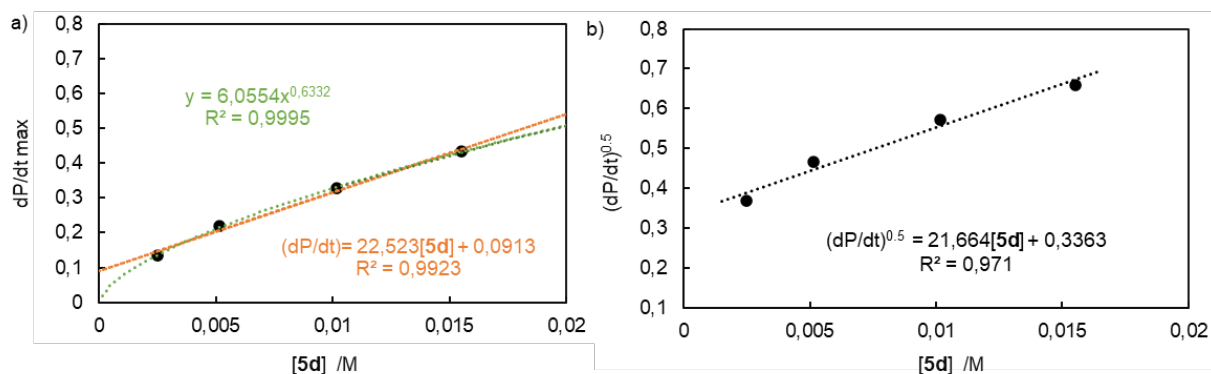

**Figure S69:** Determination of the catalytic rate order in **5d**. a) Evaluation of a 1<sup>st</sup> order rate dependency in **5d**. In orange the linear regression plot, in green the best power fit giving a catalyst rate order of 0,63. b) Linear plot for a half-order dependence in **5d** and the associated linear plot. Given the broken order calculated from the polynomial fit (in green) and the value obtain for the y-intercept, the possibility of a half-order dependence in **5d** was also explored through variable time normalization analysis (VTNA)<sup>S13</sup> kinetic studies (Fig. S70–S73) and a log-log plots (Fig. S74). While both the 1<sup>st</sup> order and ½ order models equally fit the data, no additional evidence supporting a half-order behavior in **5d** was found. Therefore, only the 1<sup>st</sup> order hypothesis was considered in subsequent discussions.

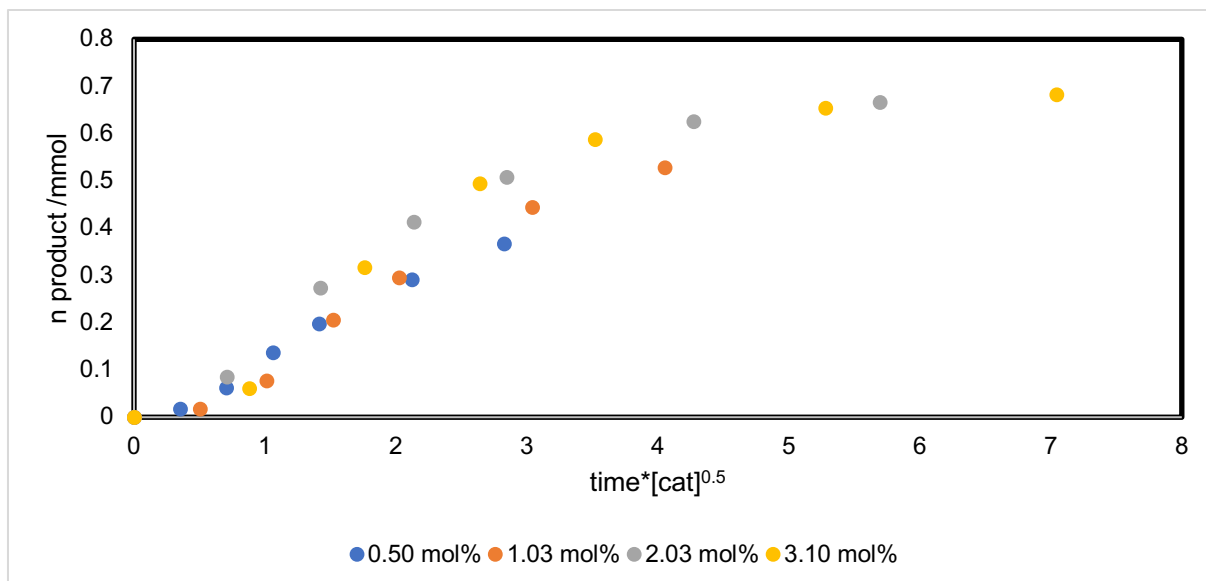

**Figure S70:** Catalyst rate order determination for **5d** using VTNA (ref S13) and assuming a 0.5 order in catalyst.

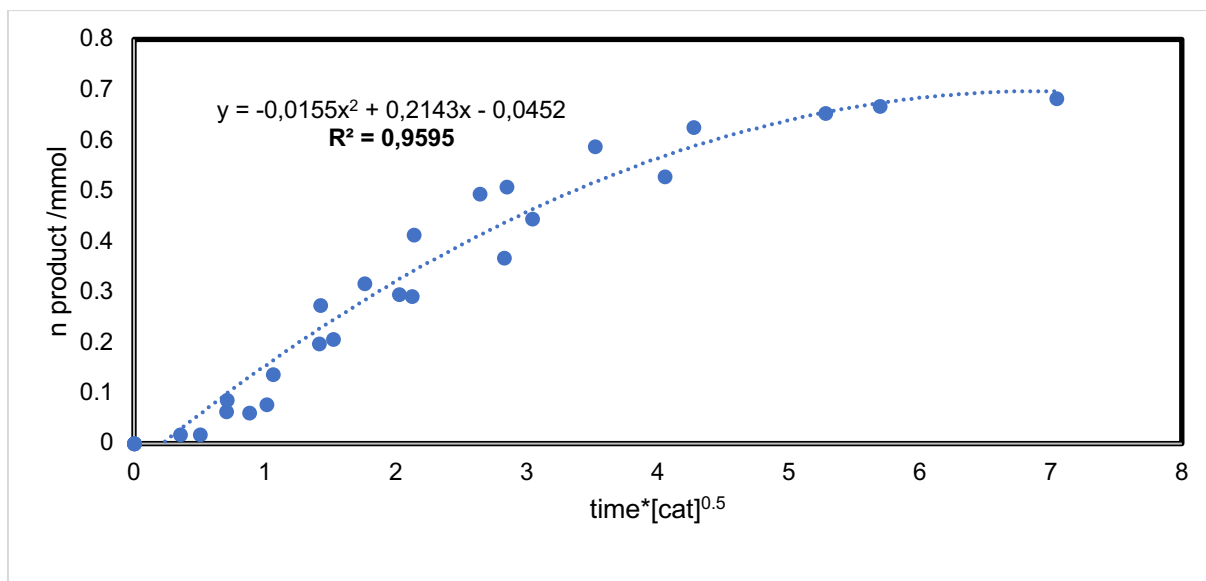

**Figure S71:** Catalyst rate order determination for **5d** using VTNA (ref S13) and assuming a 0.5 order in catalyst, in blue the overall best polynomial fit giving a  $R^2 = 0.9595$ .

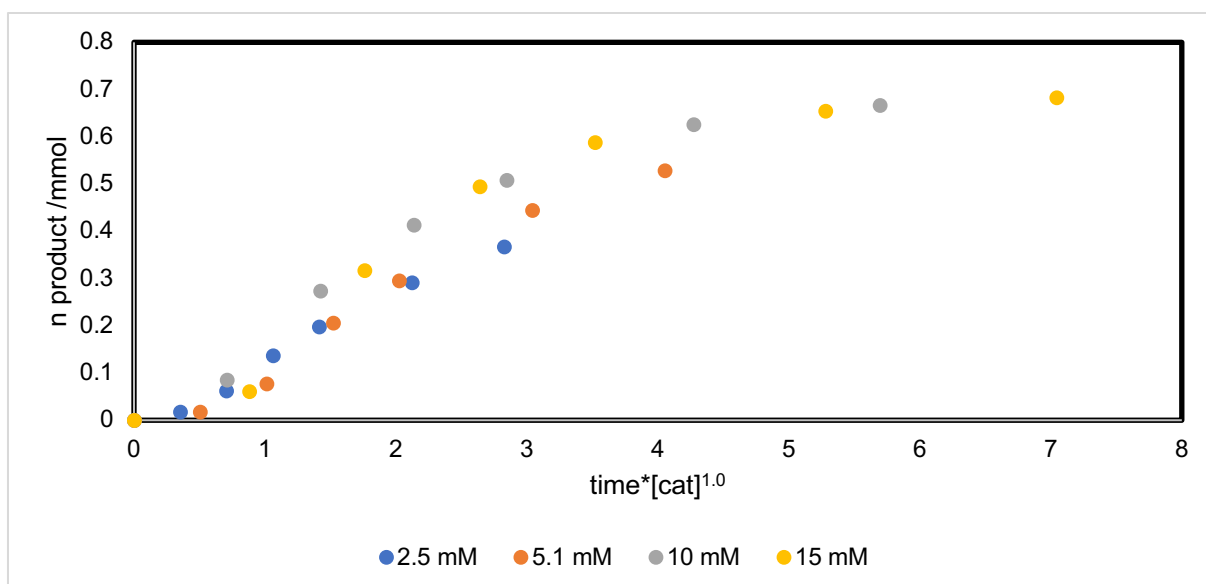

**Figure S72:** Catalyst rate order determination for **5d** using VTNA (ref S13) and assuming 1<sup>st</sup> order in catalyst.

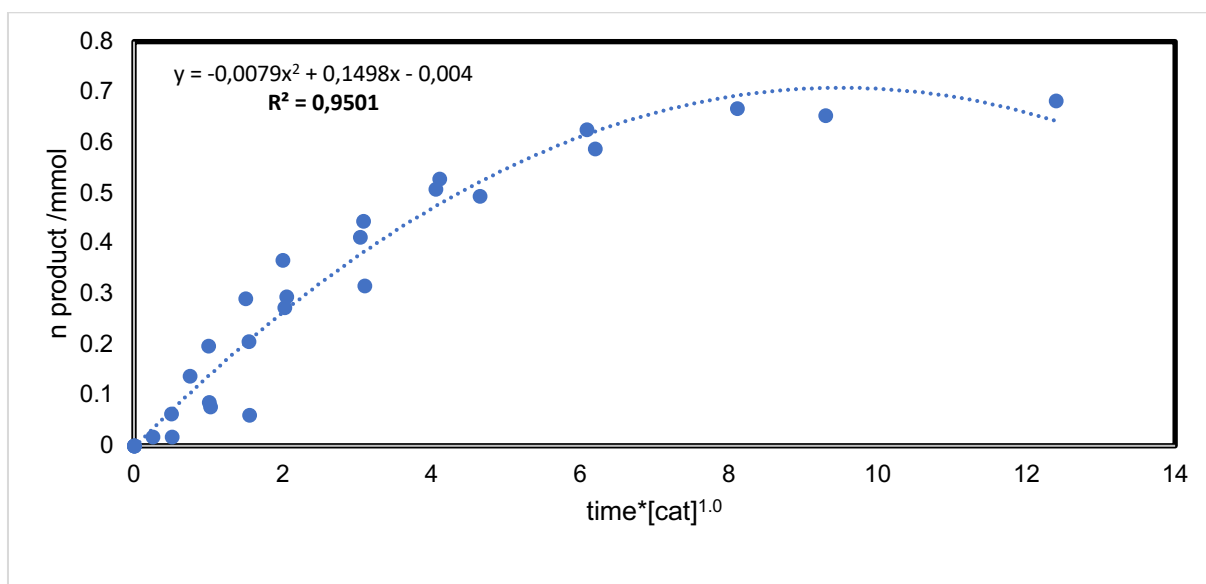

**Figure S73:** Catalyst rate order determination for **5d** using VTNA (ref S13) and 1<sup>st</sup> order in catalyst, in blue the overall best polynomial fit giving a  $R^2 = 0.9501$ .

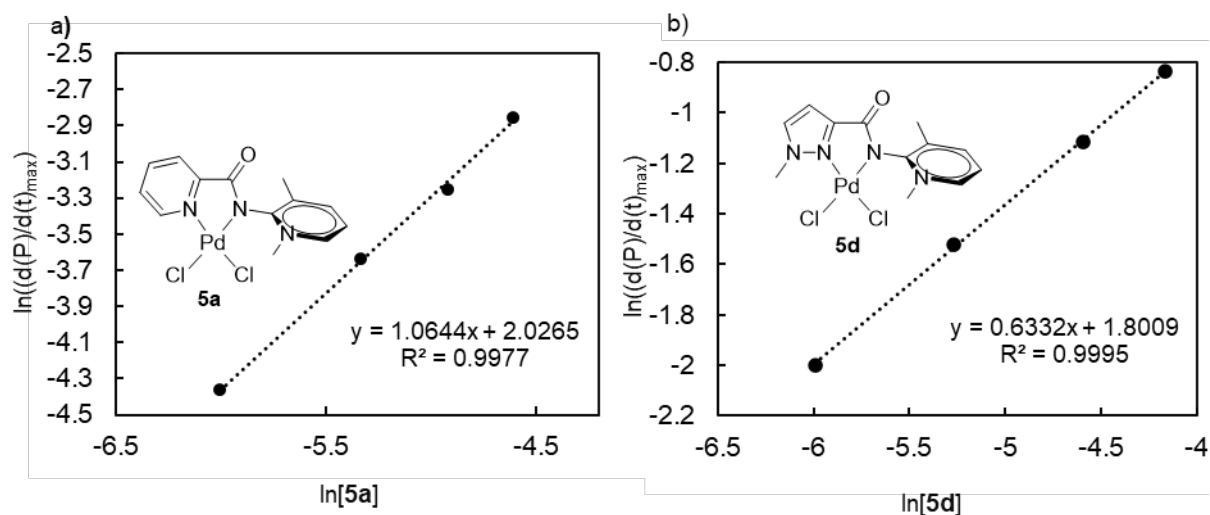

**Figure S74:** Log-log plots for determining the catalyst rate order revealing a) a slope of 1 and first order dependence in [**5a**]; b) a slope of 0.63 and a broken order dependence in [**5d**].

#### S.4.4 Procedure for determining the rate order in substrates

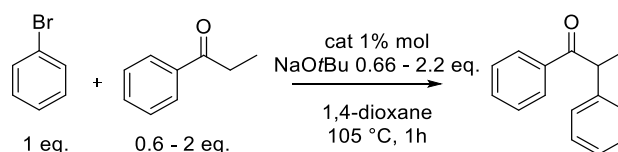

**Scheme S9:** General method for determining the order in propiophenone.

Complex **5d** (0.01 mmol), hexamethylbenzene (0.2 mmol) and NaOtBu (1.1 mmol) were placed in a 10 mL vial and evacuated and backfilled with  $N_2$ . Dry 1,4-dioxane (2 mL), propiophenone (1 mmol) and bromobenzene (1 mmol) were added. A sample was taken (time = 0) and the reaction mixture was heated to 105 °C. After 30 seconds, the reaction time was set to zero to account for the heating of the sample. The reaction was repeated with the same conditions, keeping the amount of bromobenzene constant, but charged with different amounts of propiophenone from 0.6 mmol to 2 mmol and NaOtBu respectively.

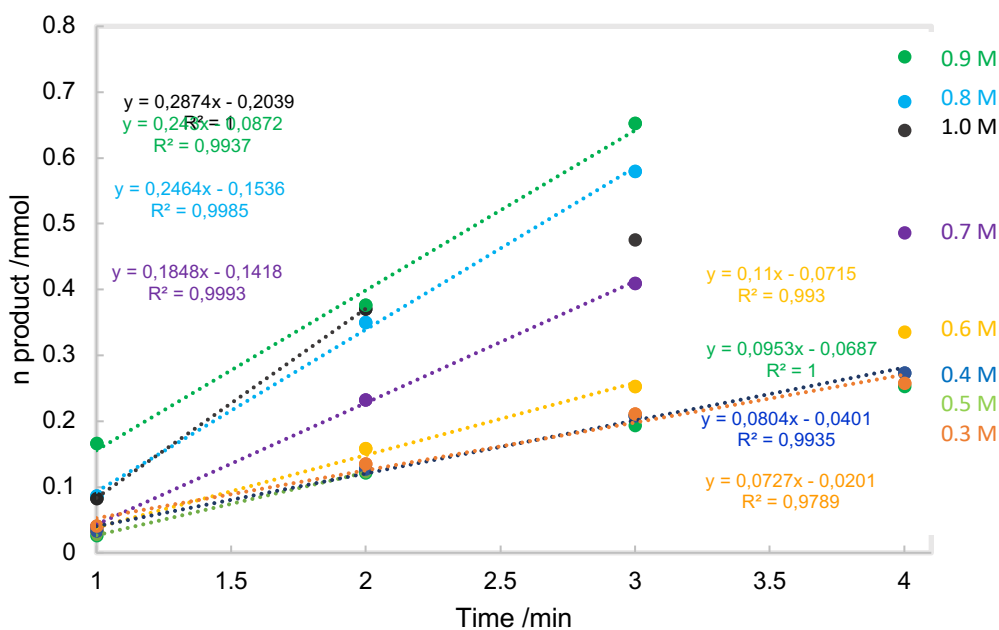

**Figure S75:** Time-conversion profile at different propiophenone concentrations in the linear regime, conditions see above.

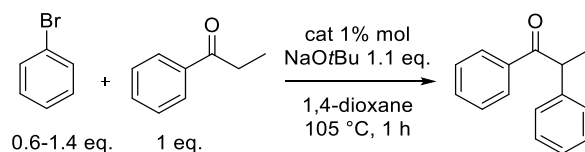

**Scheme S10:** General method for determining the order in bromobenzene.

Complex **5d** (0.01 mmol), hexamethylbenzene (0.2 mmol) and NaOtBu (1.1 mmol) were placed in a 10 mL vial and evacuated and backfilled with N<sub>2</sub>. Dry 1,4-dioxane (2 mL), propiophenone (1 mmol) and bromobenzene (1 mmol) were added. A sample was taken (time = 0) and the reaction mixture was heated to 105 °C. After 30 seconds, the reaction time was set to zero to account for the heating of the sample. Aliquots were taken after given times, diluted in 1,4-dioxane, filtered over celite and analyzed with GC-FID. The reaction was repeated with the same conditions but charged with different amounts of bromobenzene from 0.6 mmol to 1.4 mmol.

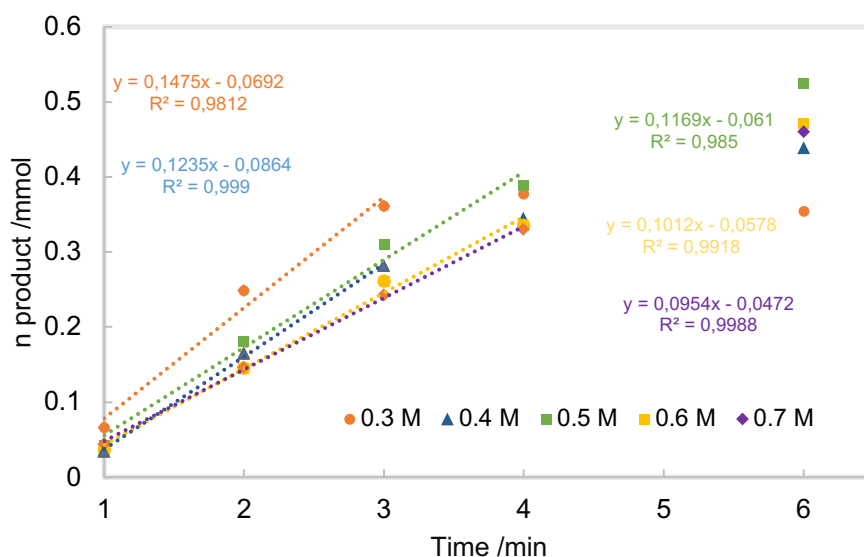

**Figure S76:** Time-conversion profile at different bromobenzene concentrations in the linear regime, conditions see above.

#### S.4.5 Procedures for catalyst poisoning experiments

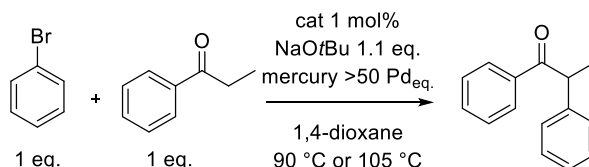

**Scheme S11:** Mercury poisoning test.

Complex **5a** or **5d** (0.01 mmol), hexamethylbenzene (0.2 mmol) and NaOtBu (1.1 mmol) were placed in a 10 mL vial and evacuated and backfilled with N<sub>2</sub>. Dry 1,4-dioxane (2 mL), propiophenone (1 mmol) and bromobenzene (1 mmol) were added. Time 0 sample was taken and the reaction mixture heated (105 °C for **5a**, 90 °C for **5d**). At about 30% conversion (after 12 minutes for **5a**, after 6 min for **5d**), 3 drops of elemental mercury (estimated weight 150 mg, 0,75 mmol) were added to the reaction. Aliquots were taken after given times, diluted in 1,4-dioxane, filtered over celite and analyzed with GC-FID.

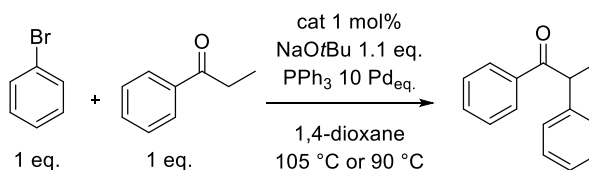

**Scheme S12:** General method for PPh<sub>3</sub> poisoning test.

Same procedure and conditions as used for the mercury poisoning experiment (see S.10.7). Instead of mercury, triphenylphosphine (26.2 mg, 100  $\mu\text{mol}$ ) was added.

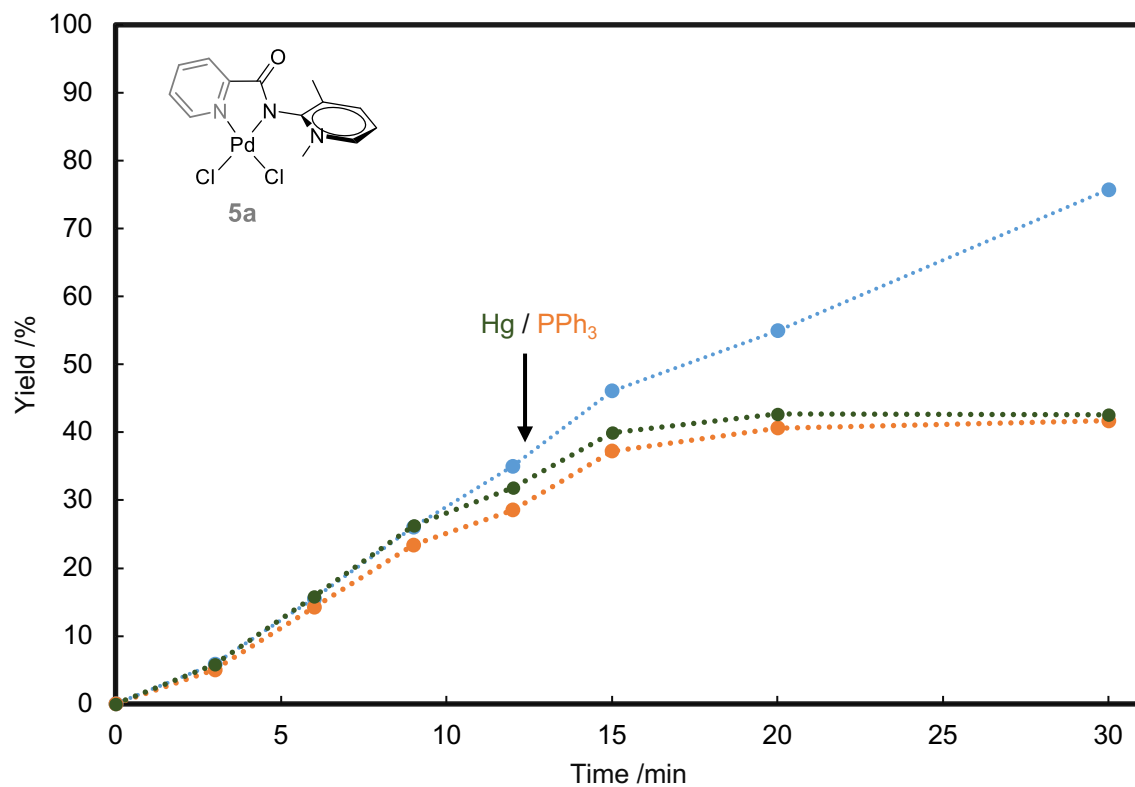

**Figure S77:** Conversion profile of complex **5a** including the normal run (blue), Hg poisoning (green) and PPh<sub>3</sub> poisoning (orange). For experimental details see sections S.10.6 and S.10.7.



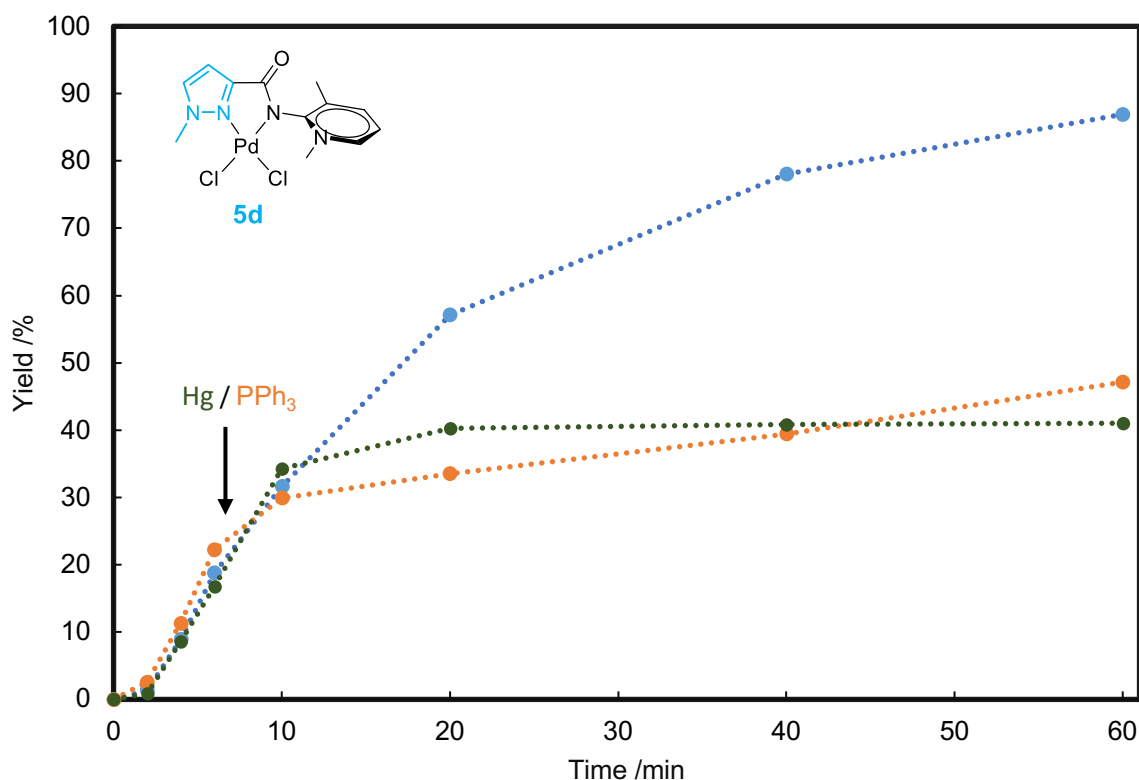

**Figure S78:** Catalytic profile of complex **5d** including the normal run (blue), Hg poisoning (green) and PPh<sub>3</sub> poisoning (orange). For experimental details see sections S.10.6 and S.10.7.

#### S.4.6 General procedure for temperature screening experiments

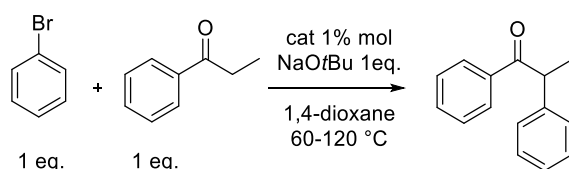

**Scheme S13:** General method for the temperature screening.

Complex **5d** (0.01 mmol), hexamethylbenzene (0.2 mmol) and NaOtBu (1.32 mmol) were placed in a 10 mL vial. The vial was closed, evacuated and backfilled with N<sub>2</sub> three times. 1,4-dioxane (1mL), propiophenone (1 mmol) and bromobenzene (1 mmol) were added. A sample was taken (time = 0) and the reaction mixture was heated to 105 °C. After 30 seconds, the reaction time was set to zero to account for the heating of the sample. Aliquots were taken after given times, diluted in 1,4-dioxane, filtered over celite and analyzed with GC-FID. The reaction was repeated at different temperatures ranging from 60 °C to 120 °C using the same conditions and set-up.

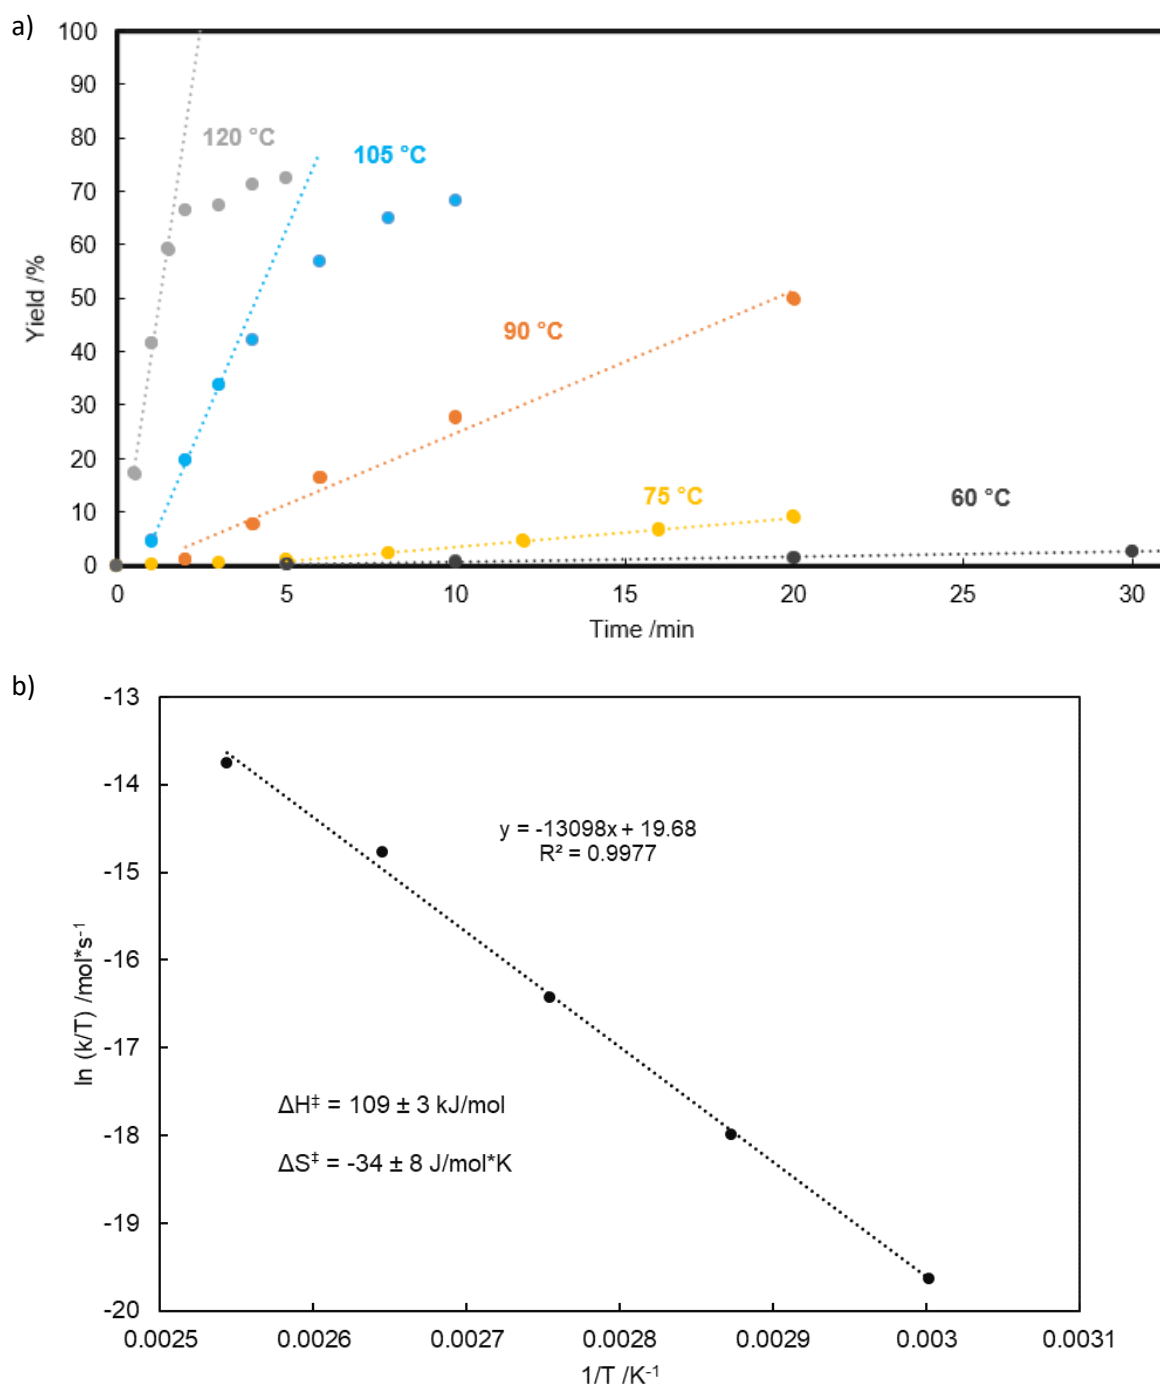

**Figure S79:** a) Time-conversion profile for the coupling of propiophenone and bromobenzene catalyzed by **5d** at different reaction temperatures. Reaction conditions: PhBr (1.0 mmol), Propiophenone (1.0 mmol), [Pd] (0.01 mmol), NaOtBu (1.32 mmol), 1,4-dioxane (1.0 mL) in a 10 mL vial, 60-120 °C under N<sub>2</sub>, constant sampling was performed, yield determined by GC analysis using hexamethylbenzene as internal standard. b) Eyring plot based on the temperature-dependent data.

#### S.4.7 Procedure for evaluating air and moisture tolerance

Same set-up and conditions used as previously described in the general  $\alpha$ -arylation procedure (see S.10.1) were used except that for the reaction under air (complex **5d**), the vial was closed but not evacuated and backfilled with N<sub>2</sub>. Regarding the moisture tolerance experiment, 1,4-dioxane (99.5%) purchased from Carl Roth GmbH and kept under air was used. Additionally, Karl Fischer analysis for the dioxane kept under air revealed 0.3% H<sub>2</sub>O content.

#### S.4.8 Procedure for substrates refilling experiment

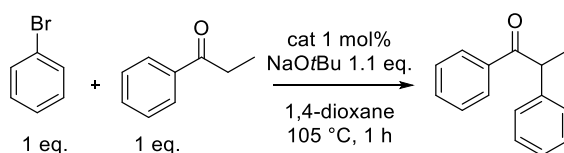

**Scheme S14:** General method for refilling experiment

Complex **5d** (4.12 mg, 0.01 mmol), hexamethylbenzene (32.9 mg, 0.2 mmol) and NaOtBu (106.9 mg, 1.1 mmol) were placed in a 20 mL vial which was evacuated and backfilled with N<sub>2</sub>. Dry 1,4-dioxane (2 mL), propiophenone (1 mmol) and bromobenzene (1 mmol) were added. A sample was taken (time = 0) and the reaction mixture was heated to 105 °C. After 30 seconds, the reaction time was set to zero to account for the heating of the sample. Aliquots were taken after given times, diluted in 1,4-dioxane, filtered over celite, and analyzed with GC-FID. After 30 minutes at 105 °C, 1 mL of a pre-heated stock solution of NaOtBu (530.4 mg, 5.5 mmol) and bromobenzene (5 mmol) in 1,4-dioxane (5 mL) as well as propiophenone (1 mmol) were added to the reaction mixture. Samples were taken after the same reaction times and the whole refilling process was repeated four times.

#### S.4.9 Procedure for catalyst recycling experiments

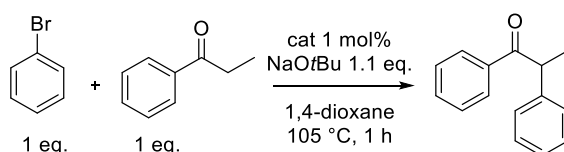

**Scheme S15:** General method for recycling experiment

Complex **5d** (4.09 mg, 0.01 mmol) and NaOtBu (106.7 mg, 1.1 mmol) were placed in a 10 mL vial which was evacuated and backfilled with N<sub>2</sub>. Dry 1,4-dioxane (2 mL), propiophenone (1 mmol) and bromobenzene (1 mmol) were added. The reaction mixture was heated to 105 °C for 30 minutes without sampling. Meanwhile, another vial was charged with hexamethylbenzene (33.2 mg, 0.2 mmol), NaOtBu (106.3 mg, 1.1 mmol), propiophenone (1 mmol) and bromobenzene (1 mmol). After 30 minutes, the reaction mixture was cooled to room temperature and filtered under N<sub>2</sub> or under air into the new vial

through a 0.2  $\mu\text{m}$  syringe filter. A sample was taken (time = 0) and the reaction mixture was heated to 105  $^{\circ}\text{C}$ . After 30 seconds, the reaction time was set to zero to account for the heating of the sample. Aliquots were taken after given times, diluted in 1,4-dioxane, filtered over celite, and analyzed with GC-FID. The experiment was repeated using the same conditions, but the filtration was performed under air (Fig. S80).

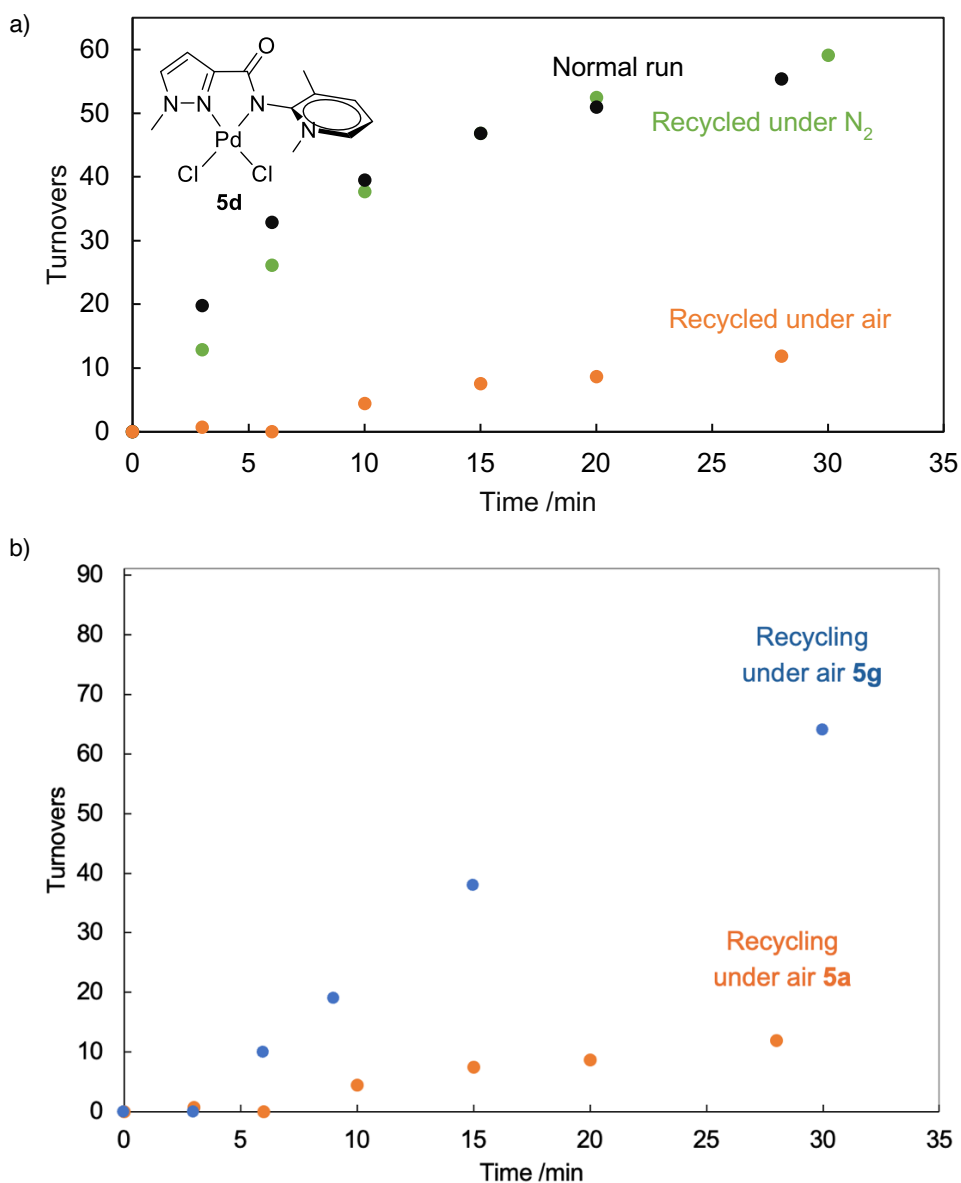

**Figure S80:** a) Catalyst recycling experiment for complex **5d** (black: first run; green: second run after filtration under inert atmosphere; orange: second run after filtration under air); b) recycling experiments comparing second runs after filtration in air for **5d** and **5g**, indicating higher robustness of **5g**.

#### S.4.10 Studies on catalyst activation using 5d

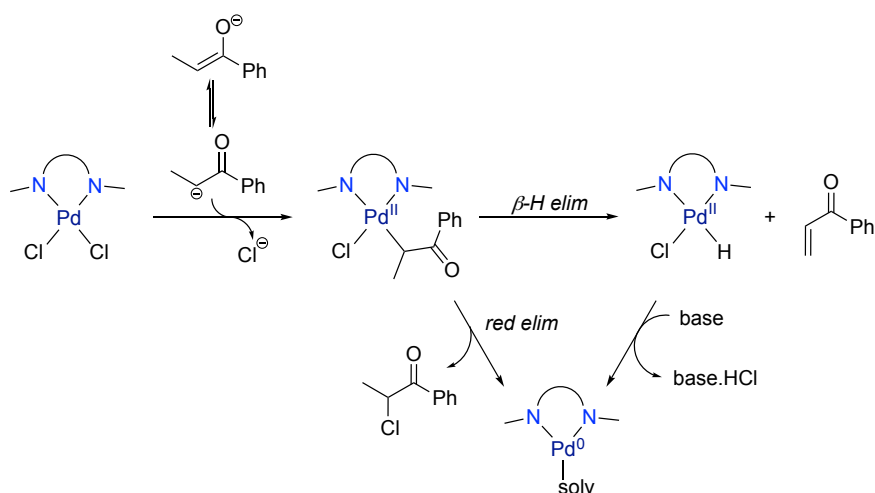

**Figure S81:** Potential pathways for Pd<sup>0</sup> generation from complexes **5** via reductive C–Cl bond elimination or via  $\beta$  hydrogen elimination followed by reductive HCl elimination.

**Procedure for the reactivity study between 5d and NaOtBu:** A J-Young NMR tube charged with complex **5d** (3.1 mg, 7.6  $\mu$ mol) and NaOtBu (1.1 mg, 11.4  $\mu$ mol) was evacuated and backfilled with N<sub>2</sub> three times. The solids were suspended in pre-dried and degassed C<sub>6</sub>D<sub>6</sub> (0.5 mL), sonicated and analyzed by <sup>1</sup>H-NMR spectroscopy. The reaction mixture heated gradually always for 5 minutes at 30 °C, 40 °C, 50 °C, 60 °C, 70 °C, 80 °C and 90 °C and followed by <sup>1</sup>H-NMR spectroscopy.

**Procedure for the reactivity study between 5d and 4-fluoropropiophenone:** A stock solution of durene (20.4 mg, 152  $\mu$ mol) and 4-fluoropropiophenone (10  $\mu$ L, 80  $\mu$ mol) was prepared in pre-dried and degassed C<sub>6</sub>D<sub>6</sub> (5 mL). A J-Young NMR tube was charged with complex **5d** (1.97 mg, 4.8  $\mu$ mol), evacuated and backfilled with N<sub>2</sub> three times. The prepared stock solution (0.2 mL; 3.2  $\mu$ mol 4'-fluoropropiophenone, 6.1  $\mu$ mol durene) and pre-dried and degassed C<sub>6</sub>D (0.3 mL) were added and the reaction mixture was briefly sonicated. <sup>1</sup>H and <sup>19</sup>F{<sup>1</sup>H}-NMR spectrum were recorded after 10 minutes at room temperature then the reaction mixture was gradually heated to 100°C to evaluate the thermal stability.

**Procedure for the reactivity study between 5d, 4-fluoropropiophenone and NaOtBu:** A J-Young NMR tube was charged with complex **5d** (2.2 mg, 5.4  $\mu$ mol) and NaOtBu (4.5 mg, 46.8  $\mu$ mol) and evacuated and backfilled with N<sub>2</sub> three times. The previously described 4-fluoropropiophenone stock solution (0.2 mL -> 3.2  $\mu$ mol 4'-fluoropropiophenone, 6.1  $\mu$ mol durene) and pre-dried and degassed benzene-d<sub>6</sub> (0.3 mL) were added to the tube. The initially yellowish solution was analyzed by <sup>1</sup>H and <sup>19</sup>F{<sup>1</sup>H}-NMR spectroscopy after 10 minutes, 60 minutes, 120 minutes and 24 hours at 23°C. After 10 minutes a colour change from yellowish to orange was observed together with the formation of an orange precipitate. Over time the reaction mixture slowly turned black.

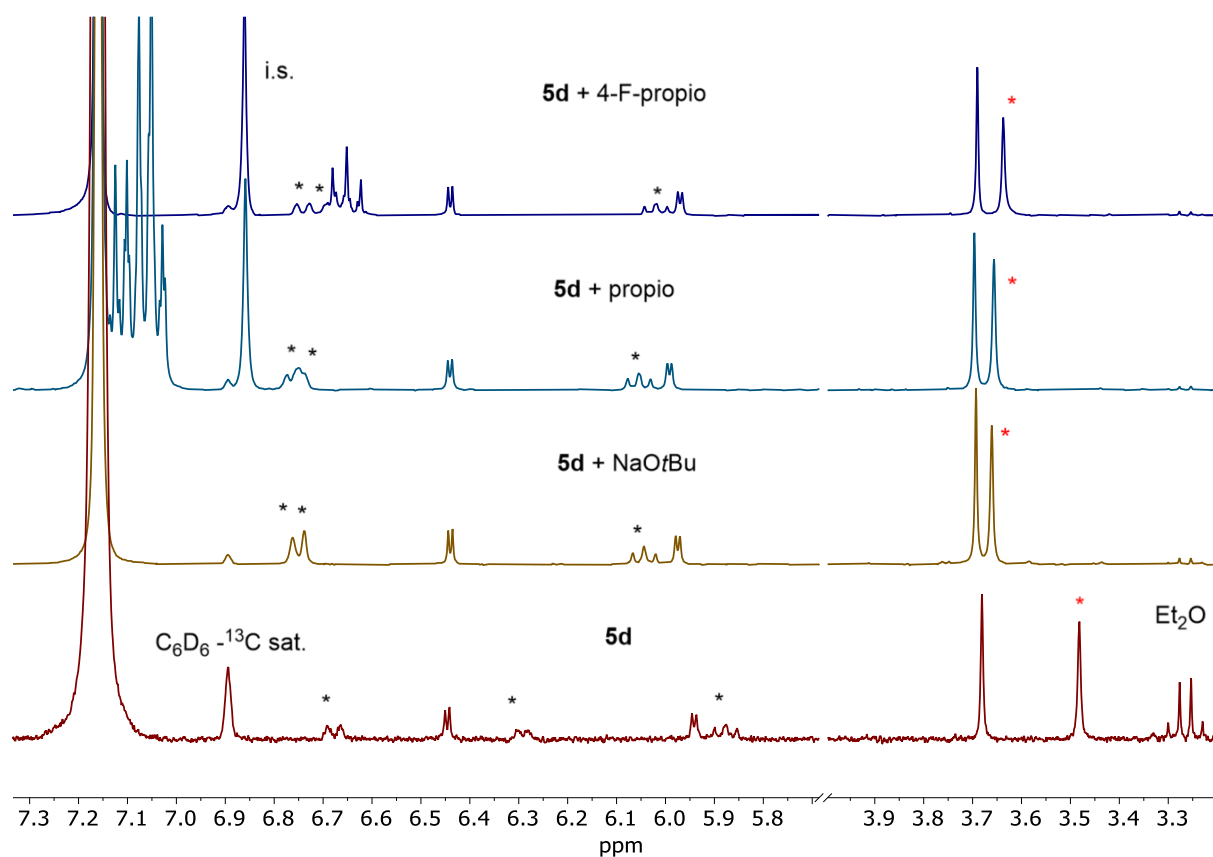

**Figure S82:** Stacked  $^1\text{H}$  NMR spectra ( $\text{C}_6\text{D}_6$ , 298 K, 300 MHz) of from bottom to top: saturated suspension of **5d**, a mixture of **5d** (7.6  $\mu\text{mol}$ ) and  $\text{NaOtBu}$  (11.4  $\mu\text{mol}$ ), a mixture of **5d** (6.8  $\mu\text{mol}$ ), durene (380  $\mu\text{mol}$ ) and propiophenone (1.6 mmol), a mixture of **5d** (4.8  $\mu\text{mol}$ ), durene (152  $\mu\text{mol}$ ) and 4-fluoro-propiophenone (80  $\mu\text{mol}$ ). Black stars are used to highlight the aromatic proton resonances of the PYA ligand, red stars are used to highlight the  $\text{N-CH}_3$  resonance of the PYA ligand. The signal of the residual  $\text{Et}_2\text{O}$  from the synthesis was used as an indicator for the drastic solubility increase of the complex in the presence of either a base or a ketone.

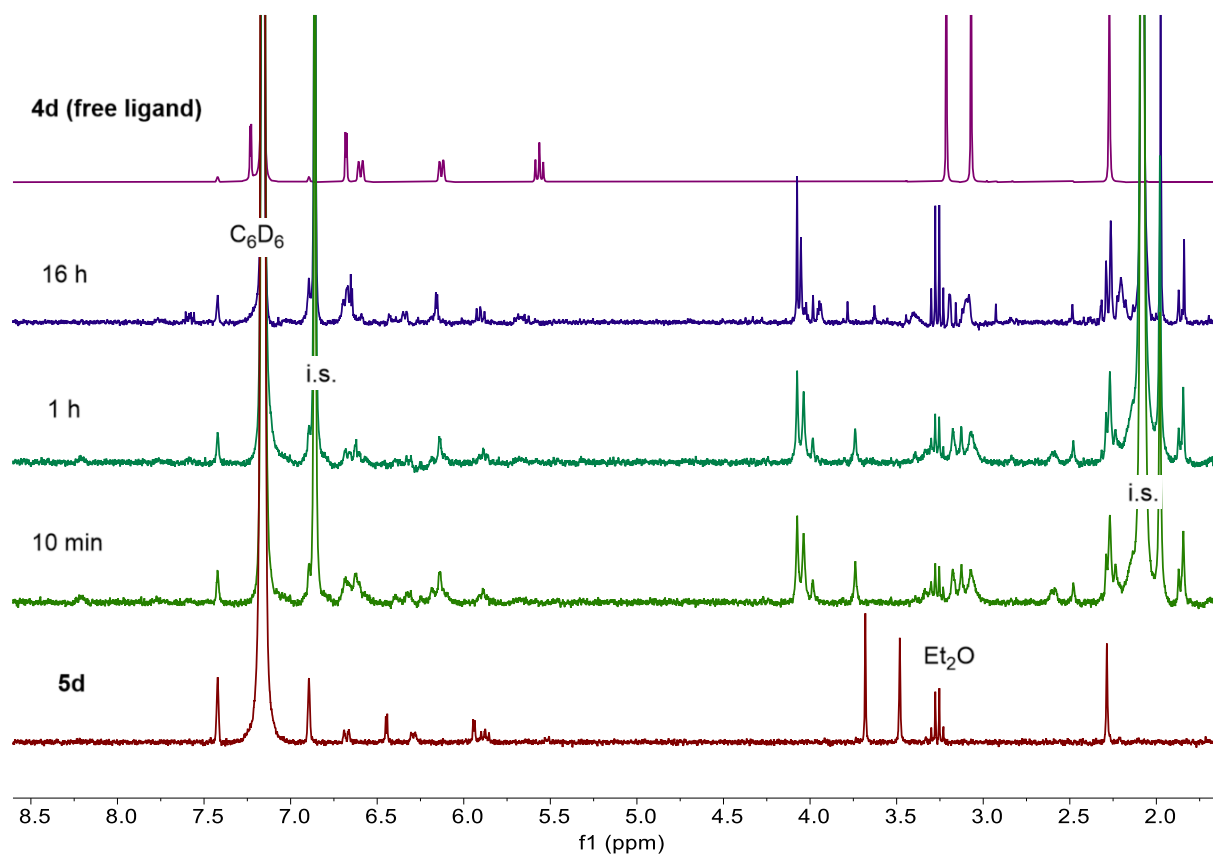

**Figure S83:** Stacked  $^1\text{H}$  NMR spectra ( $\text{C}_6\text{D}_6$ , 298 K, 300 MHz) of from bottom to top: saturated suspension of **5d**, a mixture of **5d** ( $5.4 \mu\text{mol}$ ) +  $\text{NaOtBu}$  ( $47 \mu\text{mol}$ ) + durene  $6.1 \mu\text{mol}$  and 4-fluoropropiophenone  $3.2 \mu\text{mol}$  after 10 min at  $23^\circ\text{C}$ , the same reaction mixture after 1 h at  $23^\circ\text{C}$ , the same reaction mixture after 16 h at  $23^\circ\text{C}$ , the free ligand **4d** for comparison. Ketone conversion was monitored via comparison with the internal standard and revealed  $> 90\%$  conv. No more accurate assessment can be made due to the poor shimming.

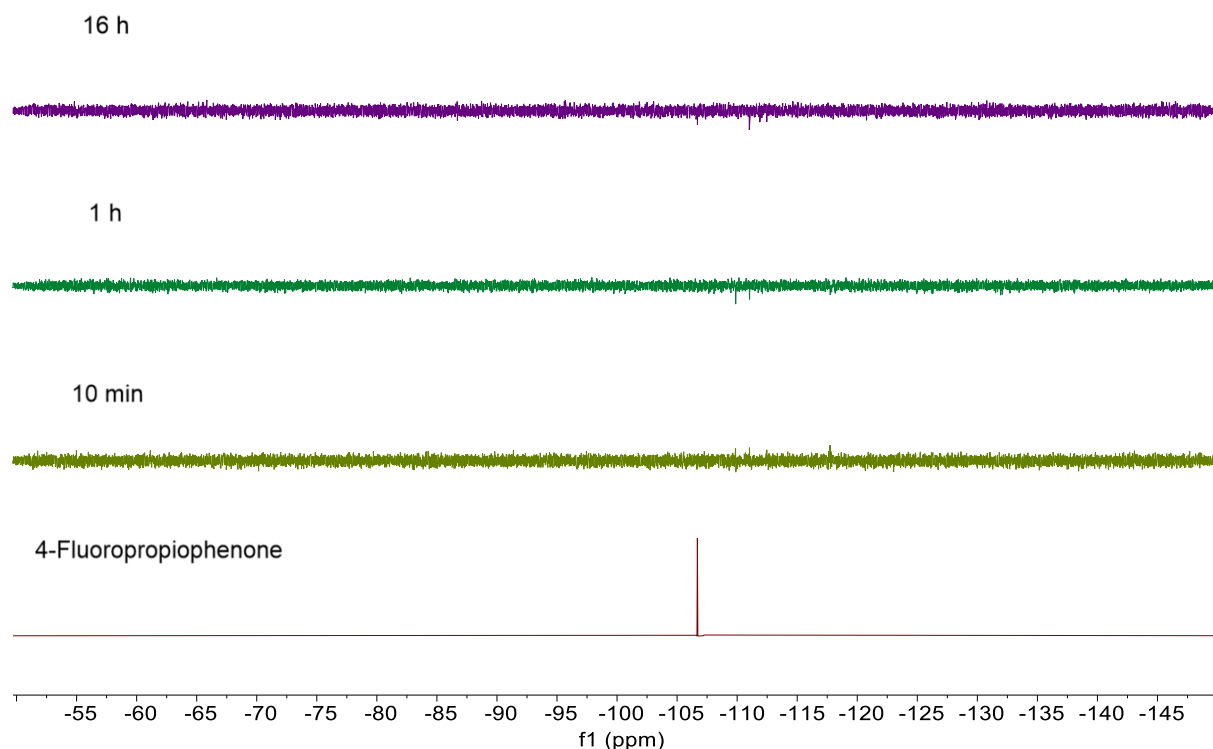

**Figure S84:** Stacked  $^{19}\text{F}$  NMR spectra ( $\text{C}_6\text{D}_6$ , 298 K, 282 MHz) of from bottom to top: the 4-fluoropropiophenone stock solution, a mixture of **5d** ( $5.4\ \mu\text{mol}$ ) + NaOtBu ( $47\ \mu\text{mol}$ ) + durene ( $6.1\ \mu\text{mol}$ ) and 4-fluoropropiophenone ( $3.2\ \mu\text{mol}$ ) after 10 min at  $23\ ^\circ\text{C}$ , the same reaction mixture after 1 h at  $23\ ^\circ\text{C}$ , the same reaction mixture after 16 h at  $23\ ^\circ\text{C}$ .

#### S.4.11 General procedure for aryl chloride activation and competitive C–Br vs C–Cl conversion

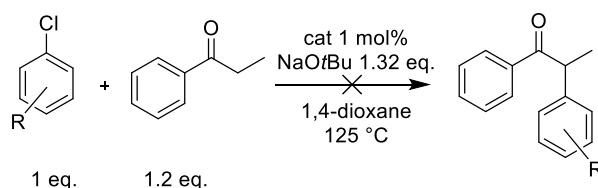

**Scheme S16:** General method for reaction of *o*-trifluoro-chlorobenzene using catalyst **5g**.

Complex **5g** (4.18 mg,  $10\ \mu\text{mol}$ ), hexamethylbenzene (32.1 mg,  $0.2\ \text{mmol}$ ) and NaOtBu (126.5 mg,  $1.32\ \text{mmol}$ ) were placed in a 10 mL vial and evacuated and backfilled with  $\text{N}_2$ . Dry 1,4-dioxane (2 mL), propiophenone ( $1.2\ \text{mmol}$ ) and the appropriate aryl chloride ( $1\ \text{mmol}$ ) were added. A sample was taken (time = 0) and the reaction mixture was heated to  $125\ ^\circ\text{C}$ . After 30 seconds, the reaction time was set to zero to account for the heating of the sample. Samples were taken after 30 minutes and 60 minutes and analyzed with  $^1\text{H}$ -NMR spectroscopy in  $\text{CDCl}_3$ . No product was detected after 60 minutes at  $125\ ^\circ\text{C}$ .



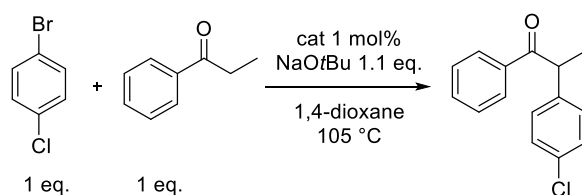

**Scheme S17:** General method for the competitive C-Cl vs C-Br activation using catalyst **5g**.

Complex **5g** (4.32 mg, 10  $\mu$ mol), hexamethylbenzene (30.8 mg, 0.2 mmol), 1-bromo-4-chlorobenzene (190.8 mg, 1 mmol) and NaOtBu (106.4 mg, 1.1 mmol) were placed in a 10 mL vial and evacuated and backfilled with N<sub>2</sub>. Dry 1,4-dioxane (2 mL) and propiophenone (1 mmol) were added. A sample was taken (time = 0) and the reaction mixture was heated to 105 °C. After 30 seconds, the reaction time was set to zero to account for the heating of the sample. Samples were taken after 1, 2 and 20 hours and analyzed by <sup>1</sup>H NMR spectroscopy in CDCl<sub>3</sub>. After 20 hours at 105 °C, the reaction mixture was cooled to room temperature and extracted with EtOAc (3 mL), organic layer was filtered over celite and analyzed by GC-MS. <sup>1</sup>H-NMR spectra in CDCl<sub>3</sub> in agreement with literature.<sup>S14</sup> Due to incomplete conversion of the starting material, only the aliphatic protons of the product were integrated.

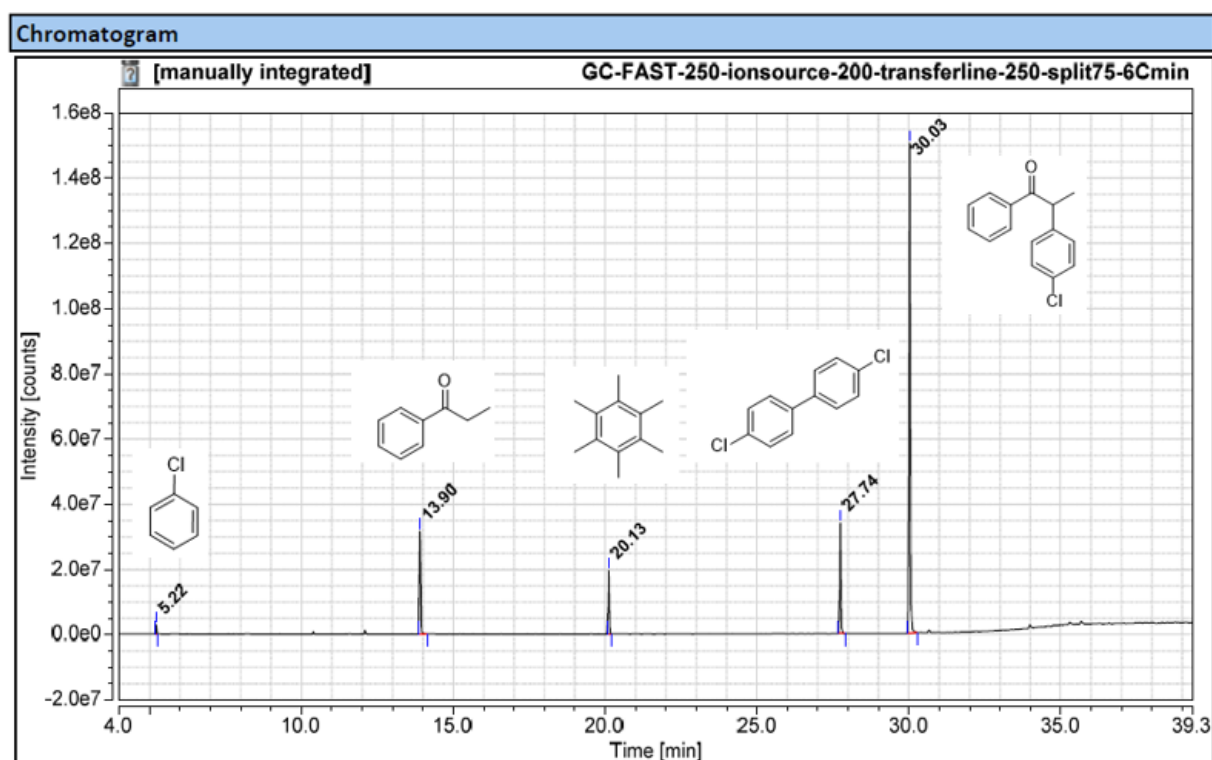

**Figure S85:** GC-MS chromatogram for the reaction of 1-bromo-4-chlorobenzene and propiophenone catalyzed by complex **5g** showing the absence of the brominated product.

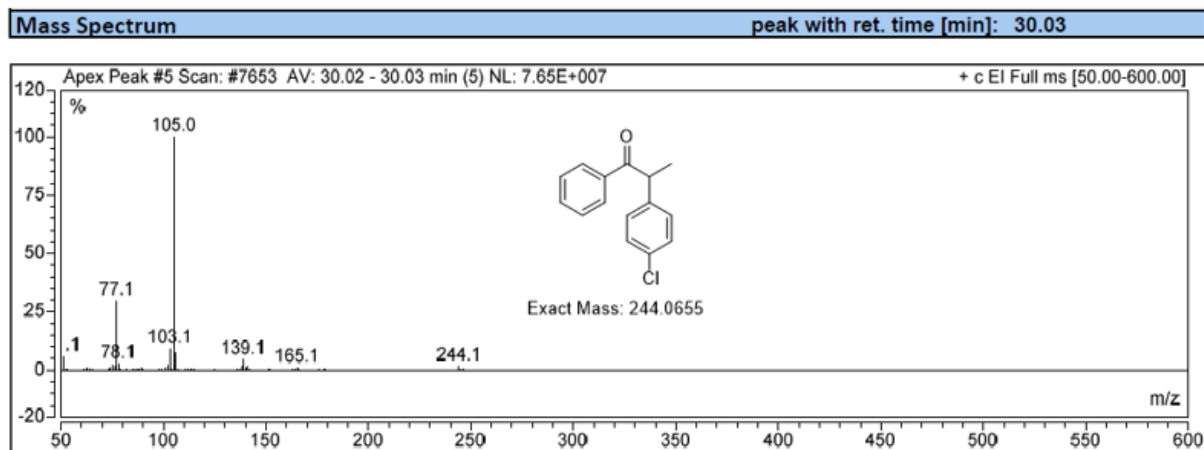

**Figure S86:** MS trace for compound with retention time 30.03 min for the reaction of 1-bromo-4-chlorobenzene and propiophenone catalyzed by complex **5g**.

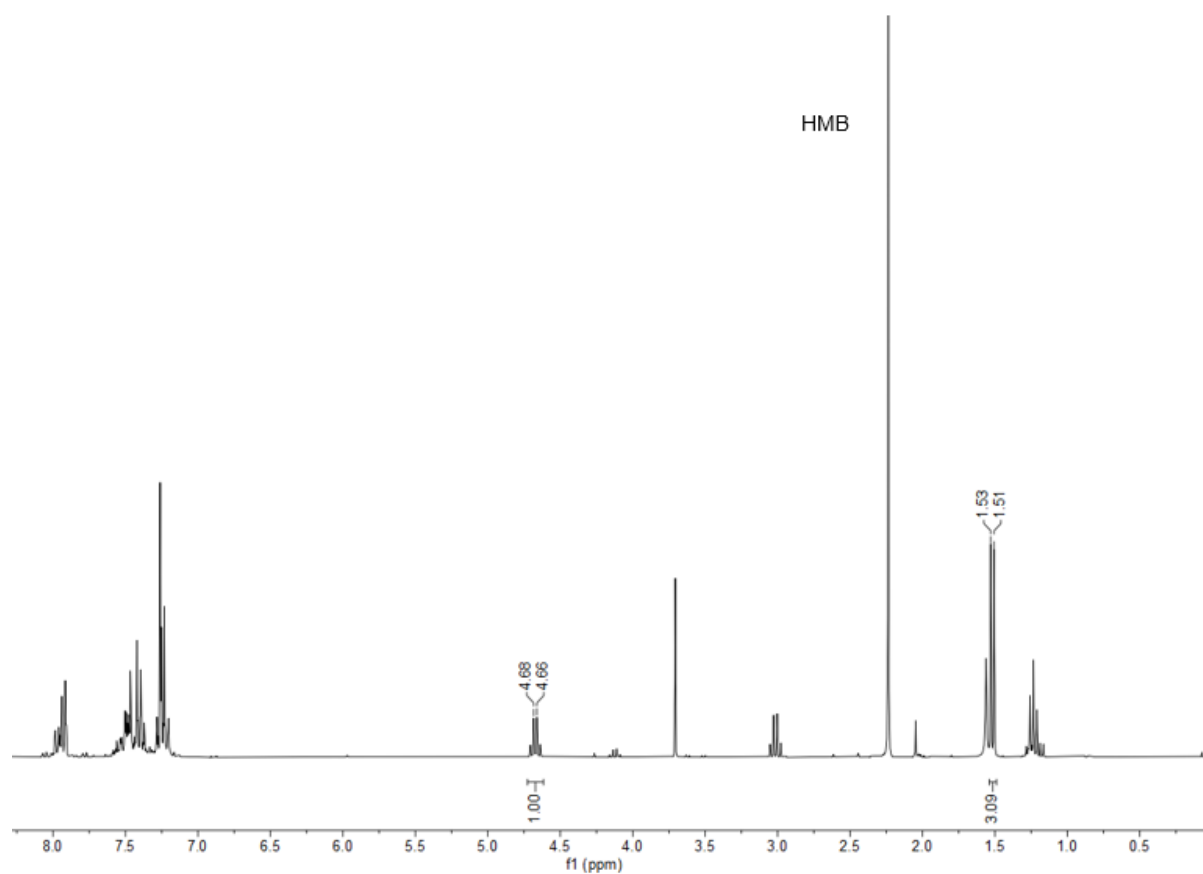

**Figure S87:**  $^1\text{H-NMR}$  spectrum ( $\text{CDCl}_3$ , 298 K, 300 MHz) for the reaction of 1-bromo-4-chlorobenzene and propiophenone catalyzed by complex **5g**.

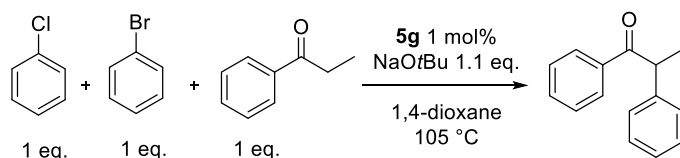

**Scheme S18:** Competitive propiophenone arylation in the presence chlorobenzene and bromobenzene using catalyst **5g**.

Complex **5g** (4.28 mg, 10  $\mu\text{mol}$ ), hexamethylbenzene (33.1 mg, 0.2 mmol) and NaOtBu (105.8 mg, 1.1 mmol) were placed in a 10 mL vial and evacuated and backfilled with  $\text{N}_2$ . Dry 1,4-dioxane (2 mL), bromobenzene (1 mmol), chlorobenzene (1 mmol) and propiophenone (1 mmol) were added. A sample was taken (time = 0) and the reaction mixture was heated to 105  $^\circ\text{C}$ . After 30 seconds, the reaction time was set to zero to account for the heating of the sample. Samples were taken after 1, 2 and 20 h, diluted in 1,4-dioxane, filtered over celite and analyzed by GC-FID.

## S.5 References

- S1 E. Reusser and M. Albrecht, *Dalton Trans.*, 2023, **52**, 16688–16697.
- S2 P. Sambasiva Rao, C. Kurumurthy, B. Veeraswamy, G. Santhosh Kumar, Y. Poornachandra, C. Ganesh Kumar, S. B. Vasamsetti, S. Kotamraju and B. Narsaiah, *Eur. J. Med. Chem.*, 2014, **80**, 184–191.
- S3 W. A. A. Arafa and A. E.-A. A. Nayl, *Appl. Organomet. Chem.*, 2019, **33**, e5156.
- S4 Lifechemicals Shop, <https://shop.lifechemicals.com/compound/1/F2146-0680>, (accessed 19 December 2023).
- S5 A. Kolarovič, M. Schnürch and M. D. Mihovilovic, *J. Org. Chem.*, 2011, **76**, 2613–2618.
- S6 KYN THERAPEUTICS, US Pat., WO2019036657A1, 2019.
- S7 G. M. Ó. Máille, A. Dall’Anese, P. Grossenbacher, T. Montini, B. Milani and M. Albrecht, *Dalton Trans.*, 2021, **50**, 6133–6145.
- S8 Oxford Diffraction (2018). CrysAlisPro (Version 1.171.40.37a). Oxford Diffraction Ltd., Yarnton, Oxfordshire, UK.
- S9 G. M. Sheldrick, *Acta Cryst.*, 2015, **A71**, 3-8.
- S10 G. M. Sheldrick, *Acta Cryst.*, 2015, **C71**, 3-8.
- S11 O. V. Dolomanov, L. J. Bourhis, R. J. Gildea, J. a. K. Howard and H. Puschmann, *J. Appl. Crystallogr.*, 2009, **42**, 339–341.
- S12 L. Falivene, Z. Cao, A. Petta, L. Serra, A. Poater, R. Oliva, V. Scarano and L. Cavallo, *Nat. Chem.*, 2019, **11**, 872–879.
- S13 J. Burés, *Angew. Chem. Int. Ed.*, 2016, **55**, 2028–2031.
- S14 S.-R. Wang and P.-Q. Huang, *Chin. J. Chem.*, 2019, **37**, 887–891.
